# Supplementary material for: A Mathematical Approach to Supply Complexity Management Efficiency Evaluation for Supply Chain
Source: Hindawi journal article supplement (doi:10.1155/2015/865970), 2015-01-01
Supplement: f1 [file 865970.f1.xls]

## Sheet: Tbl_Results_of_Envelopment_Mode
NO	DMU	Score	BootstrapNo	RandomNumber (Bootstrap)	RandomNumber (Smooth)	Benchmark(Lambda)	Proportionate Movement (1)	Slack Movement (1)	Projection (1)	Proportionate Movement (2)	Slack Movement (2)	Projection (2)	Proportionate Movement (3)	Slack Movement (3)	Projection (3)	Proportionate Movement (11)	Slack Movement (11)	Projection (11)
1	GS Caltex	0.483592	0			KOGAS(0.188063); S-Oil(1.164202)	-12.3938	0	11.6062	-7.74613	0	7.25387	-25.8204	-5.54339	18.6362	0	0	38235
2	Hanwha	0.1302	0			Samsung Electronics(0.170261)	-49.5786	-2.48381	4.93757	-194.835	-2.09321	27.0715	-14.7866	0	2.21339	0	0	35574
3	Hyundai Motor	0.649955	0			Samsung Electronics(0.361466); S-Oil(0.340941)	-10.8514	-6.59761	13.551	-31.5041	0	58.4959	-4.55059	0	8.44941	0	0	84771
4	KEPCO	1	0			KEPCO(1.000000)	0	0	7	0	0	76	0	0	241	0	0	54252
5	KIA Motor	0.412991	0			KOGAS(0.031996); Samsung Electronics(0.035783); S-Oil(1.331780)	-18.7843	0	13.2157	-14.6752	0	10.3248	-22.8934	0	16.1066	0	0	44730
6	KOGAS	1	0			KOGAS(1.000000)	0	0	6	0	0	20	0	0	31	0	0	35411
7	LG Electronics	0.379177	0			Samsung Electronics(0.232606); S-Oil(0.311103)	-20.4872	-2.96734	9.5455	-62.0823	0	37.9177	-10.554	0	6.44601	0	0	57038
8	Lotte Shopping	0.17242	0			KOGAS(0.235971); Samsung Electronics(0.027748); S-Oil(0.462116)	-30.6205	0	6.37955	-50.4824	0	10.5176	-61.2409	0	12.7591	0	0	26687
9	POSCO	0.85356	0			KEPCO(0.001856); Samsung Electronics(0.293883)	-1.4644	0	8.5356	-38.6603	-178.471	46.8684	-0.732202	0	4.2678	0	0	61504
10	Samsung Electronics	1	0			Samsung Electronics(1.000000)	0	0	29	0	0	159	0	0	13	0	0	208938
11	SK Holdings	0.701075	0			KEPCO(0.045939); Samsung Electronics(0.496586)	-6.27743	0	14.7226	-63.0732	-65.4782	82.4486	-7.47313	0	17.5269	0	0	106248
12	S-Oil	1	0			S-Oil(1.000000)	0	0	9	0	0	3	0	0	11	0	0	27122
13	GS Caltex	0.637386	1	11	3.830270799950460E-01	GS Caltex(1.000000)	-8.70274	0	15.2973	-5.43921	0	9.56079	-18.1307	0	31.8693	0	0	38235
14	Hanwha	0.152463	1	9	3.793438240938530E-02	Hanwha(1.000000)	-48.3096	0	8.69039	-189.848	0	34.1517	-14.4081	0	2.59187	0	0	35574
15	Hyundai Motor	0.834408	1	3	-2.698463705373220E-01	Hanwha(2.066365); Lotte Shopping(0.422008)	-5.13335	-5.16335	20.7033	-14.9033	0	75.0967	-2.1527	0	10.8473	0	0	84771
16	KEPCO	1.11764	1	12	4.192056917106930E-01	KEPCO(1.000000)	0.82351	0	7.82351	8.94096	0	84.941	28.3523	0	269.352	0	0	54252
17	KIA Motor	0.654157	1	8	2.337230035108960E-01	GS Caltex(0.279855); Lotte Shopping(1.275143)	-11.067	-8.35534	12.5777	-8.64608	0	16.3539	-13.4879	0	25.5121	0	0	44730
18	KOGAS	1.30897	1	1	-4.846697982212510E-01	KEPCO(0.106855); Lotte Shopping(0.856797); Samsung Electronics(0.032299)	1.85381	0	7.85381	6.17935	0	26.1794	9.578	0	40.578	0	0	35411
19	LG Electronics	0.491146	1	8	4.583000206938400E-01	Hanwha(1.319124); Lotte Shopping(0.378892)	-16.7922	-2.27889	13.9289	-50.8854	0	49.1146	-8.65051	0	8.34949	0	0	57038
20	Lotte Shopping	0.17585	1	10	-3.916585611195110E-02	Lotte Shopping(1.000000)	-30.4935	0	6.50646	-50.2731	0	10.7269	-60.9871	0	13.0129	0	0	26687
21	POSCO	0.902217	1	10	-1.917288607827940E-01	POSCO(1.000000)	-0.977829	0	9.02217	-25.8147	0	238.185	-0.488915	0	4.51108	0	0	61504
22	Samsung Electronics	1.54066	1	11	-3.100349546472200E-01	Samsung Electronics(1.000000)	15.6793	0	44.6793	85.9657	0	244.966	7.02864	0	20.0286	0	0	208938
23	SK Holdings	0.976667	1	2	-2.434602221003820E-01	KEPCO(0.056412); POSCO(0.483541); Samsung Electronics(0.351529)	-0.489996	0	20.51	-4.92329	0	206.077	-0.583328	0	24.4167	0	0	106248
24	S-Oil	2.26065	1	8	5.678989907964950E-02	GS Caltex(0.709350)	11.3458	-9.49473	10.8511	3.78195	0	6.78195	13.8671	-2.26065	22.6065	0	0	27122
25	GS Caltex	0.515562	2	6	2.266837146151230E-01	GS Caltex(1.000000)	-11.6265	0	12.3735	-7.26657	0	7.73343	-24.2219	0	25.7781	0	0	38235
26	Hanwha	0.21134	2	7	-2.337392380074940E-01	Hyundai Motor(0.419648)	-44.9536	-3.47898	8.5674	-176.66	-22.4671	24.8731	-13.4072	0	3.59278	0	0	35574
27	Hyundai Motor	0.65857	2	4	-9.849959428512610E-03	Hyundai Motor(1.000000)	-10.5843	0	20.4157	-30.7287	0	59.2713	-4.43859	0	8.56141	0	0	84771
28	KEPCO	1.69112	2	7	-8.776389126863810E-01	LG Electronics(0.611231); POSCO(0.315242)	4.83787	0	11.8379	52.5255	0	128.525	166.561	-401.523	6.03823	0	0	54252
29	KIA Motor	0.554226	2	11	2.986279762821160E-01	KIA Motor(1.000000)	-14.2648	0	17.7352	-11.1444	0	13.8556	-17.3852	0	21.6148	0	0	44730
30	KOGAS	1.33101	2	11	-2.448621077287270E-02	LG Electronics(0.611953); POSCO(0.008234)	1.98606	0	7.98606	6.62021	0	26.6202	10.2613	-37.1489	4.11246	0	0	35411
31	LG Electronics	0.39033	2	10	7.850723311981680E-02	LG Electronics(1.000000)	-20.1191	0	12.8809	-60.967	0	39.033	-10.3644	0	6.63562	0	0	57038
32	Lotte Shopping	0.197095	2	7	4.181911060309330E-02	GS Caltex(0.338543); LG Electronics(0.240941)	-29.7075	0	7.2925	-48.9772	0	12.0228	-59.415	-4.25921	10.3258	0	0	26687
33	POSCO	1.25766	2	3	2.084054664971020E-01	POSCO(1.000000)	2.5766	0	12.5766	68.0223	0	332.022	1.2883	0	6.2883	0	0	61504
34	Samsung Electronics	1.67924	2	5	-6.495919479584330E-02	Hyundai Motor(1.624203); LG Electronics(0.795593); POSCO(0.420682)	19.6979	0	48.6979	107.999	0	266.999	8.8301	0	21.8301	0	0	208938
35	SK Holdings	1.10785	2	8	-1.017444739794770E-01	LG Electronics(1.263806); POSCO(0.555461)	2.26477	0	23.2648	22.7555	0	233.756	2.69615	-15.8171	11.879	0	0	106248
36	S-Oil	1.82857	2	8	8.737967488556380E-02	GS Caltex(0.709350)	7.45712	-7.67999	8.77713	2.48571	0	5.48571	9.11426	-1.82857	18.2857	0	0	27122
37	GS Caltex	0.923217	3	8	-9.415517608997250E-01	Lotte Shopping(0.556324); S-Oil(0.862340)	-1.84279	0	22.1572	-1.15174	0	13.8483	-3.83915	-15.2584	30.9025	0	0	38235
38	Hanwha	0.202725	3	3	-4.714310767583810E-02	Hanwha(1.000000)	-45.4447	0	11.5553	-178.59	0	45.4104	-13.5537	0	3.44632	0	0	35574
39	Hyundai Motor	0.727736	3	4	-4.301379195454190E-01	Hyundai Motor(1.000000)	-8.44019	0	22.5598	-24.5038	0	65.4962	-3.53943	0	9.46057	0	0	84771
40	KEPCO	1.03605	3	6	1.106978779421320E-01	KEPCO(1.000000)	0.25238	0	7.25238	2.74013	0	78.7401	8.68909	0	249.689	0	0	54252
41	KIA Motor	0.765945	3	5	2.460491288525600E-01	Hyundai Motor(0.125526); Lotte Shopping(0.318600); S-Oil(0.943387)	-7.48977	0	24.5102	-5.85138	0	19.1486	-9.12815	0	29.8718	0	0	44730
42	KOGAS	1.49076	3	5	-2.351673334611860E-01	Hyundai Motor(0.375043); KEPCO(0.066692)	2.94459	0	8.94459	9.81529	0	29.8153	15.2137	-26.0132	20.2005	0	0	35411
43	LG Electronics	0.456195	3	1	5.642999936306600E-01	Hyundai Motor(0.655630); KEPCO(0.005140); SK Holdings(0.011114)	-17.9456	0	15.0544	-54.3805	0	45.6195	-9.24469	0	7.75531	0	0	57038
44	Lotte Shopping	0.238694	3	11	1.478112277912840E-01	Lotte Shopping(1.000000)	-28.1683	0	8.83169	-46.4396	0	14.5604	-56.3366	0	17.6634	0	0	26687
45	POSCO	0.864956	3	10	-1.486771782004300E-02	POSCO(1.000000)	-1.35044	0	8.64956	-35.6516	0	228.348	-0.67522	0	4.32478	0	0	61504
46	Samsung Electronics	1.7413	3	1	-1.655734208848000E-01	Hyundai Motor(1.950784); POSCO(0.593216); SK Holdings(0.066664)	21.4977	0	50.4977	117.867	0	276.867	9.63689	0	22.6369	0	0	208938
47	SK Holdings	0.969539	3	11	1.525802208672430E-01	SK Holdings(1.000000)	-0.639689	0	20.3603	-6.42735	0	204.573	-0.761534	0	24.2385	0	0	106248
48	S-Oil	2.22185	3	5	3.408587436375850E-01	S-Oil(1.000000)	10.9967	0	19.9967	3.66556	0	6.66556	13.4404	0	24.4404	0	0	27122
49	GS Caltex	0.520102	4	12	-2.753600268234580E-01	GS Caltex(1.000000)	-11.5176	0	12.4824	-7.19847	0	7.80153	-23.9949	0	26.0051	0	0	38235
50	Hanwha	0.205786	4	7	3.490121622035520E-03	Samsung Electronics(0.170261)	-45.2702	-3.92576	7.80403	-177.904	-3.3084	42.7876	-13.5016	0	3.49836	0	0	35574
51	Hyundai Motor	0.717435	4	10	3.810982865741440E-01	Hyundai Motor(1.000000)	-8.75951	0	22.2405	-25.4308	0	64.5692	-3.67334	0	9.32666	0	0	84771
52	KEPCO	1.09939	4	6	3.649039876006930E-01	KEPCO(1.000000)	0.695723	0	7.69572	7.55356	0	83.5536	23.9527	0	264.953	0	0	54252
53	KIA Motor	0.515449	4	5	-2.546659388475860E-01	Hyundai Motor(0.085687); Lotte Shopping(0.294040); S-Oil(1.092073)	-15.5056	0	16.4944	-12.1138	0	12.8862	-18.8975	0	20.1025	0	0	44730
54	KOGAS	1.01152	4	6	1.471900307024450E-02	KOGAS(1.000000)	0.069096	0	6.0691	0.23032	0	20.2303	0.356996	0	31.357	0	0	35411
55	LG Electronics	0.444379	4	3	1.235586321057260E-01	Hyundai Motor(0.568881); Lotte Shopping(0.134759); Samsung Electronics(0.024970)	-18.3355	0	14.6645	-55.5621	0	44.4379	-9.44556	0	7.55444	0	0	57038
56	Lotte Shopping	0.174048	4	6	5.717232537995730E-03	Lotte Shopping(1.000000)	-30.5602	0	6.43978	-50.3831	0	10.6169	-61.1204	0	12.8796	0	0	26687
57	POSCO	1.34511	4	2	2.912504746820990E-02	KOGAS(0.024296); Samsung Electronics(0.290247)	3.45113	0	13.4511	91.1097	-281.677	73.4323	1.72556	0	6.72556	0	0	61504
58	Samsung Electronics	1.58054	4	3	-1.242609632179510E-01	Samsung Electronics(1.000000)	16.8357	0	45.8357	92.3059	0	251.306	7.54702	0	20.547	0	0	208938
59	SK Holdings	1.06309	4	8	-6.302662412996280E-01	KOGAS(0.578620); Samsung Electronics(0.410449)	1.32493	0	22.3249	13.3124	-109.458	114.854	1.57729	0	26.5773	0	0	106248
60	S-Oil	1.29164	4	9	-3.897306744958790E-01	S-Oil(1.000000)	2.62477	0	11.6248	0.874923	0	3.87492	3.20805	0	14.2081	0	0	27122
61	GS Caltex	0.850643	5	8	-9.851186038623630E-02	KIA Motor(0.670525); S-Oil(0.303902)	-3.58456	0	20.4154	-2.24035	0	12.7597	-7.46783	-17.6261	24.906	0	0	38235
62	Hanwha	0.140571	5	10	2.889541226435710E-01	Hanwha(1.000000)	-48.9874	0	8.01257	-192.512	0	31.488	-14.6103	0	2.38971	0	0	35574
63	Hyundai Motor	0.731415	5	2	-8.156975681520890E-03	Lotte Shopping(0.341686); Samsung Electronics(0.362081)	-8.32614	-9.12059	13.5533	-24.1727	0	65.8273	-3.49161	0	9.50839	0	0	84771
64	KEPCO	1.10458	5	4	-3.815580641214000E-01	KEPCO(1.000000)	0.732063	0	7.73206	7.94811	0	83.9481	25.2039	0	266.204	0	0	54252
65	KIA Motor	0.61956	5	3	1.103533759038250E-01	KIA Motor(1.000000)	-12.1741	0	19.8259	-9.51099	0	15.489	-14.8371	0	24.1629	0	0	44730
66	KOGAS	1.10988	5	12	-4.007005217581630E-01	KOGAS(1.000000)	0.659255	0	6.65925	2.19752	0	22.1975	3.40615	0	34.4062	0	0	35411
67	LG Electronics	0.433166	5	8	-4.096313077184830E-04	Lotte Shopping(0.316506); Samsung Electronics(0.232564)	-18.7055	-4.96094	9.33354	-56.6834	0	43.3166	-9.63618	0	7.36382	0	0	57038
68	Lotte Shopping	0.174986	5	4	2.696310682055910E-02	Lotte Shopping(1.000000)	-30.5255	0	6.4745	-50.3258	0	10.6742	-61.051	0	12.949	0	0	26687
69	POSCO	0.920286	5	3	-5.855340050146850E-02	Samsung Electronics(0.273340); SK Holdings(0.041345)	-0.797141	0	9.20286	-21.0445	-189.571	53.3847	-0.39857	0	4.60143	0	0	61504
70	Samsung Electronics	1.08006	5	10	-2.904824883764260E-01	Samsung Electronics(1.000000)	2.32181	0	31.3218	12.73	0	171.73	1.04081	0	14.0408	0	0	208938
71	SK Holdings	0.738668	5	9	5.210188357352410E-01	SK Holdings(1.000000)	-5.48797	0	15.512	-55.141	0	155.859	-6.5333	0	18.4667	0	0	106248
72	S-Oil	2.60379	5	7	-2.982627512980560E-02	S-Oil(1.000000)	14.4341	0	23.4341	4.81135	0	7.81135	17.6416	0	28.6416	0	0	27122
73	GS Caltex	0.525385	6	11	4.577971753866240E-02	KOGAS(0.190467); S-Oil(1.161064)	-11.3908	0	12.6092	-7.11922	0	7.88078	-23.7307	-6.02247	20.2468	0	0	38235
74	Hanwha	0.157102	6	7	-1.068677988719280E-01	POSCO(0.014218); Samsung Electronics(0.166076)	-48.0452	-3.01139	5.94341	-188.809	0	35.1908	-14.3293	0	2.67073	0	0	35574
75	Hyundai Motor	0.776037	6	11	1.618010275790930E-01	Samsung Electronics(0.357215); S-Oil(0.373687)	-6.94284	-7.87746	16.1797	-20.1566	0	69.8434	-2.91151	0	10.0885	0	0	84771
76	KEPCO	1.01645	6	12	5.204604904104020E-02	KEPCO(1.000000)	0.115143	0	7.11514	1.25013	0	77.2501	3.96422	0	244.964	0	0	54252
77	KIA Motor	0.457233	6	9	-5.245400773321000E-01	KOGAS(0.033023); Samsung Electronics(0.032790); S-Oil(1.353500)	-17.3686	0	14.6314	-13.5692	0	11.4308	-21.1679	0	17.8321	0	0	44730
78	KOGAS	1.07271	6	6	2.807245961264860E-01	KOGAS(1.000000)	0.436276	0	6.43628	1.45426	0	21.4543	2.25409	0	33.2541	0	0	35411
79	LG Electronics	0.450844	6	3	-5.489519191517590E-01	Samsung Electronics(0.228912); S-Oil(0.339560)	-18.1221	-3.52819	11.3497	-54.9156	0	45.0844	-9.33565	0	7.66435	0	0	57038
80	Lotte Shopping	0.19098	6	3	7.234149216521080E-02	KOGAS(0.243655); Samsung Electronics(0.025438); S-Oil(0.469873)	-29.9337	0	7.06627	-49.3502	0	11.6498	-59.8675	0	14.1325	0	0	26687
81	POSCO	0.875737	6	12	9.255734936994490E-02	POSCO(1.000000)	-1.24263	0	8.75737	-32.8054	0	231.195	-0.621315	0	4.37868	0	0	61504
82	Samsung Electronics	1.20819	6	12	7.439870012450940E-01	Samsung Electronics(1.000000)	6.03764	0	35.0376	33.1029	0	192.103	2.70653	0	15.7065	0	0	208938
83	SK Holdings	0.741195	6	10	-2.202082168871860E-01	SK Holdings(1.000000)	-5.43491	0	15.5651	-54.6079	0	156.392	-6.47013	0	18.5299	0	0	106248
84	S-Oil	1.08936	6	12	3.438555135906870E-01	S-Oil(1.000000)	0.804236	0	9.80424	0.268079	0	3.26808	0.982955	0	11.983	0	0	27122
85	GS Caltex	0.678746	7	3	-2.840796912407600E-01	KIA Motor(0.665529); S-Oil(0.312141)	-7.7101	0	16.2899	-4.81881	0	10.1812	-16.0627	-14.0642	19.873	0	0	38235
86	Hanwha	0.147889	7	11	-2.648593370761120E-01	Samsung Electronics(0.170261)	-48.5703	-2.82127	5.60841	-190.873	-2.3776	30.7496	-14.4859	0	2.51411	0	0	35574
87	Hyundai Motor	0.747442	7	4	-7.071517477205630E-01	KIA Motor(0.229085); Samsung Electronics(0.356680)	-7.82929	-7.77042	15.4003	-22.7302	0	67.2698	-3.28325	0	9.71675	0	0	84771
88	KEPCO	1.11022	7	7	2.471121697358430E-01	SK Holdings(0.510617)	0.771569	0	7.77157	8.37703	-6.29127	78.0858	26.564	-258.312	9.25187	0	0	54252
89	KIA Motor	0.498071	7	9	-9.878418742474960E-02	KIA Motor(1.000000)	-16.0617	0	15.9383	-12.5482	0	12.4518	-19.5752	0	19.4248	0	0	44730
90	KOGAS	1.24876	7	8	-4.632283900885240E-01	KIA Motor(0.214919); Samsung Electronics(0.123471)	1.49256	0	7.49256	4.9752	0	24.9752	7.71156	-32.7136	5.99794	0	0	35411
91	LG Electronics	0.43799	7	3	-6.768289297789910E-01	KIA Motor(0.209966); Samsung Electronics(0.228040)	-18.5463	-3.59553	10.8582	-56.201	0	43.799	-9.55416	0	7.44583	0	0	57038
92	Lotte Shopping	0.208525	7	7	-1.340115534745220E-01	KIA Motor(0.394771); Samsung Electronics(0.043213)	-29.2846	0	7.71542	-48.28	0	12.72	-58.5692	-7.1244	8.30644	0	0	26687
93	POSCO	0.962892	7	1	-6.201674051477900E-01	Samsung Electronics(0.271945); SK Holdings(0.044090)	-0.371081	0	9.62892	-9.79654	-198.347	55.8563	-0.18554	0	4.81446	0	0	61504
94	Samsung Electronics	1.13586	7	6	-4.896289422160130E-01	Samsung Electronics(1.000000)	3.94008	0	32.9401	21.6025	0	180.602	1.76624	0	14.7662	0	0	208938
95	SK Holdings	0.72476	7	10	-1.043716103369290E-01	SK Holdings(1.000000)	-5.78003	0	15.22	-58.0756	0	152.924	-6.88099	0	18.119	0	0	106248
96	S-Oil	2.02278	7	1	6.037450993792160E-02	S-Oil(1.000000)	9.205	0	18.205	3.06833	0	6.06833	11.2506	0	22.2506	0	0	27122
97	GS Caltex	0.501404	8	6	1.280823899363560E-01	GS Caltex(1.000000)	-11.9663	0	12.0337	-7.47894	0	7.52106	-24.9298	0	25.0702	0	0	38235
98	Hanwha	0.230493	8	2	5.298365762701140E-01	LG Electronics(0.471487); POSCO(0.141151)	-43.8619	-5.496	7.64211	-172.37	0	51.6305	-13.0816	0	3.91838	0	0	35574
99	Hyundai Motor	0.789213	8	1	-3.315118617613040E-01	LG Electronics(1.429359); POSCO(0.052732)	-6.53441	-4.53619	19.9294	-18.9709	0	71.0291	-2.74024	0	10.2598	0	0	84771
100	KEPCO	1.27673	8	5	-3.352169275588320E-01	POSCO(0.051257); SK Holdings(0.480945)	1.93712	0	8.93712	21.0315	0	97.0315	66.6921	-297.358	10.3339	0	0	54252
101	KIA Motor	0.444699	8	9	-7.086055778103090E-01	LG Electronics(0.121758); Lotte Shopping(0.213937); S-Oil(1.182649)	-17.7696	0	14.2304	-13.8825	0	11.1175	-21.6567	0	17.3433	0	0	44730
102	KOGAS	1.35173	8	11	-1.078988382664320E-01	Lotte Shopping(0.960209); SK Holdings(0.092104)	2.11035	0	8.11035	7.0345	0	27.0345	10.9035	-26.9997	14.9038	0	0	35411
103	LG Electronics	0.412862	8	9	3.514783221780720E-01	LG Electronics(1.000000)	-19.3755	0	13.6245	-58.7138	0	41.2862	-9.98134	0	7.01866	0	0	57038
104	Lotte Shopping	0.182493	8	6	2.152560167626120E-01	Lotte Shopping(1.000000)	-30.2478	0	6.75224	-49.8679	0	11.1321	-60.4955	0	13.5045	0	0	26687
105	POSCO	0.863159	8	12	1.993733763735630E-02	POSCO(1.000000)	-1.36841	0	8.6316	-36.1259	0	227.874	-0.684203	0	4.3158	0	0	61504
106	Samsung Electronics	1.79471	8	1	-2.242224464500460E-01	LG Electronics(2.874377); POSCO(0.731485)	23.0466	-6.57085	45.4757	126.359	0	285.359	10.3312	0	23.3312	0	0	208938
107	SK Holdings	0.84107	8	6	-7.082956390961440E-01	SK Holdings(1.000000)	-3.33752	0	17.6625	-33.5342	0	177.466	-3.97324	0	21.0268	0	0	106248
108	S-Oil	1.04539	8	4	1.630542365096860E-01	S-Oil(1.000000)	0.408478	0	9.40848	0.136159	0	3.13616	0.49925	0	11.4992	0	0	27122
109	GS Caltex	0.646006	9	11	3.107380470521920E-01	GS Caltex(1.000000)	-8.49586	0	15.5041	-5.30991	0	9.69009	-17.6997	0	32.3003	0	0	38235
110	Hanwha	0.206449	9	3	-1.293227063068260E-01	Hanwha(1.000000)	-45.2324	0	11.7676	-177.755	0	46.2447	-13.4904	0	3.50964	0	0	35574
111	Hyundai Motor	0.657211	9	6	7.467807475260940E-03	Hyundai Motor(1.000000)	-10.6265	0	20.3735	-30.851	0	59.149	-4.45626	0	8.54374	0	0	84771
112	KEPCO	1.2128	9	9	-1.217097250536500E-01	KEPCO(1.000000)	1.48959	0	8.48959	16.1727	0	92.1727	51.2844	0	292.284	0	0	54252
113	KIA Motor	0.614001	9	11	-1.694536790683800E-01	KIA Motor(1.000000)	-12.352	0	19.648	-9.64997	0	15.35	-15.054	0	23.946	0	0	44730
114	KOGAS	1.11974	9	9	2.340717481857670E-01	KOGAS(1.000000)	0.718438	0	6.71844	2.39479	0	22.3948	3.71193	0	34.7119	0	0	35411
115	LG Electronics	0.402902	9	12	-2.194974955791240E-01	LG Electronics(1.000000)	-19.7042	0	13.2958	-59.7098	0	40.2902	-10.1507	0	6.84933	0	0	57038
116	Lotte Shopping	0.179283	9	6	1.281705893217870E-01	Lotte Shopping(1.000000)	-30.3665	0	6.63346	-50.0638	0	10.9362	-60.7331	0	13.2669	0	0	26687
117	POSCO	1.44054	9	8	-4.454898198081350E-02	Hyundai Motor(0.111831); LG Electronics(0.912093)	4.40536	0	14.4054	116.302	-336.938	43.3631	2.20268	0	7.20268	0	0	61504
118	Samsung Electronics	1.71549	9	5	-3.419017890525240E-02	Hyundai Motor(1.704663); LG Electronics(1.129633)	20.7493	0	49.7493	113.764	-126.421	146.342	9.30142	0	22.3014	0	0	208938
119	SK Holdings	1.14148	9	8	3.862710853721800E-02	KOGAS(0.518010); LG Electronics(1.541161)	2.97112	0	23.9711	29.8527	-167.158	73.6944	3.53705	0	28.537	0	0	106248
120	S-Oil	2.29122	9	2	1.222084539491240E-01	GS Caltex(0.709350)	11.621	-9.62313	10.9979	3.87366	0	6.87366	14.2034	-2.29122	22.9122	0	0	27122
121	GS Caltex	0.700439	10	7	2.705158387187100E-02	KIA Motor(0.854795)	-7.18947	-3.36211	13.4484	-4.49342	0	10.5066	-14.9781	-18.6317	16.3903	0	0	38235
122	Hanwha	0.310877	10	2	1.222622189446750E-01	Hyundai Motor(0.419648)	-39.28	-5.11751	12.6025	-154.364	-33.0486	36.5878	-11.7151	0	5.28491	0	0	35574
123	Hyundai Motor	0.968743	10	3	1.806419970454790E-01	Hyundai Motor(1.000000)	-0.968953	0	30.031	-2.81309	0	87.1869	-0.406335	0	12.5937	0	0	84771
124	KEPCO	1.4002	10	3	4.755924608539510E-01	KEPCO(1.000000)	2.8014	0	9.8014	30.4152	0	106.415	96.4483	0	337.448	0	0	54252
125	KIA Motor	0.491653	10	4	-6.445645041387320E-01	KIA Motor(1.000000)	-16.2671	0	15.7329	-12.7087	0	12.2913	-19.8255	0	19.1745	0	0	44730
126	KOGAS	1.71808	10	1	-4.994973615128610E-02	KEPCO(0.125159); KIA Motor(0.481572); SK Holdings(0.066638)	4.30846	0	10.3085	14.3615	0	34.3615	22.2604	0	53.2604	0	0	35411
127	LG Electronics	0.595506	10	1	-8.006400035447040E-03	Hyundai Motor(0.575000); KIA Motor(0.099692); SK Holdings(0.036099)	-13.3483	0	19.6517	-40.4494	0	59.5506	-6.87641	0	10.1236	0	0	57038
128	Lotte Shopping	0.237805	10	2	-2.733758749741890E-01	KEPCO(0.021170); KIA Motor(0.508061); SK Holdings(0.026475)	-28.2012	0	8.79878	-46.4939	0	14.5061	-56.4024	0	17.5976	0	0	26687
129	POSCO	2.03689	10	5	-4.929220308655980E-01	Hyundai Motor(0.607328); SK Holdings(0.094309)	10.3689	0	20.3689	273.739	-463.385	74.3547	5.18446	0	10.1845	0	0	61504
130	Samsung Electronics	2.49013	10	2	-2.378548936206600E-01	Hyundai Motor(2.314450); SK Holdings(0.119906)	43.2137	0	72.2137	236.93	-166.928	229.003	19.3717	0	32.3717	0	0	208938
131	SK Holdings	1.0756	10	3	5.024119030451540E-02	SK Holdings(1.000000)	1.58753	0	22.5875	15.9509	0	226.951	1.88992	0	26.8899	0	0	106248
132	S-Oil	2.48428	10	2	1.538444066753720E-01	KIA Motor(0.606349)	13.3585	-12.8189	9.53964	4.45284	0	7.45284	16.3271	-15.7007	11.6264	0	0	27122
133	GS Caltex	0.759119	11	5	-7.408667558290120E-01	KIA Motor(0.854795)	-5.78114	-3.64377	14.5751	-3.61321	0	11.3868	-12.044	-20.1926	17.7634	0	0	38235
134	Hanwha	0.137953	11	10	-2.084962446362240E-01	Hanwha(1.000000)	-49.1367	0	7.86331	-193.099	0	30.9014	-14.6548	0	2.3452	0	0	35574
135	Hyundai Motor	0.730934	11	9	-4.290763100322330E-01	KIA Motor(0.209406); Samsung Electronics(0.360893)	-8.34104	-7.5988	15.0602	-24.2159	0	65.7841	-3.49786	0	9.50214	0	0	84771
136	KEPCO	1.06292	11	6	2.217561176972310E-01	KEPCO(1.000000)	0.440424	0	7.44042	4.78175	0	80.7817	15.1632	0	256.163	0	0	54252
137	KIA Motor	0.532843	11	11	4.768780901874060E-01	KIA Motor(1.000000)	-14.949	0	17.051	-11.6789	0	13.3211	-18.2191	0	20.7809	0	0	44730
138	KOGAS	1.11622	11	4	-4.208495051213670E-01	KOGAS(1.000000)	0.697316	0	6.69732	2.32438	0	22.3244	3.6028	0	34.6028	0	0	35411
139	LG Electronics	0.430157	11	3	-3.116337994570510E-01	KIA Motor(0.192754); Samsung Electronics(0.231725)	-18.8048	-3.53123	10.664	-56.9843	0	43.0157	-9.68733	0	7.31267	0	0	57038
140	Lotte Shopping	0.208382	11	2	-1.412142353247330E-01	KIA Motor(0.325037); KOGAS(0.243474); Samsung Electronics(0.016878)	-29.2899	0	7.71015	-48.2887	0	12.7113	-58.5797	0	15.4203	0	0	26687
141	POSCO	0.936997	11	7	-3.997114011280800E-01	KEPCO(0.001917); Samsung Electronics(0.293867)	-0.630033	0	9.36997	-16.6329	-195.917	51.4499	-0.315017	0	4.68498	0	0	61504
142	Samsung Electronics	1.09781	11	6	-3.542753671102880E-01	Samsung Electronics(1.000000)	2.83651	0	31.8365	15.5519	0	174.552	1.27154	0	14.2715	0	0	208938
143	SK Holdings	0.769055	11	1	-1.276600305977420E-01	KEPCO(0.047410); Samsung Electronics(0.496204)	-4.84984	0	16.1502	-48.7293	-71.8274	90.4433	-5.77362	0	19.2264	0	0	106248
144	S-Oil	2.69241	11	2	-9.079500629289980E-02	KIA Motor(0.606349)	15.2317	-13.8928	10.3388	5.07722	0	8.07722	18.6165	-17.016	12.6005	0	0	27122
145	GS Caltex	0.489389	12	12	-1.603080506253670E-02	GS Caltex(1.000000)	-12.2547	0	11.7453	-7.65916	0	7.34084	-25.5305	0	24.4695	0	0	38235
146	Hanwha	0.13533	12	11	-4.111335315976940E-01	Samsung Electronics(0.170261)	-49.2862	-2.58167	5.13211	-193.686	-2.17568	28.1381	-14.6994	0	2.3006	0	0	35574
147	Hyundai Motor	0.702753	12	7	-3.414589776122380E-01	GS Caltex(0.166096); Samsung Electronics(0.375328)	-9.21465	-8.52112	13.2642	-26.7522	0	63.2478	-3.86421	0	9.13579	0	0	84771
148	KEPCO	1.01066	12	4	1.027324810545400E-02	KEPCO(1.000000)	0.074619	0	7.07462	0.810149	0	76.8101	2.56902	0	243.569	0	0	54252
149	KIA Motor	0.5852	12	11	-2.222117214034850E-01	GS Caltex(0.906045); Samsung Electronics(0.048279)	-13.2736	-6.62932	12.0971	-10.37	0	14.63	-16.1772	0	22.8228	0	0	44730
150	KOGAS	1.11251	12	5	3.052150684782520E-02	GS Caltex(0.251464); Samsung Electronics(0.123464)	0.675051	0	6.67505	2.25017	0	22.2502	3.48776	-26.6663	7.82145	0	0	35411
151	LG Electronics	0.415941	12	7	9.513374413653610E-03	GS Caltex(0.153764); Samsung Electronics(0.244852)	-19.2739	-4.53958	9.18648	-58.4059	0	41.5941	-9.929	0	7.071	0	0	57038
152	Lotte Shopping	0.178974	12	5	-1.135447545196270E-01	GS Caltex(0.444995); Samsung Electronics(0.046294)	-30.378	0	6.62205	-50.0826	0	10.9174	-60.7559	-1.72977	11.5143	0	0	26687
153	POSCO	0.886725	12	11	-2.035225432262060E-01	Samsung Electronics(0.273675); SK Holdings(0.040687)	-1.13275	0	8.86725	-29.9047	-182.657	51.4379	-0.566377	0	4.43362	0	0	61504
154	Samsung Electronics	1.0394	12	12	-1.315225190287300E-01	Samsung Electronics(1.000000)	1.14262	0	30.1426	6.26473	0	165.265	0.51221	0	13.5122	0	0	208938
155	SK Holdings	0.723252	12	12	-9.941983919800800E-02	SK Holdings(1.000000)	-5.81171	0	15.1883	-58.3938	0	152.606	-6.9187	0	18.0813	0	0	106248
156	S-Oil	1.73574	12	1	-3.183280524627710E-01	GS Caltex(0.709350)	6.62167	-7.29011	8.33156	2.20722	0	5.20722	8.09315	-1.73574	17.3574	0	0	27122
157	GS Caltex	0.534974	13	9	9.191430823118440E-02	KIA Motor(0.568198); S-Oil(0.472661)	-11.1606	0	12.8394	-6.9754	0	8.0246	-23.2513	-11.0852	15.6635	0	0	38235
158	Hanwha	0.197018	13	11	-2.630869739656750E-01	Hanwha(1.000000)	-45.77	0	11.23	-179.868	0	44.1321	-13.6507	0	3.34931	0	0	35574
159	Hyundai Motor	0.880613	13	2	-4.055796744436830E-01	Hanwha(0.487681); LG Electronics(1.182058)	-3.701	-2.7705	24.5285	-10.7448	0	79.2552	-1.55203	0	11.448	0	0	84771
160	KEPCO	1.16721	13	9	-2.511545703730360E-01	POSCO(0.045630); SK Holdings(0.484203)	1.17047	0	8.17047	12.7079	0	88.7079	40.2975	-271.85	9.44746	0	0	54252
161	KIA Motor	0.459815	13	12	-4.233055914486250E-01	KIA Motor(1.000000)	-17.2859	0	14.7141	-13.5046	0	11.4954	-21.0672	0	17.9328	0	0	44730
162	KOGAS	1.4655	13	3	-3.065516499106610E-01	KIA Motor(0.433007); SK Holdings(0.150992)	2.79302	0	8.79302	9.31007	0	29.3101	14.4306	-34.7826	10.648	0	0	35411
163	LG Electronics	0.488409	13	6	-9.631482868477070E-01	LG Electronics(1.000000)	-16.8825	0	16.1175	-51.1591	0	48.8409	-8.69705	0	8.30295	0	0	57038
164	Lotte Shopping	0.213679	13	11	-6.681300449147500E-02	KIA Motor(0.487020); SK Holdings(0.046143)	-29.0939	0	7.90613	-47.9656	0	13.0344	-58.1877	-6.19759	9.61468	0	0	26687
165	POSCO	0.886435	13	6	1.363722716693430E-01	POSCO(1.000000)	-1.13565	0	8.86435	-29.9811	0	234.019	-0.567825	0	4.43217	0	0	61504
166	Samsung Electronics	1.88443	13	8	-4.180643310633560E-01	Hanwha(3.954378); POSCO(0.153260); SK Holdings(0.553788)	25.6484	0	54.6484	140.624	0	299.624	11.4976	0	24.4976	0	0	208938
167	SK Holdings	0.763748	13	10	3.356757952122920E-01	SK Holdings(1.000000)	-4.96129	0	16.0387	-49.8492	0	161.151	-5.9063	0	19.0937	0	0	106248
168	S-Oil	1.05287	13	10	1.945449242698450E-01	S-Oil(1.000000)	0.475817	0	9.47582	0.158606	0	3.15861	0.581554	0	11.5816	0	0	27122
169	GS Caltex	0.541003	14	11	-5.614231287072640E-01	Lotte Shopping(0.429635); S-Oil(0.986997)	-11.0159	0	12.9841	-6.88495	0	8.11505	-22.9498	-8.94138	18.1088	0	0	38235
170	Hanwha	0.140411	14	6	-2.947523788095690E-01	Hanwha(1.000000)	-48.9966	0	8.0034	-192.548	0	31.452	-14.613	0	2.38698	0	0	35574
171	Hyundai Motor	0.706417	14	3	-8.544921318870900E-02	Hanwha(0.548932); LG Electronics(1.143857)	-9.10108	-2.22247	19.6765	-26.4225	0	63.5775	-3.81658	0	9.18342	0	0	84771
172	KEPCO	1.1319	14	9	1.679279540324310E-01	KEPCO(1.000000)	0.92331	0	7.92331	10.0245	0	86.0245	31.7883	0	272.788	0	0	54252
173	KIA Motor	0.459693	14	12	-4.227014936127580E-01	KIA Motor(1.000000)	-17.2898	0	14.7102	-13.5077	0	11.4923	-21.072	0	17.928	0	0	44730
174	KOGAS	1.23602	14	8	-5.348482794477510E-02	Lotte Shopping(0.620393); Samsung Electronics(0.090240)	1.41613	0	7.41613	4.72043	0	24.7204	7.31667	-28.5409	9.77581	0	0	35411
175	LG Electronics	0.40488	14	12	2.538142712816150E-01	LG Electronics(1.000000)	-19.6389	0	13.3611	-59.512	0	40.488	-10.117	0	6.88297	0	0	57038
176	Lotte Shopping	0.18112	14	9	5.235652894780690E-01	Lotte Shopping(1.000000)	-30.2986	0	6.70144	-49.9517	0	11.0483	-60.5971	0	13.4029	0	0	26687
177	POSCO	0.871624	14	6	-6.432091570537390E-02	POSCO(1.000000)	-1.28376	0	8.71624	-33.8912	0	230.109	-0.641879	0	4.35812	0	0	61504
178	Samsung Electronics	1.24519	14	9	-2.493829422273540E-01	Samsung Electronics(1.000000)	7.11039	0	36.1104	38.9846	0	197.985	3.18742	0	16.1874	0	0	208938
179	SK Holdings	0.832267	14	8	-2.872560396038660E-01	KEPCO(0.047466); POSCO(0.426512); Samsung Electronics(0.370639)	-3.52239	0	17.4776	-35.3917	0	175.608	-4.19332	0	20.8067	0	0	106248
180	S-Oil	1.13756	14	9	1.451149988657880E-01	S-Oil(1.000000)	1.23803	0	10.238	0.412677	0	3.41268	1.51315	0	12.5131	0	0	27122
181	GS Caltex	0.611365	15	3	2.914672312027830E-01	KIA Motor(0.672515); S-Oil(0.300619)	-9.32725	0	14.6728	-5.82953	0	9.17047	-19.4318	-12.668	17.9002	0	0	38235
182	Hanwha	0.136486	15	12	1.611871284375590E-01	Hanwha(1.000000)	-49.2203	0	7.77968	-193.427	0	30.5728	-14.6797	0	2.32025	0	0	35574
183	Hyundai Motor	0.726781	15	3	-3.235695922581750E-01	Hanwha(2.040673); KIA Motor(0.272213)	-8.46978	-2.78715	19.7431	-24.5897	0	65.4103	-3.55184	0	9.44816	0	0	84771
184	KEPCO	1.09489	15	8	-3.155156288948410E-01	SK Holdings(0.510617)	0.664253	0	7.66425	7.21189	-6.20439	77.0075	22.8693	-254.745	9.12411	0	0	54252
185	KIA Motor	0.443965	15	12	2.662730956769540E-01	KIA Motor(1.000000)	-17.7931	0	14.2069	-13.9009	0	11.0991	-21.6853	0	17.3147	0	0	44730
186	KOGAS	1.03211	15	4	-9.496513152753070E-02	KOGAS(1.000000)	0.19267	0	6.19267	0.642232	0	20.6422	0.99546	0	31.9955	0	0	35411
187	LG Electronics	0.423965	15	7	-2.190974869426600E-01	Hanwha(1.298808); KIA Motor(0.242213)	-19.0092	-0.445441	13.5454	-57.6035	0	42.3965	-9.7926	0	7.2074	0	0	57038
188	Lotte Shopping	0.187204	15	3	-2.128527280594350E-01	Hanwha(0.086182); KIA Motor(0.332872); KOGAS(0.246585)	-30.0734	0	6.92656	-49.5805	0	11.4195	-60.1469	0	13.8531	0	0	26687
189	POSCO	1.19673	15	7	-4.949122145721520E-01	Hanwha(1.190440); SK Holdings(0.180289)	1.96733	0	11.9673	51.9375	-252.353	63.5848	0.983664	0	5.98366	0	0	61504
190	Samsung Electronics	1.44267	15	2	8.310534240872220E-02	Hanwha(4.473492); SK Holdings(0.468696)	12.8373	0	41.8373	70.3841	-21.9318	207.452	5.75467	0	18.7547	0	0	208938
191	SK Holdings	0.714752	15	4	-4.188887247332640E-02	SK Holdings(1.000000)	-5.9902	0	15.0098	-60.1873	0	150.813	-7.13119	0	17.8688	0	0	106248
192	S-Oil	1.8918	15	1	3.791252146206390E-01	S-Oil(1.000000)	8.02618	0	17.0262	2.67539	0	5.67539	9.80978	0	20.8098	0	0	27122
212	Lotte Shopping	0.177298	17	12	-7.838408288260410E-02	Lotte Shopping(1.000000)	-30.44	0	6.56003	-50.1848	0	10.8152	-60.8799	0	13.1201	0	0	26687
213	POSCO	0.923298	17	11	-4.641379723576420E-02	Samsung Electronics(0.294365)	-0.767021	0	9.23298	-20.2494	-193.128	50.6222	-0.383511	-0.477568	4.13892	0	0	61504
214	Samsung Electronics	1.08158	17	6	-2.907198698486340E-01	Samsung Electronics(1.000000)	2.36577	0	31.3658	12.9709	0	171.971	1.06052	0	14.0605	0	0	208938
215	SK Holdings	0.759521	17	11	1.823691721531320E-01	Samsung Electronics(0.508514)	-5.05005	0	15.9499	-50.741	-72.8093	87.4497	-6.01197	-11.8381	7.14998	0	0	106248
216	S-Oil	1.96256	17	1	-1.669965859978800E-01	GS Caltex(0.709350)	8.66308	-8.24277	9.42031	2.88769	0	5.88769	10.5882	-1.96256	19.6256	0	0	27122
217	GS Caltex	0.495774	18	12	-7.108912000170830E-02	GS Caltex(1.000000)	-12.1014	0	11.8986	-7.56339	0	7.43661	-25.2113	0	24.7887	0	0	38235
218	Hanwha	0.151537	18	6	-5.861844213546130E-01	Hanwha(1.000000)	-48.3624	0	8.63758	-190.056	0	33.9442	-14.4239	0	2.57612	0	0	35574
219	Hyundai Motor	0.719178	18	5	5.426030245882190E-02	Hanwha(0.517817); LG Electronics(1.163263)	-8.70548	-2.26261	20.0319	-25.274	0	64.726	-3.65068	0	9.34932	0	0	84771
220	KEPCO	1.21741	18	1	-2.759335201538830E-02	SK Holdings(0.510617)	1.5219	0	8.5219	16.5235	-6.89868	85.6248	52.397	-283.252	10.1451	0	0	54252
221	KIA Motor	0.424227	18	12	7.957270947876390E-02	KIA Motor(1.000000)	-18.4247	0	13.5753	-14.3943	0	10.6057	-22.4551	0	16.5449	0	0	44730
222	KOGAS	1.29142	18	2	3.932903950327110E-01	Lotte Shopping(0.956144); SK Holdings(0.093125)	1.74849	0	7.74849	5.82831	0	25.8283	9.03388	-25.7951	14.2388	0	0	35411
223	LG Electronics	0.405318	18	10	2.480137723100470E-01	LG Electronics(1.000000)	-19.6245	0	13.3755	-59.4682	0	40.5318	-10.1096	0	6.89041	0	0	57038
224	Lotte Shopping	0.175092	18	6	-2.981191082134070E-02	Lotte Shopping(1.000000)	-30.5216	0	6.4784	-50.3194	0	10.6806	-61.0432	0	12.9568	0	0	26687
225	POSCO	1.32931	18	8	-5.497719528620970E-01	Hanwha(1.190982); SK Holdings(0.180107)	3.29309	0	13.2931	86.9375	-280.309	70.6289	1.64654	0	6.64654	0	0	61504
226	Samsung Electronics	1.60232	18	11	-5.112580516721620E-01	Hanwha(4.475053); SK Holdings(0.468173)	17.4672	0	46.4672	95.7683	-24.3588	230.41	7.83012	0	20.8301	0	0	208938
227	SK Holdings	0.794735	18	10	4.844653013845970E-01	SK Holdings(1.000000)	-4.31057	0	16.6894	-43.3109	0	167.689	-5.13162	0	19.8684	0	0	106248
228	S-Oil	1.75839	18	2	-5.816032305196740E-02	GS Caltex(0.709350)	6.82548	-7.38523	8.44026	2.27516	0	5.27516	8.34226	-1.75839	17.5839	0	0	27122
229	GS Caltex	0.526113	19	2	5.806129581061000E-01	Hanwha(0.133423); S-Oil(1.234740)	-11.3733	0	12.6267	-7.10831	0	7.89169	-23.6944	-11.8191	14.4865	0	0	38235
230	Hanwha	0.134646	19	6	9.543291022974610E-02	Hanwha(1.000000)	-49.3252	0	7.67482	-193.839	0	30.1607	-14.711	0	2.28898	0	0	35574
231	Hyundai Motor	0.712335	19	6	-5.094517033306180E-01	Hanwha(2.085040); S-Oil(0.390745)	-8.91761	-2.4083	19.6741	-25.8898	0	64.1102	-3.73964	0	9.26036	0	0	84771
232	KEPCO	1.09182	19	7	5.852420608290470E-02	SK Holdings(0.510617)	0.642738	0	7.64274	6.9783	-6.18698	76.7913	22.1286	-254.03	9.0985	0	0	54252
233	KIA Motor	0.450314	19	3	-1.482728265578550E-01	Hanwha(0.233838); S-Oil(1.342506)	-17.59	0	14.41	-13.7422	0	11.2578	-21.4378	-1.60819	15.954	0	0	44730
234	KOGAS	1.35827	19	8	-5.633689177922050E-01	Hanwha(0.885753); S-Oil(0.143840)	2.14964	0	8.14964	7.16546	0	27.1655	11.1065	-38.427	3.67948	0	0	35411
235	LG Electronics	0.414671	19	2	-3.931600798992420E-01	Hanwha(1.338839); S-Oil(0.346957)	-19.3159	-0.148477	13.5357	-58.5329	0	41.4671	-9.9506	0	7.0494	0	0	57038
236	Lotte Shopping	0.204565	19	3	1.621873232832360E-01	Hanwha(0.360674); S-Oil(0.510891)	-29.4311	0	7.56889	-48.5216	0	12.4784	-58.8622	-8.44458	6.6932	0	0	26687
237	POSCO	1.18455	19	2	-2.266803009898000E-01	Hanwha(1.194421); SK Holdings(0.178956)	1.84551	0	11.8455	48.7214	-249.784	62.9376	0.922753	0	5.92275	0	0	61504
238	Samsung Electronics	1.42686	19	5	5.975195767564130E-02	Hanwha(4.484931); SK Holdings(0.464866)	12.379	0	41.379	67.8709	-21.6915	205.179	5.5492	0	18.5492	0	0	208938
239	SK Holdings	0.712746	19	4	2.165765545777330E-02	SK Holdings(1.000000)	-6.03234	0	14.9677	-60.6106	0	150.389	-7.18135	0	17.8186	0	0	106248
240	S-Oil	1.0441	19	4	1.362655381089490E-01	S-Oil(1.000000)	0.396886	0	9.39689	0.132295	0	3.1323	0.485083	0	11.4851	0	0	27122
241	GS Caltex	0.564728	20	9	4.948039331993100E-02	GS Caltex(1.000000)	-10.4465	0	13.5535	-6.52908	0	8.47092	-21.7636	0	28.2364	0	0	38235
242	Hanwha	0.141381	20	10	3.037781875694070E-01	Hanwha(1.000000)	-48.9413	0	8.05872	-192.331	0	31.6694	-14.5965	0	2.40348	0	0	35574
243	Hyundai Motor	0.681605	20	10	1.657829293916100E-01	Hanwha(0.526016); LG Electronics(1.158149)	-9.87024	-2.1444	18.9854	-28.6555	0	61.3445	-4.13913	0	8.86087	0	0	84771
244	KEPCO	1.39179	20	3	4.776732844894030E-01	KEPCO(1.000000)	2.74253	0	9.74253	29.7761	0	105.776	94.4215	0	335.422	0	0	54252
245	KIA Motor	0.524552	20	2	-1.245344792953740E-01	GS Caltex(0.150532); LG Electronics(0.201619); S-Oil(1.012996)	-15.2143	0	16.7857	-11.8862	0	13.1138	-18.5425	0	20.4575	0	0	44730
246	KOGAS	1.30519	20	2	-2.271168517257200E-01	KEPCO(0.031121); LG Electronics(0.591231)	1.83115	0	7.83115	6.10383	0	26.1038	9.46094	-26.1443	14.3167	0	0	35411
247	LG Electronics	0.385839	20	10	-2.980482319200630E-02	LG Electronics(1.000000)	-20.2673	0	12.7327	-61.4161	0	38.5839	-10.4407	0	6.55926	0	0	57038
248	Lotte Shopping	0.204504	20	1	-5.992078982579270E-01	GS Caltex(0.320689); LG Electronics(0.252910)	-29.4333	0	7.56667	-48.5252	0	12.4748	-58.8667	-4.41934	10.714	0	0	26687
249	POSCO	1.35681	20	3	-1.319296620829180E-01	POSCO(1.000000)	3.56809	0	13.5681	94.1976	0	358.198	1.78405	0	6.78404	0	0	61504
250	Samsung Electronics	1.61364	20	8	2.972043431175060E-02	Hanwha(1.752479); LG Electronics(2.223060); POSCO(0.321873)	17.7954	0	46.7954	97.5681	0	256.568	7.97727	0	20.9773	0	0	208938
251	SK Holdings	1.12005	20	8	8.106225524075830E-02	KEPCO(0.048392); LG Electronics(1.267977); POSCO(0.508905)	2.52109	0	23.5211	25.3309	0	236.331	3.0013	0	28.0013	0	0	106248
252	S-Oil	1.33578	20	9	-5.097079299323630E-01	S-Oil(1.000000)	3.02206	0	12.0221	1.00735	0	4.00735	3.69363	0	14.6936	0	0	27122
253	GS Caltex	0.748013	21	3	-7.750701807143610E-03	GS Caltex(1.000000)	-6.04769	0	17.9523	-3.77981	0	11.2202	-12.5994	0	37.4006	0	0	38235
254	Hanwha	0.175761	21	1	-1.454950923532570E-01	Samsung Electronics(0.170261)	-46.9817	-3.35297	6.66538	-184.63	-2.82569	36.5447	-14.0121	0	2.98793	0	0	35574
255	Hyundai Motor	0.770753	21	11	-1.117383938199680E-01	LG Electronics(1.143352); Samsung Electronics(0.093599)	-7.10667	-3.96748	19.9258	-20.6323	0	69.3677	-2.98022	0	10.0198	0	0	84771
256	KEPCO	1.32847	21	2	-2.739205109269690E-01	KOGAS(1.532066)	2.29927	0	9.29927	24.9635	-69.9659	30.9976	79.1606	-272.114	48.0462	0	0	54252
257	KIA Motor	0.7415	21	2	-3.105607435603110E-02	GS Caltex(0.160651); LG Electronics(0.255146); S-Oil(0.886162)	-8.27199	0	23.728	-6.46249	0	18.5375	-10.0815	0	28.9185	0	0	44730
258	KOGAS	1.01163	21	10	-6.569639427990150E-04	KOGAS(1.000000)	0.069757	0	6.06976	0.232523	0	20.2325	0.360411	0	31.3604	0	0	35411
259	LG Electronics	0.430993	21	6	4.825173202890660E-01	LG Electronics(1.000000)	-18.7772	0	14.2228	-56.9007	0	43.0993	-9.67313	0	7.32687	0	0	57038
260	Lotte Shopping	0.231084	21	3	-2.550425747222530E-01	GS Caltex(0.280805); KOGAS(0.169666); LG Electronics(0.174311)	-28.4499	0	8.55012	-46.9039	0	14.0961	-56.8998	0	17.1002	0	0	26687
261	POSCO	1.1512	21	1	-3.877505417278180E-01	KOGAS(0.020791); Samsung Electronics(0.290841)	1.51205	0	11.512	39.918	-241.072	62.8465	0.756023	0	5.75602	0	0	61504
262	Samsung Electronics	1.34993	21	11	2.739518304343540E-01	Samsung Electronics(1.000000)	10.148	0	39.148	55.639	0	214.639	4.5491	0	17.5491	0	0	208938
263	SK Holdings	0.934286	21	7	6.368496332546260E-01	KOGAS(0.508458); Samsung Electronics(0.422341)	-1.37999	0	19.62	-13.8657	-96.1962	100.938	-1.64285	0	23.3572	0	0	106248
264	S-Oil	2.15851	21	5	4.989420955377190E-01	S-Oil(1.000000)	10.4266	0	19.4266	3.47552	0	6.47552	12.7436	0	23.7436	0	0	27122
265	GS Caltex	0.65707	22	1	9.163684611791400E-01	KOGAS(0.228125); S-Oil(1.111897)	-8.23033	0	15.7697	-5.14396	0	9.85604	-17.1465	-7.53196	25.3215	0	0	38235
266	Hanwha	0.276482	22	1	-1.516317663254970E-01	Hanwha(1.000000)	-41.2405	0	15.7595	-162.068	0	61.932	-12.2998	0	4.7002	0	0	35574
267	Hyundai Motor	1.11638	22	7	-4.283981783737480E-01	Hanwha(0.440557); LG Electronics(1.211449)	3.60776	-3.51225	31.0955	10.4741	0	100.474	1.51293	0	14.5129	0	0	84771
268	KEPCO	1.12158	22	7	2.813139285043380E-01	SK Holdings(0.510617)	0.851078	0	7.85108	9.24027	-6.35563	78.8846	29.3014	-260.955	9.34652	0	0	54252
269	KIA Motor	0.597986	22	5	3.933797049319620E-01	LG Electronics(0.002761); SK Holdings(0.056390); S-Oil(1.422504)	-12.8645	0	19.1355	-10.0504	0	14.9496	-15.6786	0	23.3214	0	0	44730
270	KOGAS	1.12012	22	6	4.333619215076190E-01	KOGAS(1.000000)	0.720707	0	6.72071	2.40236	0	22.4024	3.72365	0	34.7237	0	0	35411
271	LG Electronics	0.604149	22	3	-1.494066895541450E-01	LG Electronics(1.000000)	-13.0631	0	19.9369	-39.5851	0	60.4149	-6.72947	0	10.2705	0	0	57038
272	Lotte Shopping	0.232852	22	11	-1.492840364853940E-01	KOGAS(0.253543); SK Holdings(0.041644); S-Oil(0.489793)	-28.3845	0	8.61551	-46.796	0	14.204	-56.769	0	17.231	0	0	26687
273	POSCO	0.902045	22	12	-1.963267838927240E-01	POSCO(1.000000)	-0.979554	0	9.02045	-25.8602	0	238.14	-0.489777	0	4.51022	0	0	61504
274	Samsung Electronics	2.23707	22	5	3.040132317447140E-01	Samsung Electronics(1.000000)	35.8751	0	64.8751	196.694	0	355.694	16.0819	0	29.0819	0	0	208938
275	SK Holdings	0.732175	22	4	1.463669065301130E-01	SK Holdings(1.000000)	-5.62432	0	15.3757	-56.511	0	154.489	-6.69562	0	18.3044	0	0	106248
276	S-Oil	1.42264	22	11	2.263406897525500E-02	S-Oil(1.000000)	3.8038	0	12.8038	1.26794	0	4.26793	4.64909	0	15.6491	0	0	27122
277	GS Caltex	0.641826	23	2	2.508183451685360E-01	KIA Motor(0.854795)	-8.59616	-3.08077	12.3231	-5.3726	0	9.6274	-17.9087	-17.0726	15.0187	0	0	38235
278	Hanwha	0.217045	23	2	-3.731417333513960E-01	Hyundai Motor(0.419648)	-44.6284	-3.57289	8.79867	-175.382	-23.0735	25.5445	-13.3102	0	3.68976	0	0	35574
279	Hyundai Motor	0.676347	23	4	1.066114140170980E-01	Hyundai Motor(1.000000)	-10.0332	0	20.9668	-29.1287	0	60.8713	-4.20749	0	8.79251	0	0	84771
280	KEPCO	1.10485	23	8	7.970083360611420E-02	SK Holdings(0.510617)	0.733958	0	7.73396	7.96869	-6.26082	77.7079	25.2691	-257.062	9.20709	0	0	54252
281	KIA Motor	0.450512	23	12	3.027744102815690E-01	KIA Motor(1.000000)	-17.5836	0	14.4164	-13.7372	0	11.2628	-21.43	0	17.57	0	0	44730
282	KOGAS	1.39787	23	2	-3.258551083477390E-01	Hyundai Motor(0.375943); SK Holdings(0.033337)	2.38723	0	8.38723	7.95744	0	27.9574	12.334	-39.4274	3.90659	0	0	35411
283	LG Electronics	0.421982	23	7	7.389089793164370E-02	Hyundai Motor(0.652352); SK Holdings(0.016353)	-19.0746	0	13.9254	-57.8018	0	42.1982	-9.82631	-1.14301	6.03068	0	0	57038
284	Lotte Shopping	0.206838	23	7	-2.001783471645090E-01	Hyundai Motor(0.149204); KIA Motor(0.313858)	-29.347	0	7.65302	-48.3829	0	12.6171	-58.694	-8.47968	6.82635	0	0	26687
285	POSCO	1.41262	23	8	6.416668588950400E-01	Hyundai Motor(0.603281); SK Holdings(0.097538)	4.1262	0	14.1262	108.932	-321.366	51.5663	2.0631	0	7.0631	0	0	61504
286	Samsung Electronics	1.73418	23	2	-3.436997795315420E-01	Hyundai Motor(2.308654); SK Holdings(0.124531)	21.2912	0	50.2912	116.734	-116.252	159.482	9.54432	0	22.5443	0	0	208938
287	SK Holdings	0.721253	23	10	-5.765979967149010E-02	SK Holdings(1.000000)	-5.85369	0	15.1463	-58.8156	0	152.184	-6.96868	0	18.0313	0	0	106248
288	S-Oil	2.2764	23	5	-1.425784148133030E-01	KIA Motor(0.606349)	11.4876	-11.7462	8.74137	3.82919	0	6.8292	14.0404	-14.3868	10.6535	0	0	27122
289	GS Caltex	0.65907	24	5	8.616807805303160E-03	KIA Motor(0.854795)	-8.18232	-3.16354	12.6541	-5.11395	0	9.88605	-17.0465	-17.5313	15.4222	0	0	38235
290	Hanwha	0.182828	24	11	9.211548730465710E-02	Hanwha(1.000000)	-46.5788	0	10.4212	-183.047	0	40.9535	-13.8919	0	3.10808	0	0	35574
291	Hyundai Motor	0.718608	24	2	5.407468531057130E-01	Hanwha(0.428851); LG Electronics(1.218750)	-8.72316	-2.26082	20.016	-25.3253	0	64.6747	-3.6581	0	9.3419	0	0	84771
292	KEPCO	1.3492	24	2	-2.933307361422720E-01	KOGAS(0.927040); POSCO(0.348345)	2.44439	0	9.44439	26.5391	0	102.539	84.157	-290.737	34.4202	0	0	54252
293	KIA Motor	0.462616	24	6	4.256879560519280E-01	KIA Motor(1.000000)	-17.1963	0	14.8037	-13.4346	0	11.5654	-20.958	0	18.042	0	0	44730
294	KOGAS	1.14412	24	4	5.085282560822230E-01	KOGAS(1.000000)	0.864701	0	6.8647	2.88234	0	22.8823	4.46762	0	35.4676	0	0	35411
295	LG Electronics	0.386558	24	10	-3.492114170911400E-02	LG Electronics(1.000000)	-20.2436	0	12.7564	-61.3442	0	38.6558	-10.4285	0	6.57149	0	0	57038
296	Lotte Shopping	0.19548	24	8	-1.843808630989070E-01	KIA Motor(0.314746); KOGAS(0.233664); LG Electronics(0.075987)	-29.7672	0	7.23276	-49.0757	0	11.9243	-59.5345	0	14.4655	0	0	26687
297	POSCO	0.884337	24	12	-1.045360211730150E-01	POSCO(1.000000)	-1.15663	0	8.84337	-30.535	0	233.465	-0.578314	0	4.42169	0	0	61504
298	Samsung Electronics	1.64347	24	5	2.939417298597980E-01	Hanwha(1.380246); LG Electronics(2.259943); POSCO(0.502968)	18.6605	0	47.6605	102.311	0	261.311	8.36506	0	21.3651	0	0	208938
299	SK Holdings	0.952315	24	3	-3.253070296723230E-01	KOGAS(0.425789); LG Electronics(0.870820); POSCO(0.674762)	-1.00137	0	19.9986	-10.0614	0	200.939	-1.19211	0	23.8079	0	0	106248
300	S-Oil	2.33756	24	8	1.461192741638510E-01	KIA Motor(0.606349)	12.038	-12.0618	8.97622	4.01267	0	7.01267	14.7131	-14.7734	10.9398	0	0	27122
301	GS Caltex	0.508402	25	4	-1.869142257594490E-01	GS Caltex(1.000000)	-11.7983	0	12.2017	-7.37397	0	7.62603	-24.5799	0	25.4201	0	0	38235
302	Hanwha	0.138337	25	6	2.313257454576850E-01	Hanwha(1.000000)	-49.1148	0	7.88521	-193.013	0	30.9875	-14.6483	0	2.35173	0	0	35574
303	Hyundai Motor	0.683044	25	6	1.853279425791960E-01	Hyundai Motor(1.000000)	-9.82564	0	21.1744	-28.5261	0	61.4739	-4.12043	0	8.87957	0	0	84771
304	KEPCO	1.20663	25	7	-2.930135378217010E-03	Samsung Electronics(0.259656)	1.4464	0	8.4464	15.7037	-45.3942	46.3095	49.7973	-287.011	3.78632	0	0	54252
305	KIA Motor	0.440576	25	8	1.885311545581570E-01	GS Caltex(0.081523); Samsung Electronics(0.035968); S-Oil(1.257207)	-17.9016	0	14.0984	-13.9856	0	11.0144	-21.8175	0	17.1825	0	0	44730
306	KOGAS	1.14895	25	9	1.019926084928060E-01	KOGAS(1.000000)	0.893727	0	6.89373	2.97909	0	22.9791	4.61759	0	35.6176	0	0	35411
307	LG Electronics	0.405149	25	6	2.680804253797100E-01	Hyundai Motor(0.457286); Samsung Electronics(0.066712); S-Oil(0.159825)	-19.6301	0	13.3699	-59.4851	0	40.5149	-10.1125	0	6.88753	0	0	57038
308	Lotte Shopping	0.187937	25	1	-5.433507006321870E-02	GS Caltex(0.433317); KOGAS(0.065955); Samsung Electronics(0.037253)	-30.0463	0	6.95367	-49.5358	0	11.4642	-60.0927	0	13.9073	0	0	26687
309	POSCO	0.957545	25	3	-6.895447494140380E-01	Samsung Electronics(0.294365)	-0.424555	0	9.57545	-11.2082	-200.292	52.4999	-0.212277	-0.495282	4.29244	0	0	61504
310	Samsung Electronics	1.1217	25	10	-4.514453849291850E-01	Samsung Electronics(1.000000)	3.52917	0	32.5292	19.3496	0	178.35	1.58204	0	14.582	0	0	208938
311	SK Holdings	0.787693	25	7	-1.612971692163020E-02	Samsung Electronics(0.508514)	-4.45844	0	16.5416	-44.7967	-75.5099	90.6934	-5.30767	-12.2771	7.41518	0	0	106248
312	S-Oil	1.05469	25	4	-2.004626258104260E-01	S-Oil(1.000000)	0.492255	0	9.49226	0.164085	0	3.16409	0.601645	0	11.6016	0	0	27122
313	GS Caltex	0.500246	26	5	-3.351199346736330E-01	Samsung Electronics(0.022693); S-Oil(1.234919)	-11.9941	0	12.0059	-7.49631	0	7.50369	-24.9877	-10.8647	14.1476	0	0	38235
314	Hanwha	0.134535	26	3	-3.706912977382440E-01	Samsung Electronics(0.170261)	-49.3315	-2.56651	5.10198	-193.864	-2.16291	27.9729	-14.7129	0	2.28709	0	0	35574
315	Hyundai Motor	0.670573	26	5	2.560513019438990E-01	Samsung Electronics(0.360915); S-Oil(0.345185)	-10.2122	-6.8069	13.9809	-29.6485	0	60.3515	-4.28255	0	8.71745	0	0	84771
316	KEPCO	1.11154	26	9	-1.262239463812010E-01	Samsung Electronics(0.259656)	0.78075	0	7.78075	8.47671	-41.8167	42.66	26.8801	-264.392	3.48792	0	0	54252
317	KIA Motor	0.422744	26	6	-1.499782467679500E-01	Samsung Electronics(0.039268); S-Oil(1.346706)	-18.4722	0	13.5278	-14.4314	0	10.5686	-22.513	-0.863731	15.6233	0	0	44730
318	KOGAS	1.11428	26	9	7.219293620076050E-02	Samsung Electronics(0.129982); S-Oil(0.304282)	0.685677	0	6.68568	2.28559	0	22.2856	3.54266	-29.3858	5.15686	0	0	35411
319	LG Electronics	0.390993	26	11	-2.299164592474160E-01	Samsung Electronics(0.232126); S-Oil(0.314804)	-20.0972	-3.05981	9.84296	-60.9007	0	39.0993	-10.3531	0	6.64688	0	0	57038
320	Lotte Shopping	0.181092	26	4	-3.831187884276150E-01	Samsung Electronics(0.057115); S-Oil(0.543969)	-30.2996	0	6.70041	-49.9534	0	11.0466	-60.5992	-6.53603	6.8648	0	0	26687
321	POSCO	0.882082	26	9	-4.672919535007070E-02	Samsung Electronics(0.294365)	-1.17918	0	8.82082	-31.1303	-184.507	48.3624	-0.589589	-0.456249	3.95416	0	0	61504
322	Samsung Electronics	1.0333	26	4	1.212573000866160E-01	Samsung Electronics(1.000000)	0.96561	0	29.9656	5.29421	0	164.294	0.43286	0	13.4329	0	0	208938
323	SK Holdings	0.725617	26	12	-2.150263386444230E-01	Samsung Electronics(0.508514)	-5.76205	0	15.2379	-57.8949	-69.5591	83.546	-6.85959	-11.3096	6.8308	0	0	106248
324	S-Oil	1.01904	26	4	6.124904988905120E-02	S-Oil(1.000000)	0.17135	0	9.17135	0.057117	0	3.05712	0.209427	0	11.2094	0	0	27122
325	GS Caltex	0.614901	27	7	1.009230963113950E-01	KIA Motor(0.854795)	-9.24237	-2.95153	11.8061	-5.77648	0	9.22352	-19.2549	-16.3564	14.3887	0	0	38235
326	Hanwha	0.134222	27	1	-1.778820064027530E-01	Samsung Electronics(0.170261)	-49.3493	-2.56054	5.09011	-193.934	-2.15788	27.9078	-14.7182	0	2.28177	0	0	35574
327	Hyundai Motor	0.674508	27	5	1.977124872718990E-01	KIA Motor(0.238563); Samsung Electronics(0.354651)	-10.0902	-7.0122	13.8976	-29.2942	0	60.7058	-4.23139	0	8.76861	0	0	84771
328	KEPCO	1.08345	27	6	3.009811476990070E-01	KEPCO(1.000000)	0.584184	0	7.58418	6.34257	0	82.3426	20.1126	0	261.113	0	0	54252
329	KIA Motor	0.431613	27	4	1.508315516077860E-01	KIA Motor(1.000000)	-18.1884	0	13.8116	-14.2097	0	10.7903	-22.1671	0	16.8329	0	0	44730
330	KOGAS	1.11898	27	11	2.833140187227000E-01	KIA Motor(0.222235); Samsung Electronics(0.121904)	0.713867	0	6.71387	2.37956	0	22.3796	3.68831	-29.3137	5.37458	0	0	35411
331	LG Electronics	0.394439	27	7	3.772827772767090E-02	KIA Motor(0.218203); Samsung Electronics(0.226276)	-19.9835	-3.23801	9.77849	-60.5561	0	39.4439	-10.2945	0	6.70547	0	0	57038
332	Lotte Shopping	0.183507	27	9	3.185019810615540E-02	KIA Motor(0.400901); Samsung Electronics(0.041901)	-30.2102	0	6.78976	-49.8061	0	11.1939	-60.4205	-6.26965	7.30987	0	0	26687
333	POSCO	0.879999	27	4	1.062438497744010E-01	KEPCO(0.001766); Samsung Electronics(0.293906)	-1.20001	0	8.79999	-31.6802	-184	48.3202	-0.600004	0	4.4	0	0	61504
334	Samsung Electronics	1.03089	27	6	-9.243309103729650E-02	Samsung Electronics(1.000000)	0.895918	0	29.8959	4.9121	0	163.912	0.401618	0	13.4016	0	0	208938
335	SK Holdings	0.723557	27	7	7.396875054883400E-01	KEPCO(0.043760); Samsung Electronics(0.497152)	-5.8053	0	15.1947	-58.3295	-67.578	85.0925	-6.91108	0	18.0889	0	0	106248
336	S-Oil	2.1809	27	8	-3.701911632586600E-02	KIA Motor(0.606349)	10.6281	-11.2535	8.37466	3.54271	0	6.5427	12.9899	-13.7833	10.2066	0	0	27122
337	GS Caltex	0.521654	28	12	-2.774091256246890E-01	GS Caltex(1.000000)	-11.4803	0	12.5197	-7.17519	0	7.82481	-23.9173	0	26.0827	0	0	38235
338	Hanwha	0.204614	28	1	-2.758674114265880E-02	Hyundai Motor(0.340205); POSCO(0.109497)	-45.337	-3.55063	8.11239	-178.166	0	45.8336	-13.5216	0	3.47844	0	0	35574
339	Hyundai Motor	0.679298	28	6	-1.454857758557400E-01	Hyundai Motor(1.000000)	-9.94176	0	21.0582	-28.8632	0	61.1368	-4.16912	0	8.83088	0	0	84771
340	KEPCO	1.10987	28	12	3.927732253879590E-01	KEPCO(1.000000)	0.76912	0	7.76912	8.35044	0	84.3504	26.4797	0	267.48	0	0	54252
341	KIA Motor	0.608541	28	8	-1.858694682338870E-01	GS Caltex(0.863065); Hyundai Motor(0.138381)	-12.5267	-5.75393	13.7194	-9.78648	0	15.2135	-15.2669	0	23.7331	0	0	44730
380	Lotte Shopping	0.186349	31	3	-3.636579009410330E-01	KIA Motor(0.397310); Samsung Electronics(0.042670)	-30.1051	0	6.89491	-49.6327	0	11.3673	-60.2102	-6.36674	7.42307	0	0	26687
381	POSCO	0.869121	31	4	3.016867442937590E-02	POSCO(1.000000)	-1.30879	0	8.69121	-34.552	0	229.448	-0.654394	0	4.34561	0	0	61504
382	Samsung Electronics	1.028	31	4	-7.152144695068540E-02	Samsung Electronics(1.000000)	0.811961	0	29.812	4.45179	0	163.452	0.363983	0	13.364	0	0	208938
383	SK Holdings	0.72037	31	2	-4.870610955372550E-01	POSCO(0.379855); Samsung Electronics(0.396699)	-5.87224	0	15.1278	-59.002	0	151.998	-6.99076	-11.0571	6.95217	0	0	106248
384	S-Oil	2.23469	31	8	1.169028309140520E-01	KIA Motor(0.606349)	11.1122	-11.531	8.58122	3.70408	0	6.70408	13.5816	-14.1233	10.4584	0	0	27122
385	GS Caltex	0.6821	32	7	4.917131021639630E-01	KIA Motor(0.597630); S-Oil(0.424120)	-7.62961	0	16.3704	-4.76851	0	10.2315	-15.895	-14.1337	19.9712	0	0	38235
386	Hanwha	0.138083	32	3	-1.857431276415820E-02	Samsung Electronics(0.170261)	-49.1293	-2.63421	5.23654	-193.069	-2.21996	28.7107	-14.6526	0	2.34742	0	0	35574
387	Hyundai Motor	0.682565	32	7	1.123116938221250E-01	LG Electronics(1.099732); Samsung Electronics(0.105507)	-9.8405	-3.51353	17.646	-28.5692	0	61.4308	-4.12666	0	8.87334	0	0	84771
388	KEPCO	1.11483	32	3	1.504069755481040E-01	SK Holdings(0.510617)	0.803842	0	7.80384	8.72742	-6.3174	78.41	27.6751	-259.385	9.29029	0	0	54252
389	KIA Motor	0.557399	32	11	2.505517401281690E-01	KIA Motor(1.000000)	-14.1632	0	17.8368	-11.065	0	13.935	-17.2615	0	21.7385	0	0	44730
390	KOGAS	1.22088	32	3	5.150993508243500E-02	KIA Motor(0.187755); Samsung Electronics(0.129286)	1.32525	0	7.32525	4.41751	0	24.4175	6.84714	-31.9831	5.86401	0	0	35411
391	LG Electronics	0.396818	32	10	1.637999056477450E-01	LG Electronics(1.000000)	-19.905	0	13.095	-60.3182	0	39.6818	-10.2541	0	6.74591	0	0	57038
392	Lotte Shopping	0.218671	32	11	6.413600551640770E-02	KIA Motor(0.369918); Samsung Electronics(0.048534)	-28.9092	0	8.09084	-47.661	0	13.339	-57.8183	-7.47106	8.71062	0	0	26687
393	POSCO	0.903878	32	11	-3.409136895507110E-01	Samsung Electronics(0.273406); SK Holdings(0.041216)	-0.961224	0	9.03878	-25.3763	-186.191	52.4329	-0.480612	0	4.51939	0	0	61504
394	Samsung Electronics	1.06055	32	6	-2.198024162773510E-01	Samsung Electronics(1.000000)	1.75598	0	30.756	9.62759	0	168.628	0.787162	0	13.7872	0	0	208938
395	SK Holdings	0.72777	32	10	-1.293389816868680E-01	SK Holdings(1.000000)	-5.71683	0	15.2832	-57.4405	0	153.559	-6.80575	0	18.1943	0	0	106248
396	S-Oil	1.49606	32	11	-2.077707376872250E-01	S-Oil(1.000000)	4.46458	0	13.4646	1.48819	0	4.48819	5.45671	0	16.4567	0	0	27122
397	GS Caltex	0.510927	33	4	-1.981992485347890E-01	GS Caltex(1.000000)	-11.7377	0	12.2623	-7.33609	0	7.66391	-24.4536	0	25.5464	0	0	38235
398	Hanwha	0.144916	33	10	4.111366212334420E-01	Hanwha(1.000000)	-48.7398	0	8.26021	-191.539	0	32.4612	-14.5364	0	2.46357	0	0	35574
399	Hyundai Motor	0.759963	33	9	-3.688804378555020E-01	Hanwha(2.066805); S-Oil(0.414663)	-7.44113	-2.56933	20.9895	-21.6033	0	68.3967	-3.12047	0	9.87952	0	0	84771
400	KEPCO	1.0996	33	1	1.669054135927850E-01	SK Holdings(0.510617)	0.697209	0	7.69721	7.5697	-6.23107	77.3386	24.0039	-255.841	9.16334	0	0	54252
401	KIA Motor	0.456001	33	7	-3.526515215261510E-01	GS Caltex(0.141881); Hanwha(0.202929); S-Oil(1.183032)	-17.408	0	14.592	-13.6	0	11.4	-21.216	0	17.784	0	0	44730
402	KOGAS	1.3894	33	8	-1.900147845838340E-01	GS Caltex(0.484437); SK Holdings(0.158954)	2.33642	0	8.33642	7.78806	0	27.7881	12.0715	-27.8434	15.2281	0	0	35411
403	LG Electronics	0.441163	33	1	3.721967089499100E-02	Hanwha(1.323430); S-Oil(0.367167)	-18.4416	-0.157963	14.4004	-55.8837	0	44.1163	-9.50023	0	7.49977	0	0	57038
404	Lotte Shopping	0.203457	33	5	-2.035605341341530E-03	GS Caltex(0.547217); SK Holdings(0.054252)	-29.4721	0	7.52792	-48.5891	0	12.4109	-58.9442	-0.102864	14.953	0	0	26687
405	POSCO	0.953753	33	6	4.266473839605770E-01	POSCO(1.000000)	-0.462474	0	9.53753	-12.2093	0	251.791	-0.231237	0	4.76876	0	0	61504
406	Samsung Electronics	1.49927	33	2	4.043144495844280E-01	Hanwha(4.277289); POSCO(0.113329); SK Holdings(0.468786)	14.4788	0	43.4788	79.3839	0	238.384	6.49051	0	19.4905	0	0	208938
407	SK Holdings	0.717826	33	6	6.451132434122340E-02	SK Holdings(1.000000)	-5.92566	0	15.0743	-59.5388	0	151.461	-7.05436	0	17.9456	0	0	106248
408	S-Oil	1.04966	33	6	-1.707579686930500E-01	S-Oil(1.000000)	0.446935	0	9.44693	0.148978	0	3.14898	0.546254	0	11.5463	0	0	27122
409	GS Caltex	0.528968	34	8	-1.349239359573840E-02	KIA Motor(0.584782); S-Oil(0.445310)	-11.3048	0	12.6952	-7.06547	0	7.93453	-23.5516	-10.9607	15.4877	0	0	38235
410	Hanwha	0.138576	34	1	1.348050744006530E-01	Samsung Electronics(0.170261)	-49.1012	-2.6436	5.25523	-192.959	-2.22788	28.8132	-14.6442	0	2.35579	0	0	35574
411	Hyundai Motor	0.694557	34	12	-3.435576090400640E-01	Samsung Electronics(0.362923); S-Oil(0.329720)	-9.46872	-7.05037	14.4809	-27.4898	0	62.5102	-3.97075	0	9.02925	0	0	84771
412	KEPCO	1.14492	34	1	-1.454601299756190E-01	Samsung Electronics(0.259656)	1.01447	0	8.01447	11.0142	-43.0728	43.9414	34.9267	-272.334	3.59269	0	0	54252
413	KIA Motor	0.44176	34	9	4.461088261096550E-01	KIA Motor(1.000000)	-17.8637	0	14.1363	-13.956	0	11.044	-21.7714	0	17.2286	0	0	44730
414	KOGAS	1.15245	34	9	-1.868589097390030E-01	KIA Motor(0.223627); Samsung Electronics(0.121606)	0.914726	0	6.91473	3.04909	0	23.0491	4.72608	-30.1907	5.53537	0	0	35411
415	LG Electronics	0.40578	34	11	6.677037898955010E-02	Samsung Electronics(0.233879); S-Oil(0.301296)	-19.6093	-3.17553	10.2152	-59.422	0	40.578	-10.1017	0	6.89826	0	0	57038
416	Lotte Shopping	0.188356	34	7	3.882795045558150E-01	KIA Motor(0.402042); Samsung Electronics(0.041657)	-30.0308	0	6.96916	-49.5103	0	11.4897	-60.0617	-6.4353	7.50301	0	0	26687
417	POSCO	0.908578	34	6	-7.259027226739630E-01	Samsung Electronics(0.294365)	-0.914216	0	9.08578	-24.1353	-190.05	49.8152	-0.457108	-0.469954	4.07294	0	0	61504
418	Samsung Electronics	1.06434	34	4	2.307252957250910E-01	Samsung Electronics(1.000000)	1.86572	0	30.8657	10.2293	0	169.229	0.836359	0	13.8364	0	0	208938
419	SK Holdings	0.747413	34	8	-2.212301637385080E-01	Samsung Electronics(0.508514)	-5.30433	0	15.6957	-53.2959	-71.6485	86.0556	-6.31468	-11.6493	7.03599	0	0	106248
420	S-Oil	1.10499	34	6	3.839252495215580E-01	S-Oil(1.000000)	0.944926	0	9.94493	0.314975	0	3.31498	1.15491	0	12.1549	0	0	27122
421	GS Caltex	0.569784	35	8	1.969794541914810E-01	KIA Motor(0.630303); S-Oil(0.370236)	-10.3252	0	13.6748	-6.45324	0	8.54676	-21.5108	-11.8065	16.6828	0	0	38235
422	Hanwha	0.245801	35	3	-8.167461880797640E-01	Hanwha(1.000000)	-42.9894	0	14.0106	-168.941	0	55.0593	-12.8214	0	4.17861	0	0	35574
423	Hyundai Motor	1.10703	35	2	3.746680925090300E-01	Hanwha(0.491397); LG Electronics(1.179740)	3.31784	-3.48283	30.835	9.63244	0	99.6324	1.39135	0	14.3914	0	0	84771
424	KEPCO	1.05374	35	12	-1.839093435634480E-01	KEPCO(1.000000)	0.376187	0	7.37619	4.08431	0	80.0843	12.9516	0	253.952	0	0	54252
425	KIA Motor	0.441481	35	10	2.438813741925970E-01	KIA Motor(1.000000)	-17.8726	0	14.1274	-13.963	0	11.037	-21.7822	0	17.2178	0	0	44730
426	KOGAS	1.32421	35	1	-2.905602529458470E-01	KEPCO(0.106738); Lotte Shopping(1.051883); POSCO(0.025179)	1.94524	0	7.94524	6.48412	0	26.4841	10.0504	0	41.0504	0	0	35411
427	LG Electronics	0.61519	35	3	-2.258542551419840E-01	LG Electronics(1.000000)	-12.6987	0	20.3013	-38.481	0	61.519	-6.54177	0	10.4582	0	0	57038
428	Lotte Shopping	0.177546	35	6	8.584215457827640E-02	Lotte Shopping(1.000000)	-30.4308	0	6.56921	-50.1697	0	10.8303	-60.8616	0	13.1384	0	0	26687
429	POSCO	0.984429	35	10	-5.470358309739470E-01	POSCO(1.000000)	-0.15571	0	9.84429	-4.11074	0	259.889	-0.077855	0	4.92215	0	0	61504
430	Samsung Electronics	2.36314	35	7	-1.578376933456980E-01	Hanwha(1.476203); LG Electronics(2.041890); POSCO(0.649685)	39.5312	0	68.5312	216.74	0	375.74	17.7209	0	30.7209	0	0	208938
431	SK Holdings	1.12205	35	5	-1.413519495350550E-02	LG Electronics(0.248951); Lotte Shopping(1.643344); POSCO(0.783566)	2.56314	0	23.5631	25.7534	0	236.753	3.05136	0	28.0514	0	0	106248
432	S-Oil	1.4316	35	11	-4.844988604334880E-03	S-Oil(1.000000)	3.88444	0	12.8844	1.29481	0	4.29481	4.74765	0	15.7477	0	0	27122
433	GS Caltex	0.67602	36	5	-3.865555137453200E-01	Lotte Shopping(0.522777); S-Oil(0.895349)	-7.77553	0	16.2245	-4.8597	0	10.1403	-16.199	-11.1728	22.6281	0	0	38235
434	Hanwha	0.132723	36	6	2.054664471953190E-01	Samsung Electronics(0.170261)	-49.4348	-2.53194	5.03325	-194.27	-2.13377	27.5961	-14.7437	0	2.25629	0	0	35574
435	Hyundai Motor	0.688807	36	2	2.151760382373250E-01	Samsung Electronics(0.375791); S-Oil(0.230588)	-9.64699	-6.99199	14.361	-28.0074	0	61.9926	-4.04551	0	8.95449	0	0	84771
436	KEPCO	1.09335	36	4	-3.422057973548340E-01	KEPCO(1.000000)	0.653431	0	7.65343	7.0944	0	83.0944	22.4967	0	263.497	0	0	54252
437	KIA Motor	0.579377	36	5	2.473151256127960E-01	Lotte Shopping(0.176335); Samsung Electronics(0.044067); S-Oil(1.136230)	-13.4599	0	18.5401	-10.5156	0	14.4844	-16.4043	0	22.5957	0	0	44730
438	KOGAS	1.11788	36	11	1.290625518352640E-01	Lotte Shopping(0.546379); Samsung Electronics(0.099694)	0.707287	0	6.70729	2.35762	0	22.3576	3.65431	-25.8129	8.84142	0	0	35411
439	LG Electronics	0.407596	36	5	1.088490366593390E-01	Samsung Electronics(0.245286); S-Oil(0.213419)	-19.5493	-3.18973	10.2609	-59.2404	0	40.7596	-10.0709	0	6.92912	0	0	57038
440	Lotte Shopping	0.185998	36	6	2.873583308840340E-01	Lotte Shopping(1.000000)	-30.1181	0	6.88194	-49.6541	0	11.3459	-60.2361	0	13.7639	0	0	26687
441	POSCO	0.870197	36	6	5.082270304252350E-02	KEPCO(0.001731); Samsung Electronics(0.293915)	-1.29803	0	8.70197	-34.268	-181.95	47.782	-0.649016	0	4.35098	0	0	61504
442	Samsung Electronics	1.01938	36	10	4.808843959595940E-02	Samsung Electronics(1.000000)	0.56198	0	29.562	3.0812	0	162.081	0.251922	0	13.2519	0	0	208938
443	SK Holdings	0.715797	36	1	1.374731738838170E-01	KEPCO(0.042899); Samsung Electronics(0.497376)	-5.96827	0	15.0317	-59.9669	-66.8532	84.1799	-7.10508	0	17.8949	0	0	106248
444	S-Oil	1.56696	36	3	-8.621188562143890E-02	S-Oil(1.000000)	5.10261	0	14.1026	1.70087	0	4.70087	6.23652	0	17.2365	0	0	27122
445	GS Caltex	0.580249	37	8	-3.210114994695260E-01	KIA Motor(0.594350); S-Oil(0.429530)	-10.074	0	13.926	-6.29626	0	8.70374	-20.9875	-12.0233	16.9892	0	0	38235
446	Hanwha	0.13501	37	8	2.435382508399480E-01	Samsung Electronics(0.170261)	-49.3044	-2.57558	5.12001	-193.758	-2.17055	28.0718	-14.7048	0	2.29518	0	0	35574
447	Hyundai Motor	0.686195	37	10	3.213283985774290E-01	KIA Motor(0.219703); Samsung Electronics(0.358689)	-9.72794	-7.1337	14.1384	-28.2424	0	61.7576	-4.07946	0	8.92054	0	0	84771
448	KEPCO	1.11255	37	2	2.550365665733980E-01	POSCO(0.228351); Samsung Electronics(0.192438)	0.787879	0	7.78788	8.55412	0	84.5541	27.1256	-264.531	3.59462	0	0	54252
449	KIA Motor	0.476785	37	6	5.518686800203650E-01	KIA Motor(1.000000)	-16.7429	0	15.2571	-13.0804	0	11.9196	-20.4054	0	18.5946	0	0	44730
450	KOGAS	1.15453	37	8	6.390239029612210E-01	KIA Motor(0.207573); Samsung Electronics(0.125043)	0.927207	0	6.92721	3.09069	0	23.0907	4.79057	-30.2452	5.54536	0	0	35411
451	LG Electronics	0.402922	37	1	-3.805016123282540E-01	KIA Motor(0.201778); Samsung Electronics(0.229793)	-19.7036	-3.30765	9.98878	-59.7078	0	40.2922	-10.1503	0	6.84968	0	0	57038
452	Lotte Shopping	0.196386	37	11	2.236091949858290E-02	KIA Motor(0.388388); Samsung Electronics(0.044580)	-29.7337	0	7.26627	-49.0205	0	11.9795	-59.4675	-6.70966	7.82289	0	0	26687
453	POSCO	0.876277	37	12	7.379593595471330E-02	POSCO(1.000000)	-1.23723	0	8.76277	-32.6629	0	231.337	-0.618616	0	4.38138	0	0	61504
454	Samsung Electronics	1.03695	37	6	1.168211925392650E-01	Samsung Electronics(1.000000)	1.07155	0	30.0715	5.87504	0	164.875	0.480349	0	13.4803	0	0	208938
455	SK Holdings	0.726567	37	10	3.533878094826870E-01	POSCO(0.379994); Samsung Electronics(0.396658)	-5.74209	0	15.2579	-57.6944	0	153.306	-6.83582	-11.1522	7.01198	0	0	106248
193	GS Caltex	0.527028	16	8	1.224818199958740E+00	KIA Motor(0.588945); S-Oil(0.438445)	-11.3513	0	12.6487	-7.09458	0	7.90542	-23.6486	-10.9205	15.4309	0	0	38235
194	Hanwha	0.137025	16	9	-6.215343058795170E-01	Samsung Electronics(0.170261)	-49.1895	-2.61402	5.19643	-193.306	-2.20295	28.4908	-14.6706	0	2.32943	0	0	35574
195	Hyundai Motor	0.666962	16	11	1.736175102563810E-01	LG Electronics(1.105652); Samsung Electronics(0.103891)	-10.3242	-3.43321	17.2426	-29.9735	0	60.0265	-4.3295	0	8.6705	0	0	84771
196	KEPCO	1.01863	16	10	6.280837195050330E-02	KEPCO(1.000000)	0.130418	0	7.13042	1.41597	0	77.416	4.49011	0	245.49	0	0	54252
197	KIA Motor	0.437029	16	4	-2.255085623304650E-01	KIA Motor(1.000000)	-18.0151	0	13.9849	-14.0743	0	10.9257	-21.9559	0	17.0441	0	0	44730
198	KOGAS	1.09167	16	10	-3.538801566437740E-01	KOGAS(1.000000)	0.550007	0	6.55001	1.83336	0	21.8334	2.84171	0	33.8417	0	0	35411
199	LG Electronics	0.385671	16	4	-5.637676487345430E-02	LG Electronics(1.000000)	-20.2728	0	12.7272	-61.4329	0	38.5671	-10.4436	0	6.55641	0	0	57038
200	Lotte Shopping	0.18375	16	9	4.419477436960820E-01	Lotte Shopping(1.000000)	-30.2012	0	6.79876	-49.7912	0	11.2088	-60.4025	0	13.5975	0	0	26687
201	POSCO	0.897795	16	3	-4.384546373340810E-01	Samsung Electronics(0.273662); SK Holdings(0.040712)	-1.02205	0	8.97795	-26.9821	-184.938	52.0801	-0.511024	0	4.48898	0	0	61504
202	Samsung Electronics	1.05243	16	10	2.025131744033520E-01	Samsung Electronics(1.000000)	1.52036	0	30.5204	8.33578	0	167.336	0.681542	0	13.6815	0	0	208938
203	SK Holdings	0.731833	16	9	5.438688183742950E-01	SK Holdings(1.000000)	-5.6315	0	15.3685	-56.5832	0	154.417	-6.70417	0	18.2958	0	0	106248
204	S-Oil	1.11818	16	4	-4.501181141761450E-01	S-Oil(1.000000)	1.06359	0	10.0636	0.354528	0	3.35453	1.29994	0	12.2999	0	0	27122
205	GS Caltex	0.553342	17	6	-5.150823519903100E-01	GS Caltex(1.000000)	-10.7198	0	13.2802	-6.69988	0	8.30012	-22.3329	0	27.6671	0	0	38235
206	Hanwha	0.131549	17	10	-1.926283695689110E-03	Hanwha(1.000000)	-49.5017	0	7.4983	-194.533	0	29.467	-14.7637	0	2.23634	0	0	35574
207	Hyundai Motor	0.73336	17	8	-4.007307619609540E-01	Lotte Shopping(0.338128); Samsung Electronics(0.362535)	-8.26583	-9.14485	13.5893	-23.9976	0	66.0024	-3.46632	0	9.53368	0	0	84771
208	KEPCO	1.16347	17	8	-1.692193878608250E-01	Samsung Electronics(0.259656)	1.14431	0	8.14431	12.4239	-43.7706	44.6533	39.3969	-276.746	3.6509	0	0	54252
209	KIA Motor	0.635029	17	8	-1.100773093558880E-01	GS Caltex(0.312935); Lotte Shopping(1.227749)	-11.6791	-8.11102	12.2099	-9.12428	0	15.8757	-14.2339	0	24.7661	0	0	44730
210	KOGAS	1.13332	17	8	-9.911738465026040E-02	Lotte Shopping(0.581106); Samsung Electronics(0.095258)	0.799912	0	6.79991	2.66637	0	22.6664	4.13288	-26.1694	8.96352	0	0	35411
211	LG Electronics	0.434524	17	9	9.453663332203620E-02	Lotte Shopping(0.313359); Samsung Electronics(0.232966)	-18.6607	-4.97649	9.36279	-56.5476	0	43.4524	-9.6131	0	7.3869	0	0	57038
342	KOGAS	1.41008	28	5	-1.138454048134810E-01	Hyundai Motor(0.380039); KEPCO(0.058887)	2.46045	0	8.46045	8.2015	0	28.2015	12.7123	-24.6052	19.1071	0	0	35411
343	LG Electronics	0.427028	28	11	-2.090526542138560E-01	Hyundai Motor(0.664327); KEPCO(0.005090); POSCO(0.007255)	-18.9081	0	14.0919	-57.2972	0	42.7028	-9.74052	0	7.25948	0	0	57038
344	Lotte Shopping	0.206636	28	2	-1.975180754351790E-01	GS Caltex(0.336291); Hyundai Motor(0.163133)	-29.3545	0	7.64555	-48.3952	0	12.6048	-58.7089	-5.07911	10.212	0	0	26687
345	POSCO	0.866031	28	10	1.787290849157120E-02	POSCO(1.000000)	-1.33969	0	8.66031	-35.3677	0	228.632	-0.669843	0	4.33016	0	0	61504
346	Samsung Electronics	1.6508	28	1	1.607243999450880E-01	Hyundai Motor(2.022908); KEPCO(0.003639); POSCO(0.605760)	18.8732	0	47.8732	103.477	0	262.477	8.46041	0	21.4604	0	0	208938
347	SK Holdings	1.01128	28	5	-4.022539085752610E-02	Hyundai Motor(0.687186); KEPCO(0.060056); POSCO(0.727374)	0.236799	0	21.2368	2.37926	0	213.379	0.281903	0	25.2819	0	0	106248
348	S-Oil	1.85018	28	7	3.805549425460580E-02	GS Caltex(0.709350)	7.6516	-7.77074	8.88085	2.55053	0	5.55053	9.35195	-1.85018	18.5018	0	0	27122
349	GS Caltex	0.515407	29	12	2.155614415104210E-01	GS Caltex(1.000000)	-11.6302	0	12.3698	-7.26889	0	7.73111	-24.2296	0	25.7704	0	0	38235
350	Hanwha	0.224653	29	1	4.683471817454730E-01	Samsung Electronics(0.170261)	-44.1948	-4.28569	8.51954	-173.678	-3.61173	46.7106	-13.1809	0	3.8191	0	0	35574
351	Hyundai Motor	1.10302	29	3	-6.059200234106170E-01	Lotte Shopping(0.500473); Samsung Electronics(0.341799)	3.19362	-13.7544	20.4392	9.27181	0	99.2718	1.33926	0	14.3393	0	0	84771
352	KEPCO	1.8561	29	5	2.668400234278500E-01	Samsung Electronics(0.259656)	5.99269	0	12.9927	65.0635	-69.8277	71.2358	206.32	-441.496	5.82431	0	0	54252
353	KIA Motor	0.629969	29	5	7.703269382252870E-04	GS Caltex(0.333290); Lotte Shopping(1.198586)	-11.841	-8.04639	12.1126	-9.25078	0	15.7492	-14.4312	0	24.5688	0	0	44730
354	KOGAS	1.44687	29	5	3.313951140188420E-01	Lotte Shopping(0.730071); Samsung Electronics(0.076231)	2.68119	0	8.68119	8.9373	0	28.9373	13.8528	-33.4094	11.4434	0	0	35411
355	LG Electronics	0.639743	29	5	-4.946515309717530E-01	Lotte Shopping(0.454013); Samsung Electronics(0.215000)	-11.8885	-7.32682	13.7847	-36.0257	0	63.9743	-6.12437	0	10.8756	0	0	57038
356	Lotte Shopping	0.180165	29	12	1.324983887739400E-01	Lotte Shopping(1.000000)	-30.3339	0	6.6661	-50.0099	0	10.9901	-60.6678	0	13.3322	0	0	26687
357	POSCO	1.47295	29	8	5.991036996210800E-04	Samsung Electronics(0.294365)	4.72946	0	14.7295	124.858	-308.1	80.7581	2.36473	-0.761869	6.60286	0	0	61504
358	Samsung Electronics	1.72545	29	3	-4.523097122580200E-01	Samsung Electronics(1.000000)	21.0381	0	50.0381	115.347	0	274.347	9.43088	0	22.4309	0	0	208938
359	SK Holdings	1.21167	29	8	-4.744915402718910E-01	Samsung Electronics(0.508514)	4.4451	0	25.4451	44.6627	-116.153	139.509	5.29179	-18.8854	11.4064	0	0	106248
360	S-Oil	1.82802	29	2	3.231871151892400E-01	GS Caltex(0.709350)	7.45219	-7.67769	8.7745	2.48406	0	5.48406	9.10823	-1.82802	18.2802	0	0	27122
361	GS Caltex	1.02695	30	2	-2.757496934803320E-01	KOGAS(0.232380); S-Oil(1.106342)	0.646729	0	24.6467	0.404205	0	15.4042	1.34735	-11.7719	39.5755	0	0	38235
362	Hanwha	0.186657	30	11	3.043265715868450E-02	Hanwha(1.000000)	-46.3605	0	10.6395	-182.189	0	41.8112	-13.8268	0	3.17317	0	0	35574
363	Hyundai Motor	1.03299	30	8	2.183532373037510E-02	Hanwha(2.181098); S-Oil(0.264752)	1.02275	-3.49239	28.5304	2.96926	0	92.9693	0.428893	0	13.4289	0	0	84771
364	KEPCO	2.02436	30	1	1.204108914344030E-01	KEPCO(1.000000)	7.17049	0	14.1705	77.851	0	153.851	246.87	0	487.87	0	0	54252
365	KIA Motor	0.869826	30	7	-2.522692258806950E-01	Hanwha(0.274171); KOGAS(0.063890); S-Oil(1.206188)	-4.16556	0	27.8344	-3.25434	0	21.7457	-5.07677	0	33.9232	0	0	44730
366	KOGAS	1.7186	30	11	-7.007155717071730E-01	KOGAS(1.000000)	4.31162	0	10.3116	14.3721	0	34.3721	22.2767	0	53.2767	0	0	35411
367	LG Electronics	0.610322	30	7	-1.015625025908710E-01	Hanwha(1.421453); S-Oil(0.238597)	-12.8594	-0.218532	19.9221	-38.9678	0	61.0322	-6.62452	0	10.3755	0	0	57038
368	Lotte Shopping	0.331178	30	5	-4.878225014187460E-02	Hanwha(0.193888); KOGAS(0.281180); S-Oil(0.362539)	-24.7464	0	12.2536	-40.7981	0	20.2019	-49.4928	0	24.5072	0	0	26687
369	POSCO	1.8374	30	2	4.178847014216160E-01	Hanwha(1.655398); KOGAS(0.073843)	8.37399	0	18.374	221.073	-413.321	71.7524	4.18699	0	9.18699	0	0	61504
370	Samsung Electronics	2.153	30	8	7.741288612150720E-02	Hanwha(5.687592); KOGAS(0.186598)	33.437	0	62.437	183.327	-98.1083	244.219	14.989	0	27.989	0	0	208938
371	SK Holdings	1.5057	30	7	-1.043806930626050E-02	Hanwha(2.427271); KOGAS(0.561980)	10.6198	0	31.6198	106.703	-196.9	120.804	12.6426	0	37.6426	0	0	106248
372	S-Oil	2.23464	30	1	-3.055855488629310E-01	S-Oil(1.000000)	11.1118	0	20.1118	3.70393	0	6.70393	13.5811	0	24.5811	0	0	27122
373	GS Caltex	0.630068	31	8	2.964858174899730E-01	KIA Motor(0.854795)	-8.87838	-3.02433	12.0973	-5.54899	0	9.45101	-18.4966	-16.7598	14.7436	0	0	38235
374	Hanwha	0.133845	31	1	-2.462717320684830E-01	Samsung Electronics(0.170261)	-49.3708	-2.55335	5.07582	-194.019	-2.15182	27.8295	-14.7246	0	2.27537	0	0	35574
375	Hyundai Motor	0.674892	31	5	-2.606367256067760E-01	KIA Motor(0.232953); Samsung Electronics(0.355852)	-10.0783	-7.01619	13.9055	-29.2597	0	60.7403	-4.2264	0	8.7736	0	0	84771
376	KEPCO	1.10308	31	5	3.388439071655920E-01	POSCO(0.228271); Samsung Electronics(0.192461)	0.721592	0	7.72159	7.83443	0	83.8344	24.8434	-262.279	3.56402	0	0	54252
377	KIA Motor	0.442259	31	6	-2.440978317413760E-01	KIA Motor(1.000000)	-17.8477	0	14.1523	-13.9435	0	11.0565	-21.7519	0	17.2481	0	0	44730
378	KOGAS	1.1243	31	11	-3.588062745071750E-01	KIA Motor(0.217917); Samsung Electronics(0.122829)	0.745785	0	6.74578	2.48595	0	22.486	3.85322	-29.4531	5.40013	0	0	35411
379	LG Electronics	0.395145	31	11	2.815118545826970E-01	KIA Motor(0.213332); Samsung Electronics(0.227319)	-19.9602	-3.2438	9.79597	-60.4855	0	39.5145	-10.2825	0	6.71746	0	0	57038
456	S-Oil	1.25664	37	9	-2.715098937610060E-01	S-Oil(1.000000)	2.3098	0	11.3098	0.769935	0	3.76993	2.82309	0	13.8231	0	0	27122
457	GS Caltex	0.500615	38	12	-1.091888687310450E-01	GS Caltex(1.000000)	-11.9852	0	12.0148	-7.49077	0	7.50923	-24.9692	0	25.0308	0	0	38235
458	Hanwha	0.133736	38	10	7.567254501414760E-02	Hanwha(1.000000)	-49.377	0	7.62295	-194.043	0	29.9569	-14.7265	0	2.27351	0	0	35574
459	Hyundai Motor	0.689833	38	3	-2.721834579405560E-02	Hanwha(0.562799); LG Electronics(1.135208)	-9.61517	-2.17029	19.2145	-27.915	0	62.085	-4.03217	0	8.96783	0	0	84771
460	KEPCO	1.66076	38	2	5.415731607008240E-01	Hanwha(1.525046)	4.62535	0	11.6254	50.2181	-80.5325	45.6856	159.244	-396.777	3.46721	0	0	54252
461	KIA Motor	0.442654	38	4	2.554590613583920E-01	KIA Motor(1.000000)	-17.8351	0	14.1649	-13.9337	0	11.0663	-21.7365	0	17.2635	0	0	44730
462	KOGAS	1.32652	38	5	-2.002698718753020E-02	Hanwha(0.351737); LG Electronics(0.401457)	1.95915	0	7.95915	6.5305	0	26.5305	10.1223	-37.6037	3.51858	0	0	35411
463	LG Electronics	0.398388	38	10	1.721871111548010E-01	LG Electronics(1.000000)	-19.8532	0	13.1468	-60.1612	0	39.8388	-10.2274	0	6.77259	0	0	57038
464	Lotte Shopping	0.196296	38	2	-4.790619977300240E-01	GS Caltex(0.347239); LG Electronics(0.235112)	-29.737	0	7.26297	-49.0259	0	11.9741	-59.4741	-4.24196	10.284	0	0	26687
465	POSCO	1.31793	38	11	-4.162360179205150E-01	Hanwha(1.728903)	3.17935	0	13.1793	83.9347	-296.142	51.7925	1.58967	-2.65899	3.93068	0	0	61504
466	Samsung Electronics	1.54387	38	3	-2.056170994317160E-01	Hanwha(5.873334)	15.7721	0	44.7721	86.4749	-69.5282	175.947	7.07027	-6.71718	13.3531	0	0	208938
467	SK Holdings	1.08416	38	1	-1.178139860228760E-01	Hanwha(2.986676)	1.76728	0	22.7673	17.757	-139.286	89.4714	2.10391	-20.3137	6.79024	0	0	106248
468	S-Oil	1.77556	38	1	-1.305267915120920E-01	GS Caltex(0.709350)	6.98002	-7.45734	8.52268	2.32667	0	5.32667	8.53114	-1.77556	17.7556	0	0	27122
469	GS Caltex	0.504288	39	8	1.576112607388360E-01	KOGAS(0.173116); S-Oil(1.183718)	-11.8971	0	12.1029	-7.43568	0	7.56432	-24.7856	-5.78064	19.4338	0	0	38235
470	Hanwha	0.137687	39	6	2.053514522696880E-01	Hanwha(1.000000)	-49.1518	0	7.84815	-193.158	0	30.8419	-14.6593	0	2.34068	0	0	35574
471	Hyundai Motor	0.688281	39	3	9.290377723989770E-02	Hanwha(0.545419); LG Electronics(1.146048)	-9.6633	-2.16541	19.1713	-28.0547	0	61.9453	-4.05235	0	8.94765	0	0	84771
472	KEPCO	1.19323	39	8	1.522338130644940E-01	SK Holdings(0.510617)	1.3526	0	8.3526	14.6853	-6.76163	83.9237	46.568	-277.624	9.94357	0	0	54252
473	KIA Motor	0.433778	39	4	1.767302719652500E-01	KIA Motor(1.000000)	-18.1191	0	13.8809	-14.1556	0	10.8444	-22.0827	0	16.9173	0	0	44730
474	KOGAS	1.13284	39	4	-4.840185798775450E-01	KOGAS(1.000000)	0.797017	0	6.79702	2.65672	0	22.6567	4.11792	0	35.1179	0	0	35411
475	LG Electronics	0.393732	39	4	1.281831608525780E-01	LG Electronics(1.000000)	-20.0069	0	12.9931	-60.6268	0	39.3732	-10.3066	0	6.69344	0	0	57038
476	Lotte Shopping	0.188833	39	1	6.699294957314410E-02	KIA Motor(0.324256); KOGAS(0.227967); LG Electronics(0.072066)	-30.0132	0	6.98682	-49.4812	0	11.5188	-60.0264	0	13.9736	0	0	26687
477	POSCO	1.23588	39	2	-1.199455839212950E-02	Hanwha(1.218653); SK Holdings(0.170842)	2.35879	0	12.3588	62.2719	-260.607	65.6647	1.17939	0	6.17939	0	0	61504
478	Samsung Electronics	1.48161	39	3	-2.978574890771190E-01	Hanwha(4.554177); SK Holdings(0.441681)	13.9668	0	42.9668	76.5767	-22.5239	213.053	6.26099	0	19.261	0	0	208938
479	SK Holdings	0.778946	39	12	-4.073947944018790E-01	SK Holdings(1.000000)	-4.64214	0	16.3579	-46.6424	0	164.358	-5.52635	0	19.4736	0	0	106248
480	S-Oil	1.02561	39	10	7.500396493993210E-02	S-Oil(1.000000)	0.230448	0	9.23045	0.076816	0	3.07682	0.281658	0	11.2817	0	0	27122
481	GS Caltex	0.495145	40	9	-5.523344520874850E-01	KOGAS(0.182514); S-Oil(1.171447)	-12.1165	0	11.8835	-7.57282	0	7.42718	-25.2427	-5.67583	19.0814	0	0	38235
482	Hanwha	0.176947	40	8	-1.142170934391550E-01	POSCO(0.015047); Samsung Electronics(0.165832)	-46.914	-3.39179	6.69419	-184.364	0	39.6361	-13.9919	0	3.0081	0	0	35574
483	Hyundai Motor	0.854155	40	11	4.904170084024290E-03	Samsung Electronics(0.348565); S-Oil(0.440325)	-4.52119	-8.67042	17.8084	-13.126	0	76.874	-1.89598	0	11.104	0	0	84771
484	KEPCO	1.09496	40	9	3.297523795672220E-01	KEPCO(1.000000)	0.664688	0	7.66469	7.21662	0	83.2166	22.8843	0	263.884	0	0	54252
485	KIA Motor	0.439237	40	5	8.976836217496980E-02	KOGAS(0.032255); Samsung Electronics(0.027925); S-Oil(1.391975)	-17.9444	0	14.0556	-14.0191	0	10.9809	-21.8698	0	17.1302	0	0	44730
486	KOGAS	1.05502	40	4	1.975799307814550E-01	KOGAS(1.000000)	0.330136	0	6.33014	1.10045	0	21.1005	1.70571	0	32.7057	0	0	35411
487	LG Electronics	0.492051	40	3	4.165640286502690E-01	Samsung Electronics(0.221489); S-Oil(0.396746)	-16.7623	-3.85066	12.387	-50.7949	0	49.2051	-8.63513	0	8.36487	0	0	57038
488	Lotte Shopping	0.187877	40	3	5.933303061455940E-02	KOGAS(0.243715); Samsung Electronics(0.022186); S-Oil(0.494853)	-30.0486	0	6.95144	-49.5395	0	11.4605	-60.0971	0	13.9029	0	0	26687
489	POSCO	0.932028	40	10	-3.395587938939520E-01	POSCO(1.000000)	-0.679725	0	9.32028	-17.9447	0	246.055	-0.339862	0	4.66014	0	0	61504
490	Samsung Electronics	1.36282	40	11	2.058157902049480E-01	Samsung Electronics(1.000000)	10.5217	0	39.5217	57.6878	0	216.688	4.71661	0	17.7166	0	0	208938
491	SK Holdings	0.896827	40	1	-1.858096697211980E-01	KOGAS(0.460360); POSCO(0.473113); Samsung Electronics(0.291225)	-2.16664	0	18.8334	-21.7695	0	189.23	-2.57933	0	22.4207	0	0	106248
492	S-Oil	1.01756	40	12	4.292605352110080E-02	S-Oil(1.000000)	0.158027	0	9.15803	0.052676	0	3.05268	0.193144	0	11.1931	0	0	27122
493	GS Caltex	0.61519	41	2	2.278150937766480E-01	KIA Motor(0.854795)	-9.23545	-2.95291	11.8116	-5.77215	0	9.22785	-19.2405	-16.364	14.3954	0	0	38235
494	Hanwha	0.13426	41	7	1.246407985506940E-01	Samsung Electronics(0.170261)	-49.3472	-2.56127	5.09156	-193.926	-2.15849	27.9158	-14.7176	0	2.28242	0	0	35574
495	Hyundai Motor	0.674716	41	2	-5.249740116384700E-01	KIA Motor(0.238525); Samsung Electronics(0.354659)	-10.0838	-7.01436	13.9018	-29.2756	0	60.7244	-4.22869	0	8.77131	0	0	84771
496	KEPCO	1.10927	41	1	1.320721372069170E-01	Samsung Electronics(0.259656)	0.764862	0	7.76486	8.30422	-41.7314	42.5729	26.3331	-263.852	3.4808	0	0	54252
497	KIA Motor	0.431815	41	4	-1.374001145538390E-01	KIA Motor(1.000000)	-18.1819	0	13.8181	-14.2046	0	10.7954	-22.1592	0	16.8408	0	0	44730
498	KOGAS	1.10912	41	3	-4.775579276191770E-01	Lotte Shopping(0.561361); Samsung Electronics(0.097780)	0.654749	0	6.65475	2.1825	0	22.1825	3.38287	-25.6107	8.77217	0	0	35411
499	LG Electronics	0.394564	41	2	8.052011124367740E-02	KIA Motor(0.218170); Samsung Electronics(0.226284)	-19.9794	-3.23904	9.78158	-60.5436	0	39.4564	-10.2924	0	6.70759	0	0	57038
500	Lotte Shopping	0.179616	41	10	-1.217547380406360E-01	Lotte Shopping(1.000000)	-30.3542	0	6.6458	-50.0434	0	10.9566	-60.7084	0	13.2916	0	0	26687
501	POSCO	0.880281	41	5	3.788287603532090E-01	Samsung Electronics(0.294365)	-1.19719	0	8.80281	-31.6058	-184.131	48.2637	-0.598595	-0.455318	3.94609	0	0	61504
502	Samsung Electronics	1.03119	41	4	-7.823639604794310E-02	Samsung Electronics(1.000000)	0.904424	0	29.9044	4.95874	0	163.959	0.405432	0	13.4054	0	0	208938
503	SK Holdings	0.724135	41	5	2.363691415933060E-01	Samsung Electronics(0.508514)	-5.79317	0	15.2068	-58.2075	-69.4171	83.3754	-6.89663	-11.2865	6.81686	0	0	106248
504	S-Oil	2.18192	41	5	-3.362022547087680E-01	KIA Motor(0.606349)	10.6373	-11.2587	8.37859	3.54577	0	6.54577	13.0012	-13.7898	10.2114	0	0	27122
505	GS Caltex	0.526763	42	5	-2.897703267582480E-01	KOGAS(0.196368); S-Oil(1.153359)	-11.3577	0	12.6423	-7.09856	0	7.90144	-23.6619	-6.03826	20.2999	0	0	38235
506	Hanwha	0.140821	42	11	-6.359821048821390E-02	Samsung Electronics(0.170261)	-48.9732	-2.68643	5.34037	-192.456	-2.26397	29.2799	-14.606	0	2.39396	0	0	35574
507	Hyundai Motor	0.670217	42	12	-1.168354030989840E-01	Hyundai Motor(1.000000)	-10.2233	0	20.7767	-29.6805	0	60.3195	-4.28719	0	8.71282	0	0	84771
508	KEPCO	1.11292	42	9	-3.283933400858170E-01	SK Holdings(0.510617)	0.790462	0	7.79046	8.58216	-6.30656	78.2756	27.2145	-258.94	9.27436	0	0	54252
509	KIA Motor	0.445647	42	6	-3.076029677003820E-01	KIA Motor(1.000000)	-17.7393	0	14.2607	-13.8588	0	11.1412	-21.6198	0	17.3802	0	0	44730
510	KOGAS	1.0432	42	10	1.663926399093990E-01	KOGAS(1.000000)	0.259221	0	6.25922	0.864071	0	20.8641	1.33931	0	32.3393	0	0	35411
511	LG Electronics	0.386832	42	10	7.055321672622080E-02	LG Electronics(1.000000)	-20.2346	0	12.7654	-61.3168	0	38.6832	-10.4239	0	6.57614	0	0	57038
586	Samsung Electronics	1.65131	48	5	-4.484643558550580E-01	Hyundai Motor(1.983520); POSCO(0.519225); SK Holdings(0.083377)	18.888	0	47.888	103.558	0	262.558	8.46702	0	21.467	0	0	208938
587	SK Holdings	0.73514	48	10	1.756478352688330E-01	SK Holdings(1.000000)	-5.56206	0	15.4379	-55.8855	0	155.115	-6.6215	0	18.3785	0	0	106248
588	S-Oil	1.04	48	6	-1.407416619959470E-01	S-Oil(1.000000)	0.360001	0	9.36	0.12	0	3.12	0.440001	0	11.44	0	0	27122
589	GS Caltex	0.491829	49	6	2.280432440997400E-02	GS Caltex(1.000000)	-12.1961	0	11.8039	-7.62257	0	7.37743	-25.4086	0	24.5914	0	0	38235
590	Hanwha	0.192809	49	7	2.304157936912420E-01	Samsung Electronics(0.170261)	-46.0099	-3.6782	7.3119	-180.811	-3.09977	40.0894	-13.7223	0	3.27775	0	0	35574
591	Hyundai Motor	0.930234	49	5	-2.093163766642900E-01	KIA Motor(0.304716); Samsung Electronics(0.340489)	-2.16275	-9.67073	19.1665	-6.27895	0	83.7211	-0.906959	0	12.093	0	0	84771
592	KEPCO	1.1587	49	2	-3.575746017354590E-01	SK Holdings(0.510617)	1.11089	0	8.11089	12.0611	-6.56596	81.4952	38.2465	-269.591	9.65583	0	0	54252
593	KIA Motor	0.466023	49	6	-4.528979780110580E-01	KIA Motor(1.000000)	-17.0873	0	14.9127	-13.3494	0	11.6506	-20.8251	0	18.1749	0	0	44730
594	KOGAS	1.395	49	3	2.140854129759750E-01	GS Caltex(0.505277); SK Holdings(0.151455)	2.37001	0	8.37001	7.90003	0	27.9	12.245	-27.9555	15.2895	0	0	35411
595	LG Electronics	0.536286	49	8	1.782647533686320E-01	KIA Motor(0.274767); Samsung Electronics(0.214167)	-15.3025	-4.40246	13.295	-46.3714	0	53.6286	-7.88313	0	9.11687	0	0	57038
596	Lotte Shopping	0.19958	49	2	2.003034188636990E-01	GS Caltex(0.557632); SK Holdings(0.050504)	-29.6155	0	7.38446	-48.8256	0	12.1744	-59.2311	-0.100904	14.668	0	0	26687
597	POSCO	1.23198	49	8	1.507821706715560E-01	Samsung Electronics(0.266879); SK Holdings(0.054051)	2.31976	0	12.3198	61.2417	-253.776	71.4655	1.15988	0	6.15988	0	0	61504
598	Samsung Electronics	1.48087	49	11	-1.384604089289910E-01	Samsung Electronics(1.000000)	13.9452	0	42.9452	76.4583	0	235.458	6.25131	0	19.2513	0	0	208938
599	SK Holdings	0.756405	49	12	2.727566050159460E-01	SK Holdings(1.000000)	-5.11549	0	15.8845	-51.3985	0	159.601	-6.08987	0	18.9101	0	0	106248
600	S-Oil	1.16991	49	9	4.688396300254560E-02	S-Oil(1.000000)	1.52921	0	10.5292	0.509737	0	3.50974	1.86904	0	12.869	0	0	27122
601	GS Caltex	0.573997	50	6	6.526918430861320E-01	GS Caltex(1.000000)	-10.2241	0	13.7759	-6.39005	0	8.60995	-21.3002	0	28.6998	0	0	38235
602	Hanwha	0.263636	50	5	-3.513964057168800E-01	LG Electronics(0.454484); POSCO(0.156919)	-41.9727	-6.28628	8.74098	-164.946	0	59.0545	-12.5182	0	4.48181	0	0	35574
603	Hyundai Motor	0.931006	50	2	-2.705887740559180E-01	LG Electronics(1.421024); POSCO(0.060462)	-2.13882	-5.35118	23.51	-6.20947	0	83.7905	-0.896923	0	12.1031	0	0	84771
604	KEPCO	1.13115	50	7	5.835766393452790E-02	POSCO(0.044139); SK Holdings(0.485066)	0.918041	0	7.91804	9.96731	0	85.9673	31.6069	-263.451	9.15559	0	0	54252
605	KIA Motor	0.674616	50	5	2.588568036446160E-01	GS Caltex(0.320480); Lotte Shopping(1.216939)	-10.4123	-8.61666	12.9711	-8.13459	0	16.8654	-12.69	0	26.31	0	0	44730
606	KOGAS	1.15613	50	9	9.261167394432060E-02	KOGAS(1.000000)	0.9368	0	6.9368	3.12267	0	23.1227	4.84014	0	35.8401	0	0	35411
607	LG Electronics	0.489896	50	3	8.538996571074430E-01	LG Electronics(1.000000)	-16.8334	0	16.1666	-51.0104	0	48.9896	-8.67177	0	8.32823	0	0	57038
608	Lotte Shopping	0.190024	50	9	3.127975009945740E-01	Lotte Shopping(1.000000)	-29.9691	0	7.03088	-49.4085	0	11.5915	-59.9382	0	14.0618	0	0	26687
609	POSCO	0.888063	50	10	1.268798724099900E-01	POSCO(1.000000)	-1.11937	0	8.88063	-29.5514	0	234.449	-0.559686	0	4.44031	0	0	61504
610	Samsung Electronics	2.06152	50	8	5.245867910591930E-02	LG Electronics(2.782523); POSCO(0.816669)	30.7841	-7.5477	52.2364	168.782	0	327.782	13.7998	0	26.7998	0	0	208938
611	SK Holdings	0.738835	50	4	-1.811937263036610E-01	SK Holdings(1.000000)	-5.48446	0	15.5155	-55.1057	0	155.894	-6.52912	0	18.4709	0	0	106248
612	S-Oil	2.03582	50	7	8.137569708156720E-01	GS Caltex(0.709350)	9.32241	-8.55046	9.77195	3.10747	0	6.10747	11.3941	-2.03582	20.3582	0	0	27122
613	GS Caltex	0.639061	51	3	-1.634619965109100E-01	KIA Motor(0.854795)	-8.66254	-3.06749	12.27	-5.41409	0	9.58591	-18.047	-16.999	14.954	0	0	38235
614	Hanwha	0.227267	51	8	7.765998022151840E-02	LG Electronics(0.487264); POSCO(0.126519)	-44.0458	-5.41908	7.53515	-173.092	0	50.9078	-13.1365	0	3.86354	0	0	35574
615	Hyundai Motor	0.756812	51	2	6.068683288916310E-02	LG Electronics(1.436651); POSCO(0.045969)	-7.53881	-4.34996	19.1112	-21.8869	0	68.1131	-3.16144	0	9.83856	0	0	84771
616	KEPCO	1.36597	51	11	2.172684965459060E-01	KEPCO(1.000000)	2.56177	0	9.56177	27.8135	0	103.813	88.1979	0	329.198	0	0	54252
617	KIA Motor	0.448571	51	12	-3.024411477851340E-01	KIA Motor(1.000000)	-17.6457	0	14.3543	-13.7857	0	11.2143	-21.5057	0	17.4943	0	0	44730
618	KOGAS	1.14963	51	9	1.224424084061670E-01	KOGAS(1.000000)	0.897771	0	6.89777	2.99257	0	22.9926	4.63849	0	35.6385	0	0	35411
619	LG Electronics	0.393903	51	4	-1.166048384319580E-01	LG Electronics(1.000000)	-20.0012	0	12.9988	-60.6097	0	39.3903	-10.3036	0	6.69635	0	0	57038
620	Lotte Shopping	0.193162	51	11	-6.950583201989590E-02	KIA Motor(0.320751); KOGAS(0.229786); LG Electronics(0.073685)	-29.853	0	7.14698	-49.2171	0	11.7829	-59.706	0	14.294	0	0	26687
621	POSCO	0.949499	51	10	3.987125746108500E-01	POSCO(1.000000)	-0.505005	0	9.49499	-13.3321	0	250.668	-0.252503	0	4.7475	0	0	61504
622	Samsung Electronics	1.76265	51	7	-1.646301029982200E-03	LG Electronics(2.958909); POSCO(0.653091)	22.1168	-6.45347	44.6634	121.261	0	280.261	9.91445	0	22.9144	0	0	208938
623	SK Holdings	0.988088	51	2	3.960325210929290E-02	KOGAS(0.439665); LG Electronics(0.886683); POSCO(0.652061)	-0.250151	0	20.7498	-2.51342	0	208.487	-0.297799	0	24.7022	0	0	106248
624	S-Oil	2.26659	51	2	-1.300057509184980E-01	KIA Motor(0.606349)	11.3993	-11.6956	8.7037	3.79977	0	6.79977	13.9325	-14.3248	10.6076	0	0	27122
625	GS Caltex	0.523787	52	12	3.040040846393290E-01	GS Caltex(1.000000)	-11.4291	0	12.5709	-7.14319	0	7.85681	-23.8106	0	26.1894	0	0	38235
626	Hanwha	0.155671	52	8	-2.271329608543140E-01	POSCO(0.013532); Samsung Electronics(0.166278)	-48.1267	-2.98397	5.8893	-189.13	0	34.8704	-14.3536	0	2.64642	0	0	35574
627	Hyundai Motor	0.769729	52	8	-5.398493566690090E-01	Samsung Electronics(0.358002); S-Oil(0.367626)	-7.1384	-7.81342	16.0482	-20.7244	0	69.2756	-2.99352	0	10.0065	0	0	84771
628	KEPCO	1.24796	52	8	-1.087964624984020E-02	POSCO(0.246166); Samsung Electronics(0.187193)	1.73572	0	8.73572	18.8449	0	94.8449	59.7583	-296.726	4.03211	0	0	54252
629	KIA Motor	0.459273	52	3	1.769764210229530E-02	Lotte Shopping(0.136994); Samsung Electronics(0.029780); S-Oil(1.285004)	-17.3033	0	14.6967	-13.5182	0	11.4818	-21.0884	0	17.9116	0	0	44730
630	KOGAS	1.11351	52	9	2.537105142272900E-01	KOGAS(1.000000)	0.681069	0	6.68107	2.27023	0	22.2702	3.51886	0	34.5189	0	0	35411
631	LG Electronics	0.447525	52	9	-2.986217805058010E-01	Samsung Electronics(0.229594); S-Oil(0.334311)	-18.2317	-3.50221	11.2661	-55.2475	0	44.7525	-9.39208	0	7.60792	0	0	57038
632	Lotte Shopping	0.189783	52	10	3.693489967611730E-01	Lotte Shopping(1.000000)	-29.978	0	7.02196	-49.4233	0	11.5767	-59.9561	0	14.0439	0	0	26687
633	POSCO	0.91179	52	12	-2.469377225716750E-01	POSCO(1.000000)	-0.882099	0	9.1179	-23.2874	0	240.713	-0.44105	0	4.55895	0	0	61504
634	Samsung Electronics	1.19574	52	9	-6.693251638095440E-02	Samsung Electronics(1.000000)	5.67645	0	34.6765	31.1226	0	190.123	2.54462	0	15.5446	0	0	208938
635	SK Holdings	0.818347	52	1	-2.385526836073530E-01	POSCO(0.411325); Samsung Electronics(0.387435)	-3.81471	0	17.1853	-38.3288	0	172.671	-4.54132	-12.5609	7.89774	0	0	106248
636	S-Oil	1.09832	52	4	-3.606244409469990E-01	S-Oil(1.000000)	0.884865	0	9.88486	0.294955	0	3.29495	1.0815	0	12.0815	0	0	27122
637	GS Caltex	0.498491	53	10	-1.057149706886390E-01	GS Caltex(1.000000)	-12.0362	0	11.9638	-7.52263	0	7.47737	-25.0754	0	24.9246	0	0	38235
638	Hanwha	0.147766	53	7	-2.697058093356990E-01	Samsung Electronics(0.170261)	-48.5773	-2.81892	5.60374	-190.9	-2.37562	30.724	-14.488	0	2.51202	0	0	35574
639	Hyundai Motor	0.737967	53	10	5.017876531235040E-01	Hyundai Motor(1.000000)	-8.12304	0	22.877	-23.583	0	66.417	-3.40644	0	9.59356	0	0	84771
640	KEPCO	1.10525	53	4	4.211089426362810E-01	SK Holdings(0.510617)	0.736739	0	7.73674	7.99888	-6.26307	77.7358	25.3649	-257.154	9.2104	0	0	54252
641	KIA Motor	0.600476	53	3	-3.466527216224900E-01	GS Caltex(0.891198); Hyundai Motor(0.125692)	-12.7848	-5.67767	13.5376	-9.98811	0	15.0119	-15.5814	0	23.4186	0	0	44730
642	KOGAS	1.01343	53	6	3.199601576496590E-02	KOGAS(1.000000)	0.080595	0	6.08059	0.268651	0	20.2687	0.416408	0	31.4164	0	0	35411
643	LG Electronics	0.438886	53	5	-6.026134277230160E-01	Hyundai Motor(0.546218); Lotte Shopping(0.133352); Samsung Electronics(0.034344)	-18.5167	0	14.4833	-56.1114	0	43.8886	-9.53893	0	7.46107	0	0	57038
644	Lotte Shopping	0.17371	53	4	-6.155915895362500E-03	Lotte Shopping(1.000000)	-30.5727	0	6.42726	-50.4037	0	10.5963	-61.1455	0	12.8545	0	0	26687
645	POSCO	0.961821	53	1	3.653236348283610E-01	Samsung Electronics(0.271869); SK Holdings(0.044239)	-0.381786	0	9.61821	-10.0792	-198.127	55.7942	-0.190893	0	4.80911	0	0	61504
646	Samsung Electronics	1.13492	53	9	1.548172401843670E-01	Samsung Electronics(1.000000)	3.91264	0	32.9126	21.452	0	180.452	1.75394	0	14.7539	0	0	208938
647	SK Holdings	0.721512	53	6	9.878636159455250E-02	SK Holdings(1.000000)	-5.84825	0	15.1518	-58.7609	0	152.239	-6.9622	0	18.0378	0	0	106248
648	S-Oil	1.76802	53	5	-2.489786292744050E-01	GS Caltex(0.709350)	6.91221	-7.4257	8.48651	2.30407	0	5.30407	8.44826	-1.76802	17.6802	0	0	27122
649	GS Caltex	0.528036	54	7	1.267076526568270E-01	LG Electronics(0.102180); S-Oil(1.194855)	-11.3271	0	12.6729	-7.07946	0	7.92054	-23.5982	-11.8818	14.52	0	0	38235
650	Hanwha	0.163226	54	9	-2.572612355341540E-01	Hanwha(1.000000)	-47.6961	0	9.3039	-187.437	0	36.5627	-14.2252	0	2.77485	0	0	35574
651	Hyundai Motor	0.732168	54	11	3.036387101627830E-01	Hanwha(0.489416); LG Electronics(1.180976)	-8.3028	-2.30348	20.3937	-24.1049	0	65.8951	-3.48182	0	9.51818	0	0	84771
652	KEPCO	1.02387	54	9	8.091912080368150E-01	KEPCO(1.000000)	0.167095	0	7.16709	1.81417	0	77.8142	5.75283	0	246.753	0	0	54252
653	KIA Motor	0.451296	54	8	2.019589370512400E-01	LG Electronics(0.178818); S-Oil(1.273157)	-17.5585	0	14.4415	-13.7176	0	11.2824	-21.3994	-1.64574	15.9548	0	0	44730
654	KOGAS	1.34717	54	2	-7.376054263320830E-03	KEPCO(0.043665); LG Electronics(0.579300)	2.08301	0	8.08301	6.94336	0	26.9434	10.7622	-26.9851	14.7771	0	0	35411
655	LG Electronics	0.40645	54	12	-2.525014383216030E-01	LG Electronics(1.000000)	-19.5872	0	13.4128	-59.355	0	40.645	-10.0904	0	6.90965	0	0	57038
656	Lotte Shopping	0.203585	54	1	3.003458656612270E-01	LG Electronics(0.273893); S-Oil(0.407960)	-29.4673	0	7.53265	-48.5813	0	12.4187	-58.9347	-8.45628	6.60902	0	0	26687
657	POSCO	1.11153	54	9	-4.117338849707750E-01	POSCO(1.000000)	1.11534	0	11.1153	29.445	0	293.445	0.557671	0	5.55767	0	0	61504
658	Samsung Electronics	1.69821	54	7	-1.997872124852160E-01	Hanwha(1.597494); LG Electronics(2.220931); POSCO(0.413490)	20.248	0	49.248	111.015	0	270.015	9.07669	0	22.0767	0	0	208938
659	SK Holdings	1.07763	54	1	-1.952854935342100E-01	KEPCO(0.063290); LG Electronics(1.158088); POSCO(0.597674)	1.63021	0	22.6302	16.3798	0	227.38	1.94073	0	26.9407	0	0	106248
660	S-Oil	1.05102	54	6	-1.702633862160160E-01	S-Oil(1.000000)	0.459178	0	9.45918	0.153059	0	3.15306	0.561217	0	11.5612	0	0	27122
661	GS Caltex	0.916714	55	8	3.980907588259790E-01	KIA Motor(0.644006); S-Oil(0.347637)	-1.99886	0	22.0011	-1.24929	0	13.7507	-4.16429	-18.9952	26.8405	0	0	38235
662	Hanwha	0.146963	55	12	-4.536530073395240E-01	Hanwha(1.000000)	-48.6231	0	8.37689	-191.08	0	32.9197	-14.5016	0	2.49837	0	0	35574
663	Hyundai Motor	0.754401	55	12	5.617139782864700E-01	Hyundai Motor(1.000000)	-7.61358	0	23.3864	-22.104	0	67.896	-3.19279	0	9.80721	0	0	84771
664	KEPCO	1.11071	55	7	-5.479819248003340E-01	SK Holdings(0.510617)	0.774941	0	7.77494	8.41365	-6.294	78.1196	26.6801	-258.424	9.25588	0	0	54252
665	KIA Motor	0.695176	55	11	-6.511188663324060E-01	KIA Motor(1.000000)	-9.75437	0	22.2456	-7.6206	0	17.3794	-11.8881	0	27.1119	0	0	44730
666	KOGAS	1.45533	55	3	2.716758575293140E-01	KOGAS(1.000000)	2.73199	0	8.73199	9.10662	0	29.1066	14.1153	0	45.1153	0	0	35411
667	LG Electronics	0.466423	55	8	-2.521553751823610E-01	Hanwha(0.209671); Hyundai Motor(0.567858); KOGAS(0.040701)	-17.608	0	15.392	-53.3577	0	46.6423	-9.07081	0	7.92919	0	0	57038
668	Lotte Shopping	0.267748	55	1	-1.645753982239200E-01	Hyundai Motor(0.058173); KIA Motor(0.283666); KOGAS(0.256058)	-27.0933	0	9.90667	-44.6674	0	16.3326	-54.1867	0	19.8133	0	0	26687
669	POSCO	1.26441	55	5	3.254369733611190E-02	Hanwha(1.168089); SK Holdings(0.187772)	2.64407	0	12.6441	69.8035	-266.623	67.1805	1.32204	0	6.32204	0	0	61504
670	Samsung Electronics	1.531	55	8	-3.083952703564850E-01	Hanwha(4.408934); SK Holdings(0.490311)	15.3989	0	44.3989	84.4284	-23.2746	220.154	6.90295	0	19.903	0	0	208938
671	SK Holdings	0.725075	55	4	-9.484452790151220E-02	SK Holdings(1.000000)	-5.77343	0	15.2266	-58.0092	0	152.991	-6.87313	0	18.1269	0	0	106248
672	S-Oil	2.45301	55	5	-9.411263877645280E-02	S-Oil(1.000000)	13.0771	0	22.0771	4.35904	0	7.35904	15.9832	0	26.9832	0	0	27122
673	GS Caltex	0.505618	56	7	-2.181006827630110E-01	Lotte Shopping(0.408155); S-Oil(1.008132)	-11.8652	0	12.1348	-7.41573	0	7.58427	-24.7191	-8.35655	16.9243	0	0	38235
674	Hanwha	0.220941	56	5	-2.837529138959220E-01	Hyundai Motor(0.358950); POSCO(0.083660)	-44.4064	-3.83394	8.75969	-174.509	0	49.4908	-13.244	0	3.75599	0	0	35574
675	Hyundai Motor	0.695195	56	6	2.579047995924890E-01	Hyundai Motor(1.000000)	-9.44896	0	21.551	-27.4325	0	62.5675	-3.96247	0	9.03753	0	0	84771
676	KEPCO	1.10288	56	1	-2.956620586571150E-01	SK Holdings(0.510617)	0.720167	0	7.72017	7.81895	-6.24966	77.5693	24.7943	-256.604	9.19068	0	0	54252
677	KIA Motor	0.44046	56	4	-3.805199691885710E-01	LG Electronics(0.123256); Lotte Shopping(0.217024); S-Oil(1.176463)	-17.9053	0	14.0947	-13.9885	0	11.0115	-21.8221	0	17.1779	0	0	44730
678	KOGAS	1.27043	56	11	1.928150064339410E-01	Lotte Shopping(0.924292); SK Holdings(0.101126)	1.62256	0	7.62256	5.40853	0	25.4085	8.38323	-25.3758	14.0074	0	0	35411
679	LG Electronics	0.403959	56	12	-2.413849379540040E-01	LG Electronics(1.000000)	-19.6694	0	13.3306	-59.6041	0	40.3959	-10.1327	0	6.8673	0	0	57038
680	Lotte Shopping	0.178182	56	4	1.128140382345490E-01	Lotte Shopping(1.000000)	-30.4073	0	6.59273	-50.1309	0	10.8691	-60.8145	0	13.1855	0	0	26687
512	Lotte Shopping	0.184215	42	9	4.001872106593460E-02	KIA Motor(0.343562); KOGAS(0.230302); Samsung Electronics(0.015144)	-30.184	0	6.81596	-49.7629	0	11.2371	-60.3681	0	13.6319	0	0	26687
513	POSCO	0.920385	42	7	-7.319446739189120E-04	Samsung Electronics(0.272986); SK Holdings(0.042041)	-0.796154	0	9.20385	-21.0185	-189.591	53.3905	-0.398077	0	4.60192	0	0	61504
514	Samsung Electronics	1.08158	42	6	-3.171173528781400E-01	Samsung Electronics(1.000000)	2.36577	0	31.3658	12.9709	0	171.971	1.06052	0	14.0605	0	0	208938
515	SK Holdings	0.726522	42	6	1.380836020293440E-01	SK Holdings(1.000000)	-5.74303	0	15.257	-57.7038	0	153.296	-6.83694	0	18.1631	0	0	106248
516	S-Oil	1.09951	42	4	-3.839525575558330E-01	S-Oil(1.000000)	0.895618	0	9.89562	0.298539	0	3.29854	1.09464	0	12.0946	0	0	27122
517	GS Caltex	0.49639	43	11	-5.408134788926720E-01	KOGAS(0.177476); S-Oil(1.178025)	-12.0866	0	11.9134	-7.55415	0	7.44585	-25.1805	-5.6901	19.1294	0	0	38235
518	Hanwha	0.144656	43	11	1.990047903856550E-02	Samsung Electronics(0.170261)	-48.7546	-2.75958	5.48578	-191.597	-2.32562	30.0772	-14.5409	0	2.45914	0	0	35574
519	Hyundai Motor	0.688383	43	6	-2.155469325176130E-01	Hyundai Motor(1.000000)	-9.66011	0	21.3399	-28.0455	0	61.9545	-4.05101	0	8.94899	0	0	84771
520	KEPCO	1.19515	43	11	1.394223376492400E-01	Samsung Electronics(0.259656)	1.36607	0	8.36607	14.8316	-44.9625	45.8692	47.0319	-284.282	3.75031	0	0	54252
521	KIA Motor	0.425174	43	5	-1.138495226550810E-01	Lotte Shopping(0.134817); Samsung Electronics(0.029671); S-Oil(1.287986)	-18.3944	0	13.6056	-14.3706	0	10.6294	-22.4182	0	16.5818	0	0	44730
522	KOGAS	1.0877	43	9	3.594037786546610E-01	KOGAS(1.000000)	0.526188	0	6.52619	1.75396	0	21.754	2.71864	0	33.7186	0	0	35411
523	LG Electronics	0.405112	43	11	4.478029411614630E-01	Hyundai Motor(0.453697); Samsung Electronics(0.067346); S-Oil(0.166156)	-19.6313	0	13.3687	-59.4888	0	40.5112	-10.1131	0	6.8869	0	0	57038
524	Lotte Shopping	0.17853	43	4	1.198054305411090E-01	Lotte Shopping(1.000000)	-30.3944	0	6.6056	-50.1097	0	10.8903	-60.7888	0	13.2112	0	0	26687
525	POSCO	0.948439	43	5	-2.507573614926110E-01	Samsung Electronics(0.294365)	-0.515614	0	9.48439	-13.6122	-198.387	52.0006	-0.257807	-0.490572	4.25162	0	0	61504
526	Samsung Electronics	1.11103	43	4	-4.110214487299870E-01	Samsung Electronics(1.000000)	3.21983	0	32.2198	17.6536	0	176.654	1.44337	0	14.4434	0	0	208938
527	SK Holdings	0.780202	43	8	2.142562724946750E-01	Samsung Electronics(0.508514)	-4.61575	0	16.3843	-46.3773	-74.7918	89.8309	-5.49494	-12.1604	7.34466	0	0	106248
528	S-Oil	1.01442	43	10	3.114862833790840E-02	S-Oil(1.000000)	0.129783	0	9.12978	0.043261	0	3.04326	0.158623	0	11.1586	0	0	27122
529	GS Caltex	0.542385	44	10	-4.546843412218970E-01	GS Caltex(1.000000)	-10.9828	0	13.0172	-6.86422	0	8.13578	-22.8807	0	27.1193	0	0	38235
530	Hanwha	0.143203	44	9	-6.646222238852950E-02	Samsung Electronics(0.170261)	-48.8374	-2.73188	5.43071	-191.922	-2.30227	29.7753	-14.5655	0	2.43446	0	0	35574
531	Hyundai Motor	0.712	44	8	2.057017601014910E-01	KIA Motor(0.256157); Samsung Electronics(0.350884)	-8.92801	-7.40196	14.67	-25.92	0	64.08	-3.74401	0	9.256	0	0	84771
532	KEPCO	1.02069	44	12	-6.411967684963450E-02	KEPCO(1.000000)	0.14481	0	7.14481	1.57222	0	77.5722	4.9856	0	245.986	0	0	54252
533	KIA Motor	0.42431	44	12	9.252316461300040E-02	KIA Motor(1.000000)	-18.4221	0	13.5779	-14.3922	0	10.6078	-22.4519	0	16.5481	0	0	44730
534	KOGAS	1.10068	44	6	3.796677396255330E-01	KOGAS(1.000000)	0.604082	0	6.60408	2.01361	0	22.0136	3.12109	0	34.1211	0	0	35411
535	LG Electronics	0.41478	44	1	-1.146069347662560E-01	KIA Motor(0.233405); Samsung Electronics(0.223022)	-19.3122	-3.405	10.2828	-58.522	0	41.478	-9.94873	0	7.05127	0	0	57038
536	Lotte Shopping	0.175292	44	10	-4.691459445142740E-02	Lotte Shopping(1.000000)	-30.5142	0	6.48582	-50.3072	0	10.6928	-61.0284	0	12.9716	0	0	26687
537	POSCO	0.910548	44	12	-2.516622299760950E-01	POSCO(1.000000)	-0.894522	0	9.10548	-23.6154	0	240.385	-0.447261	0	4.55274	0	0	61504
538	Samsung Electronics	1.09988	44	10	3.767201837064270E-01	Samsung Electronics(1.000000)	2.89638	0	31.8964	15.8802	0	174.88	1.29838	0	14.2984	0	0	208938
539	SK Holdings	0.764683	44	5	-7.262978917193500E-01	KEPCO(0.048364); POSCO(0.375126); Samsung Electronics(0.385533)	-4.94165	0	16.0583	-49.6518	0	161.348	-5.88292	0	19.1171	0	0	106248
540	S-Oil	1.92371	44	7	-1.343873904704040E-01	GS Caltex(0.709350)	8.31335	-8.07956	9.23379	2.77112	0	5.77112	10.1608	-1.9237	19.2371	0	0	27122
541	GS Caltex	0.493344	45	12	-4.562189222666330E-02	GS Caltex(1.000000)	-12.1597	0	11.8403	-7.59984	0	7.40016	-25.3328	0	24.6672	0	0	38235
542	Hanwha	0.321931	45	7	9.492161416356310E-02	POSCO(0.019260); Samsung Electronics(0.164591)	-38.6499	-6.17089	12.1792	-151.887	0	72.1125	-11.5272	0	5.47283	0	0	35574
543	Hyundai Motor	1.48971	45	5	5.451431472378810E-02	Samsung Electronics(0.331641); S-Oil(0.570701)	15.181	-15.1219	31.0591	44.0738	0	134.074	6.36622	0	19.3662	0	0	84771
544	KEPCO	1.35661	45	3	4.227420428199250E-01	KOGAS(1.532066)	2.49624	0	9.49624	27.102	-71.4479	31.6541	85.942	-277.878	49.0639	0	0	54252
545	KIA Motor	0.597552	45	3	7.029720556470620E-02	Lotte Shopping(0.167977); Samsung Electronics(0.018546); S-Oil(1.341061)	-12.8783	0	19.1217	-10.0612	0	14.9388	-15.6955	0	23.3045	0	0	44730
546	KOGAS	1.03305	45	6	9.981062494146530E-02	KOGAS(1.000000)	0.198322	0	6.19832	0.661074	0	20.6611	1.02466	0	32.0247	0	0	35411
547	LG Electronics	0.844271	45	2	3.308411425578820E-01	Samsung Electronics(0.207321); S-Oil(0.505888)	-5.13904	-6.60704	21.2539	-15.5729	0	84.4271	-2.64739	0	14.3526	0	0	57038
548	Lotte Shopping	0.201378	45	9	4.329603817481990E-02	Lotte Shopping(1.000000)	-29.549	0	7.45099	-48.7159	0	12.2841	-59.098	0	14.902	0	0	26687
549	POSCO	1.32476	45	11	-3.476472422846500E-01	POSCO(1.000000)	3.24757	0	13.2476	85.736	0	349.736	1.62379	0	6.62379	0	0	61504
550	Samsung Electronics	2.49814	45	5	-1.970090891136630E-01	Samsung Electronics(1.000000)	43.4462	0	72.4462	238.205	0	397.205	19.4759	0	32.4759	0	0	208938
551	SK Holdings	1.08675	45	11	-3.426233824244340E-01	SK Holdings(1.000000)	1.82185	0	22.8218	18.3052	0	229.305	2.16887	0	27.1689	0	0	106248
552	S-Oil	1.36927	45	11	1.959899165812560E-01	S-Oil(1.000000)	3.32344	0	12.3234	1.10781	0	4.10781	4.06198	0	15.062	0	0	27122
553	GS Caltex	0.606382	46	2	-1.932981086135040E-01	KIA Motor(0.854795)	-9.44684	-2.91063	11.6425	-5.90427	0	9.09573	-19.6809	-16.1298	14.1893	0	0	38235
554	Hanwha	0.132838	46	6	-2.280330885737620E-01	Samsung Electronics(0.170261)	-49.4282	-2.53414	5.03761	-194.244	-2.13562	27.62	-14.7418	0	2.25824	0	0	35574
555	Hyundai Motor	0.66725	46	1	1.217678166047590E-01	KIA Motor(0.239312); Samsung Electronics(0.354491)	-10.3152	-6.93675	13.748	-29.9475	0	60.0525	-4.32574	0	8.67426	0	0	84771
556	KEPCO	1.09751	46	5	-8.452768204550770E-03	Samsung Electronics(0.259656)	0.682596	0	7.6826	7.41104	-41.2892	42.1218	23.5008	-261.057	3.44392	0	0	54252
557	KIA Motor	0.425633	46	6	-9.282575730862340E-02	KIA Motor(1.000000)	-18.3797	0	13.6203	-14.3592	0	10.6408	-22.4003	0	16.5997	0	0	44730
558	KOGAS	1.10632	46	11	-5.162923389996460E-01	KIA Motor(0.222809); Samsung Electronics(0.121781)	0.637933	0	6.63793	2.12644	0	22.1264	3.29599	-28.9822	5.31379	0	0	35411
559	LG Electronics	0.390132	46	9	-4.637819851822490E-01	KIA Motor(0.218853); Samsung Electronics(0.226137)	-20.1257	-3.20265	9.67169	-60.9868	0	39.0132	-10.3678	0	6.63224	0	0	57038
560	Lotte Shopping	0.181177	46	10	5.019367941295370E-01	KIA Motor(0.401372); Samsung Electronics(0.041800)	-30.2964	0	6.70355	-49.9482	0	11.0518	-60.5929	-6.19005	7.21706	0	0	26687
561	POSCO	0.870955	46	10	5.737874384150190E-02	Samsung Electronics(0.294365)	-1.29045	0	8.70955	-34.0679	-182.18	47.7523	-0.645226	-0.450494	3.90428	0	0	61504
562	Samsung Electronics	1.02026	46	12	4.920885918350220E-02	Samsung Electronics(1.000000)	0.587597	0	29.5876	3.22165	0	162.222	0.263405	0	13.2634	0	0	208938
563	SK Holdings	0.716463	46	8	-5.873656264612450E-01	Samsung Electronics(0.508514)	-5.95428	0	15.0457	-59.8263	-68.6816	82.4921	-7.08843	-11.1669	6.74463	0	0	106248
564	S-Oil	2.15068	46	8	2.635290144652540E-01	KIA Motor(0.606349)	10.3562	-11.0975	8.25863	3.45205	0	6.45205	12.6575	-13.5923	10.0652	0	0	27122
565	GS Caltex	0.549158	47	8	-3.520876460137460E-01	Samsung Electronics(0.023749); S-Oil(1.226784)	-10.8202	0	13.1798	-6.76263	0	8.23737	-22.5421	-11.927	15.5309	0	0	38235
566	Hanwha	0.141122	47	3	-4.317523581515330E-02	Samsung Electronics(0.170261)	-48.956	-2.69217	5.35178	-192.389	-2.26881	29.3425	-14.6009	0	2.39907	0	0	35574
567	Hyundai Motor	0.67146	47	6	9.535618010576800E-02	Hyundai Motor(1.000000)	-10.1847	0	20.8153	-29.5686	0	60.4314	-4.27102	0	8.72898	0	0	84771
568	KEPCO	1.16596	47	2	2.998776092697410E-01	Samsung Electronics(0.259656)	1.16171	0	8.16171	12.6128	-43.8642	44.7487	39.996	-277.337	3.6587	0	0	54252
569	KIA Motor	0.462618	47	3	-4.822586973313490E-01	Samsung Electronics(0.040966); S-Oil(1.333624)	-17.1962	0	14.8038	-13.4346	0	11.5654	-20.9579	-0.9452	17.0969	0	0	44730
570	KOGAS	1.18283	47	3	1.696482501281700E-01	Samsung Electronics(0.131539); S-Oil(0.292294)	1.09698	0	7.09698	3.65659	0	23.6566	5.66772	-31.1936	5.47411	0	0	35411
571	LG Electronics	0.398993	47	8	3.603274601132650E-01	Hyundai Motor(0.458106); Samsung Electronics(0.067990); S-Oil(0.147417)	-19.8332	0	13.1668	-60.1007	0	39.8993	-10.2171	0	6.78287	0	0	57038
572	Lotte Shopping	0.195443	47	9	-8.539953145893100E-02	Samsung Electronics(0.058764); S-Oil(0.531265)	-29.7686	0	7.23141	-49.0779	0	11.9221	-59.5372	-7.054	7.40882	0	0	26687
573	POSCO	0.925271	47	11	5.483808857726930E-02	Samsung Electronics(0.294365)	-0.747295	0	9.25271	-19.7286	-193.541	50.7303	-0.373647	-0.478588	4.14776	0	0	61504
574	Samsung Electronics	1.08389	47	10	-2.964147365138040E-01	Samsung Electronics(1.000000)	2.43278	0	31.4328	13.3383	0	172.338	1.09056	0	14.0906	0	0	208938
575	SK Holdings	0.761144	47	2	-1.760102494142430E-01	Samsung Electronics(0.508514)	-5.01598	0	15.984	-50.3986	-72.9648	87.6365	-5.9714	-11.8633	7.16525	0	0	106248
576	S-Oil	1.12609	47	6	4.496569409870410E-01	S-Oil(1.000000)	1.13485	0	10.1349	0.378284	0	3.37828	1.38704	0	12.387	0	0	27122
577	GS Caltex	0.491943	48	10	4.552948417472990E-02	GS Caltex(1.000000)	-12.1934	0	11.8066	-7.62085	0	7.37915	-25.4028	0	24.5972	0	0	38235
578	Hanwha	0.183037	48	9	-7.232694090465880E-01	Hanwha(1.000000)	-46.5669	0	10.4331	-183	0	41.0004	-13.8884	0	3.11164	0	0	35574
579	Hyundai Motor	0.678737	48	12	-1.582174685712220E-01	Hyundai Motor(1.000000)	-9.95917	0	21.0408	-28.9137	0	61.0863	-4.17642	0	8.82358	0	0	84771
580	KEPCO	1.12612	48	5	-5.342927894228790E-02	SK Holdings(0.510617)	0.882868	0	7.88287	9.58543	-6.38137	79.2041	30.3959	-262.012	9.38437	0	0	54252
581	KIA Motor	0.447264	48	7	-3.433757738966000E-01	GS Caltex(0.173724); Hyundai Motor(0.107495); S-Oil(1.068329)	-17.6876	0	14.3124	-13.8184	0	11.1816	-21.5567	0	17.4433	0	0	44730
582	KOGAS	1.37707	48	3	-2.577581116433870E-01	GS Caltex(0.498667); SK Holdings(0.153833)	2.26245	0	8.26245	7.5415	0	27.5415	11.6893	-27.5963	15.093	0	0	35411
583	LG Electronics	0.423139	48	8	3.022272142690510E-01	GS Caltex(0.050828); Hyundai Motor(0.614222); SK Holdings(0.028484)	-19.0364	0	13.9636	-57.6861	0	42.3139	-9.80664	0	7.19336	0	0	57038
584	Lotte Shopping	0.198463	48	6	-7.194599053852880E-01	GS Caltex(0.554381); SK Holdings(0.051674)	-29.6569	0	7.34312	-48.8938	0	12.1062	-59.3138	-0.100339	14.5859	0	0	26687
585	POSCO	0.937144	48	4	-3.655531763129790E-01	POSCO(1.000000)	-0.628564	0	9.37144	-16.5941	0	247.406	-0.314282	0	4.68572	0	0	61504
756	S-Oil	1.01877	62	6	6.040709071134510E-02	S-Oil(1.000000)	0.168924	0	9.16892	0.056308	0	3.05631	0.206463	0	11.2065	0	0	27122
757	GS Caltex	0.709961	63	3	2.000294770146600E-01	GS Caltex(1.000000)	-6.96094	0	17.0391	-4.35059	0	10.6494	-14.502	0	35.498	0	0	38235
758	Hanwha	0.134047	63	6	-9.542562111743420E-02	Hanwha(1.000000)	-49.3593	0	7.64066	-193.974	0	30.0265	-14.7212	0	2.27879	0	0	35574
759	Hyundai Motor	0.66706	63	6	-8.187709047368980E-02	Hyundai Motor(1.000000)	-10.3211	0	20.6789	-29.9646	0	60.0354	-4.32822	0	8.67178	0	0	84771
760	KEPCO	1.12642	63	10	-4.656192956904230E-01	KEPCO(1.000000)	0.884956	0	7.88496	9.60809	0	85.6081	30.4678	0	271.468	0	0	54252
761	KIA Motor	0.722013	63	2	-1.365190171556550E-01	Lotte Shopping(1.297267); S-Oil(0.372754)	-8.89558	-6.04786	17.0566	-6.94967	0	18.0503	-10.8415	0	28.1585	0	0	44730
762	KOGAS	1.29563	63	3	-3.782269841849450E-01	KEPCO(0.038171); LG Electronics(0.584525)	1.77378	0	7.77378	5.91261	0	25.9126	9.16454	-25.9527	14.2118	0	0	35411
763	LG Electronics	0.387406	63	12	-6.237531919929310E-02	LG Electronics(1.000000)	-20.2156	0	12.7844	-61.2594	0	38.7406	-10.4141	0	6.58591	0	0	57038
764	Lotte Shopping	0.195851	63	10	-4.984295577593720E-01	Lotte Shopping(1.000000)	-29.7535	0	7.2465	-49.0531	0	11.9469	-59.507	0	14.493	0	0	26687
765	POSCO	0.928317	63	4	-3.251193712645920E-01	POSCO(1.000000)	-0.716832	0	9.28317	-18.9244	0	245.076	-0.358416	0	4.64158	0	0	61504
766	Samsung Electronics	1.50148	63	8	3.918297966870430E-01	Hanwha(5.289229); KEPCO(0.022059); POSCO(0.318389)	14.5428	0	43.5428	79.7347	0	238.735	6.51919	0	19.5192	0	0	208938
767	SK Holdings	0.967046	63	3	-3.569035685574580E-01	Hanwha(1.889054); KEPCO(0.063299); POSCO(0.579030)	-0.692031	0	20.308	-6.95326	0	204.047	-0.823846	0	24.1762	0	0	106248
768	S-Oil	2.28209	63	5	1.849089109427220E-01	S-Oil(1.000000)	11.5388	0	20.5388	3.84626	0	6.84626	14.1029	0	25.1029	0	0	27122
769	GS Caltex	0.617929	64	7	3.262225989990210E-01	KIA Motor(0.854795)	-9.1697	-2.96606	11.8642	-5.73106	0	9.26894	-19.1035	-16.4369	14.4595	0	0	38235
770	Hanwha	0.13817	64	3	1.021147658824180E-01	Samsung Electronics(0.170261)	-49.1243	-2.63585	5.23982	-193.05	-2.22134	28.7287	-14.6511	0	2.34888	0	0	35574
771	Hyundai Motor	0.692224	64	2	1.781287139148080E-01	KIA Motor(0.243629); Samsung Electronics(0.353566)	-9.54107	-7.19637	14.2626	-27.6999	0	62.3001	-4.00109	0	8.99891	0	0	84771
772	KEPCO	1.14157	64	5	2.957167471895550E-01	Samsung Electronics(0.259656)	0.990966	0	7.99097	10.7591	-42.9465	43.8125	34.1176	-271.535	3.58216	0	0	54252
773	KIA Motor	0.433738	64	4	-1.748808914823290E-01	KIA Motor(1.000000)	-18.1204	0	13.8796	-14.1565	0	10.8435	-22.0842	0	16.9158	0	0	44730
774	KOGAS	1.14047	64	11	-5.031353464421960E-01	Lotte Shopping(0.561999); Samsung Electronics(0.097699)	0.842821	0	6.84282	2.8094	0	22.8094	4.35457	-26.3345	9.02008	0	0	35411
775	LG Electronics	0.404354	64	11	2.974796026205190E-01	KIA Motor(0.222592); Samsung Electronics(0.225337)	-19.6563	-3.31941	10.0243	-59.5646	0	40.4354	-10.126	0	6.87403	0	0	57038
776	Lotte Shopping	0.184483	64	6	-2.526669248340370E-01	Lotte Shopping(1.000000)	-30.1741	0	6.82587	-49.7465	0	11.2535	-60.3483	0	13.6517	0	0	26687
777	POSCO	0.905914	64	4	-5.833698331202100E-01	Samsung Electronics(0.294365)	-0.940861	0	9.05914	-24.8387	-189.492	49.6691	-0.470431	-0.468576	4.06099	0	0	61504
778	Samsung Electronics	1.06121	64	6	-2.185288988340770E-01	Samsung Electronics(1.000000)	1.77521	0	30.7752	9.73303	0	168.733	0.795782	0	13.7958	0	0	208938
779	SK Holdings	0.745221	64	10	-4.628762921593010E-01	Samsung Electronics(0.508514)	-5.35036	0	15.6496	-53.7584	-71.4384	85.8032	-6.36948	-11.6152	7.01535	0	0	106248
780	S-Oil	2.19164	64	2	-1.698880455762530E-01	KIA Motor(0.606349)	10.7248	-11.3089	8.4159	3.57492	0	6.57492	13.108	-13.8512	10.2569	0	0	27122
781	GS Caltex	0.524808	65	12	3.183398161959580E-01	GS Caltex(1.000000)	-11.4046	0	12.5954	-7.12788	0	7.87212	-23.7596	0	26.2404	0	0	38235
782	Hanwha	0.131867	65	3	-4.249145960354620E-01	Samsung Electronics(0.170261)	-49.4836	-2.51562	5.00081	-194.462	-2.12002	27.4182	-14.7583	0	2.24174	0	0	35574
783	Hyundai Motor	0.664707	65	9	-9.714694208794130E-04	Samsung Electronics(0.364996); S-Oil(0.313749)	-10.3941	-6.74736	13.8586	-30.1763	0	59.8237	-4.35881	0	8.64119	0	0	84771
784	KEPCO	1.08949	65	11	5.843002161784700E-02	Samsung Electronics(0.259656)	0.626463	0	7.62646	6.8016	-40.9875	41.8141	21.5682	-259.149	3.41876	0	0	54252
785	KIA Motor	0.450933	65	3	-2.709431012755940E-01	GS Caltex(0.080831); Samsung Electronics(0.040771); S-Oil(1.221180)	-17.5701	0	14.4299	-13.7267	0	11.2733	-21.4136	0	17.5864	0	0	44730
786	KOGAS	1.11162	65	2	2.792319883680800E-01	GS Caltex(0.234304); Samsung Electronics(0.126604)	0.669693	0	6.66969	2.23231	0	22.2323	3.46008	-26.6449	7.81517	0	0	35411
787	LG Electronics	0.389137	65	6	-3.699763309488490E-01	Samsung Electronics(0.235697); S-Oil(0.287289)	-20.1585	-3.04528	9.79623	-61.0863	0	38.9137	-10.3847	0	6.61533	0	0	57038
788	Lotte Shopping	0.18518	65	1	-3.660810836690560E-01	GS Caltex(0.429351); Samsung Electronics(0.049157)	-30.1483	0	6.85165	-49.704	0	11.296	-60.2967	-1.78974	11.9136	0	0	26687
789	POSCO	0.864591	65	5	2.188144811356910E-01	Samsung Electronics(0.294365)	-1.35409	0	8.64591	-35.7479	-180.849	47.4034	-0.677044	-0.447202	3.87575	0	0	61504
790	Samsung Electronics	1.01281	65	10	-2.633542430594300E-02	Samsung Electronics(1.000000)	0.371415	0	29.3714	2.03638	0	161.036	0.166497	0	13.1665	0	0	208938
791	SK Holdings	0.711228	65	4	-8.319506435949590E-02	Samsung Electronics(0.508514)	-6.06421	0	14.9358	-60.9309	-68.1798	81.8893	-7.2193	-11.0853	6.69535	0	0	106248
792	S-Oil	1.11133	65	12	-4.142632864522180E-01	S-Oil(1.000000)	1.00201	0	10.002	0.334004	0	3.334	1.22468	0	12.2247	0	0	27122
793	GS Caltex	0.837614	66	7	4.120810355398180E-01	KIA Motor(0.649895); S-Oil(0.337925)	-3.89726	0	20.1027	-2.43579	0	12.5642	-8.11929	-17.3561	24.5246	0	0	38235
794	Hanwha	0.133713	66	6	-5.499006259523430E-02	Hanwha(1.000000)	-49.3783	0	7.62165	-194.048	0	29.9518	-14.7269	0	2.27312	0	0	35574
795	Hyundai Motor	0.736386	66	9	2.033159826278200E-01	Hyundai Motor(1.000000)	-8.17203	0	22.828	-23.7253	0	66.2747	-3.42698	0	9.57302	0	0	84771
796	KEPCO	1.66048	66	8	-2.436042380324770E-01	Hanwha(1.525046)	4.62337	0	11.6234	50.1966	-80.5188	45.6778	159.176	-396.709	3.46662	0	0	54252
797	KIA Motor	0.629436	66	11	-2.451884806364270E-01	KIA Motor(1.000000)	-11.858	0	20.142	-9.26409	0	15.7359	-14.452	0	24.548	0	0	44730
798	KOGAS	1.40388	66	1	4.259709049881790E-01	Hanwha(0.895801); KIA Motor(0.079226)	2.42325	0	8.42325	8.0775	0	28.0775	12.5201	-39.539	3.98111	0	0	35411
799	LG Electronics	0.439997	66	7	-6.304421681035870E-01	Hanwha(1.030379); Hyundai Motor(0.163700); KIA Motor(0.145457)	-18.4801	0	14.5199	-56.0003	0	43.9997	-9.52004	0	7.47996	0	0	57038
800	Lotte Shopping	0.249161	66	2	-1.580730649999670E-01	Hanwha(0.333225); KIA Motor(0.331608)	-27.781	0	9.21897	-45.8012	0	15.1988	-55.5621	-9.54015	8.89779	0	0	26687
801	POSCO	1.31771	66	7	6.357083979427990E-01	Hanwha(1.728903)	3.1771	0	13.1771	83.8754	-296.092	51.7837	1.58855	-2.65854	3.93001	0	0	61504
802	Samsung Electronics	1.5436	66	1	-4.259372566339470E-02	Hanwha(5.873334)	15.7645	0	44.7645	86.433	-69.5163	175.917	7.06685	-6.71603	13.3508	0	0	208938
803	SK Holdings	1.08397	66	8	-4.840342216840370E-01	Hanwha(2.986676)	1.7634	0	22.7634	17.718	-139.262	89.4562	2.09929	-20.3102	6.78909	0	0	106248
804	S-Oil	2.30576	66	5	2.085346695078010E-01	S-Oil(1.000000)	11.7519	0	20.7519	3.91729	0	6.91729	14.3634	0	25.3634	0	0	27122
805	GS Caltex	0.504979	67	10	1.386640728484160E-01	GS Caltex(1.000000)	-11.8805	0	12.1195	-7.42532	0	7.57468	-24.7511	0	25.2489	0	0	38235
806	Hanwha	0.142497	67	8	-8.211271250835940E-02	Samsung Electronics(0.170261)	-48.8776	-2.71841	5.40394	-192.081	-2.29092	29.6285	-14.5775	0	2.42246	0	0	35574
807	Hyundai Motor	0.714265	67	6	-3.499882516016250E-01	Hyundai Motor(1.000000)	-8.85778	0	22.1422	-25.7161	0	64.2839	-3.71455	0	9.28545	0	0	84771
808	KEPCO	1.1363	67	2	1.126233636625100E+00	SK Holdings(0.510617)	0.954078	0	7.95408	10.3586	-6.43902	79.9195	32.8475	-264.378	9.46914	0	0	54252
809	KIA Motor	0.593847	67	11	-1.435876716478910E-02	KIA Motor(1.000000)	-12.9969	0	19.0031	-10.1538	0	14.8462	-15.84	0	23.16	0	0	44730
810	KOGAS	1.16496	67	8	-3.428216607677880E-02	GS Caltex(0.255191); Samsung Electronics(0.122782)	0.989771	0	6.98977	3.29924	0	23.2992	5.11382	-27.9236	8.19022	0	0	35411
811	LG Electronics	0.425465	67	5	-2.938564028681580E-02	GS Caltex(0.064710); Hyundai Motor(0.536160); Samsung Electronics(0.043616)	-18.9596	0	14.0404	-57.4535	0	42.5465	-9.76709	0	7.23291	0	0	57038
681	POSCO	1.22393	56	3	3.087981663699410E-01	POSCO(1.000000)	2.2393	0	12.2393	59.1176	0	323.118	1.11965	0	6.11965	0	0	61504
682	Samsung Electronics	1.74552	56	8	7.906390155717640E-01	Hyundai Motor(2.047044); POSCO(0.420243); SK Holdings(0.089991)	21.62	0	50.62	118.537	0	277.537	9.69173	0	22.6917	0	0	208938
683	SK Holdings	0.719967	56	10	-8.579909535752540E-02	SK Holdings(1.000000)	-5.8807	0	15.1193	-59.087	0	151.913	-7.00083	0	17.9992	0	0	106248
684	S-Oil	1.04087	56	4	-1.435050815938160E-01	S-Oil(1.000000)	0.367791	0	9.36779	0.122597	0	3.1226	0.449522	0	11.4495	0	0	27122
685	GS Caltex	0.77658	57	3	-1.605057004536790E-01	GS Caltex(1.000000)	-5.36209	0	18.6379	-3.3513	0	11.6487	-11.171	0	38.829	0	0	38235
686	Hanwha	0.13345	57	7	8.374137108966000E-01	Samsung Electronics(0.170261)	-49.3934	-2.54581	5.06082	-194.107	-2.14546	27.7472	-14.7314	0	2.26864	0	0	35574
687	Hyundai Motor	0.698939	57	5	-1.044748236792340E-02	Lotte Shopping(0.321922); Samsung Electronics(0.364605)	-9.33288	-8.71563	12.9515	-27.0955	0	62.9045	-3.91379	0	9.08621	0	0	84771
688	KEPCO	1.10257	57	2	3.241382112803580E-01	Samsung Electronics(0.259656)	0.717984	0	7.71798	7.79525	-41.4794	42.3158	24.7191	-262.259	3.45979	0	0	54252
689	KIA Motor	0.649611	57	11	-3.812372898812140E-01	KIA Motor(1.000000)	-11.2124	0	20.7876	-8.75972	0	16.2403	-13.6652	0	25.3348	0	0	44730
690	KOGAS	1.09968	57	3	-4.333818159236510E-01	Lotte Shopping(0.563271); Samsung Electronics(0.097536)	0.598066	0	6.59807	1.99355	0	21.9936	3.09001	-25.3926	8.69745	0	0	35411
691	LG Electronics	0.415023	57	2	1.106625511355740E-01	Lotte Shopping(0.298985); Samsung Electronics(0.234802)	-19.3042	-4.75315	8.94261	-58.4977	0	41.5023	-9.94461	0	7.05539	0	0	57038
692	Lotte Shopping	0.177482	57	12	-7.001722848004800E-02	Lotte Shopping(1.000000)	-30.4332	0	6.56685	-50.1736	0	10.8264	-60.8663	0	13.1337	0	0	26687
693	POSCO	0.874967	57	2	-4.958490739804400E-01	Samsung Electronics(0.294365)	-1.25033	0	8.74967	-33.0088	-183.019	47.9723	-0.625167	-0.452569	3.92226	0	0	61504
694	Samsung Electronics	1.02496	57	10	-5.154254392330820E-02	Samsung Electronics(1.000000)	0.723882	0	29.7239	3.96887	0	162.969	0.324499	0	13.3245	0	0	208938
695	SK Holdings	0.719763	57	1	-5.480045525204780E-02	Samsung Electronics(0.508514)	-5.88497	0	15.115	-59.13	-68.998	82.872	-7.00592	-11.2184	6.7757	0	0	106248
696	S-Oil	2.5036	57	5	-1.715082725871050E-01	S-Oil(1.000000)	13.5324	0	22.5324	4.51081	0	7.51081	16.5396	0	27.5396	0	0	27122
697	GS Caltex	0.504019	58	8	1.125128378798200E-01	KIA Motor(0.584160); S-Oil(0.446336)	-11.9036	0	12.0964	-7.43972	0	7.56028	-24.7991	-10.4437	14.7572	0	0	38235
698	Hanwha	0.307603	58	5	4.149510069377390E-02	Hanwha(1.000000)	-39.4666	0	17.5334	-155.097	0	68.903	-11.7708	0	5.22925	0	0	35574
699	Hyundai Motor	1.0291	58	2	-7.416827958125930E-02	Hanwha(0.365028); LG Electronics(1.258556)	0.902218	-3.23767	28.6645	2.61934	0	92.6193	0.37835	0	13.3783	0	0	84771
700	KEPCO	1.03803	58	4	-1.236833172147510E-01	KEPCO(1.000000)	0.266196	0	7.2662	2.89013	0	78.8901	9.16474	0	250.165	0	0	54252
701	KIA Motor	0.421372	58	4	4.947848835763260E-02	KIA Motor(1.000000)	-18.5161	0	13.4839	-14.4657	0	10.5343	-22.5665	0	16.4335	0	0	44730
702	KOGAS	1.2551	58	3	2.317853940906210E-01	KEPCO(0.103559); Lotte Shopping(0.945187); SK Holdings(0.042999)	1.53061	0	7.53061	5.10203	0	25.102	7.90814	0	38.9081	0	0	35411
703	LG Electronics	0.536073	58	11	4.591872743020670E-02	LG Electronics(1.000000)	-15.3096	0	17.6904	-46.3927	0	53.6073	-7.88675	0	9.11325	0	0	57038
704	Lotte Shopping	0.174215	58	4	6.982689702610790E-03	Lotte Shopping(1.000000)	-30.554	0	6.44595	-50.3729	0	10.6271	-61.1081	0	12.8919	0	0	26687
705	POSCO	1.28599	58	11	-2.296018917839100E-01	POSCO(1.000000)	2.85992	0	12.8599	75.5019	0	339.502	1.42996	0	6.42996	0	0	61504
706	Samsung Electronics	2.39446	58	8	2.083376577479250E-01	Hanwha(1.195242); LG Electronics(2.374295); POSCO(0.503925)	40.4393	0	69.4393	221.719	0	380.719	18.128	0	31.128	0	0	208938
707	SK Holdings	0.759161	58	10	3.004133433800970E-01	SK Holdings(1.000000)	-5.05762	0	15.9424	-50.817	0	160.183	-6.02097	0	18.979	0	0	106248
708	S-Oil	1.05045	58	12	-1.741740741990340E-01	S-Oil(1.000000)	0.45406	0	9.45406	0.151353	0	3.15135	0.554962	0	11.555	0	0	27122
709	GS Caltex	0.776655	59	3	-2.016770285888820E-01	GS Caltex(1.000000)	-5.36027	0	18.6397	-3.35017	0	11.6498	-11.1672	0	38.8328	0	0	38235
710	Hanwha	0.15172	59	4	5.987091246665520E-01	Hanwha(1.000000)	-48.352	0	8.64805	-190.015	0	33.9853	-14.4208	0	2.57924	0	0	35574
711	Hyundai Motor	0.822601	59	11	9.773066253370530E-02	Hanwha(2.077793); KIA Motor(0.242691)	-5.49936	-3.15461	22.346	-15.9659	0	74.0341	-2.30618	0	10.6938	0	0	84771
712	KEPCO	1.10677	59	9	-1.823939843165580E-01	SK Holdings(0.510617)	0.747421	0	7.74742	8.11486	-6.27172	77.8431	25.7326	-257.51	9.22312	0	0	54252
713	KIA Motor	0.563625	59	3	5.489028870135690E-01	KIA Motor(1.000000)	-13.964	0	18.036	-10.9094	0	14.0906	-17.0186	0	21.9814	0	0	44730
714	KOGAS	1.05475	59	10	-2.001490992260810E-01	KOGAS(1.000000)	0.328505	0	6.3285	1.09502	0	21.095	1.69728	0	32.6973	0	0	35411
715	LG Electronics	0.482692	59	3	-1.782413416118680E-01	Hanwha(1.330236); KIA Motor(0.217219)	-17.0712	-0.507143	15.4217	-51.7308	0	48.2692	-8.79423	0	8.20577	0	0	57038
716	Lotte Shopping	0.216925	59	11	1.218989180117060E-01	Hanwha(0.089836); KIA Motor(0.303829); KOGAS(0.279599)	-28.9738	0	8.02621	-47.7676	0	13.2324	-57.9476	0	16.0524	0	0	26687
717	POSCO	0.926476	59	10	3.188924281950580E-01	POSCO(1.000000)	-0.735238	0	9.26476	-19.4103	0	244.59	-0.367619	0	4.63238	0	0	61504
718	Samsung Electronics	1.55079	59	1	-1.984712660786090E-01	Hanwha(4.225861); POSCO(0.120675); SK Holdings(0.481752)	15.9729	0	44.9729	87.5758	0	246.576	7.16029	0	20.1603	0	0	208938
719	SK Holdings	0.722508	59	6	1.015739986884120E-01	SK Holdings(1.000000)	-5.82733	0	15.1727	-58.5507	0	152.449	-6.93729	0	18.0627	0	0	106248
720	S-Oil	2.7546	59	8	1.171947776447840E-01	GS Caltex(0.709350)	15.7914	-11.5693	13.2221	5.26381	0	8.26381	19.3006	-2.7546	27.546	0	0	27122
721	GS Caltex	0.885669	60	8	-3.467934994840110E-01	KIA Motor(0.854795)	-2.74394	-4.25121	17.0049	-1.71496	0	13.285	-5.71654	-23.5588	20.7247	0	0	38235
722	Hanwha	0.145448	60	11	5.171192020131040E-01	Samsung Electronics(0.170261)	-48.7095	-2.7747	5.51583	-191.42	-2.33835	30.242	-14.5274	0	2.47261	0	0	35574
723	Hyundai Motor	0.754442	60	1	-7.753167540134870E-02	KIA Motor(0.185257); Samsung Electronics(0.366063)	-7.61231	-7.84319	15.5445	-22.1003	0	67.8997	-3.19226	0	9.80774	0	0	84771
724	KEPCO	1.18082	60	2	-4.235735725535410E-01	POSCO(0.238026); Samsung Electronics(0.189589)	1.26577	0	8.26577	13.7427	0	89.7427	43.5787	-280.763	3.8152	0	0	54252
725	KIA Motor	0.621671	60	11	-2.079695042469110E-01	KIA Motor(1.000000)	-12.1065	0	19.8935	-9.45822	0	15.5418	-14.7548	0	24.2452	0	0	44730
726	KOGAS	1.19202	60	8	-3.693886888040600E-01	Lotte Shopping(0.567432); Samsung Electronics(0.097005)	1.1521	0	7.1521	3.84033	0	23.8403	5.95251	-27.5247	9.42777	0	0	35411
727	LG Electronics	0.446344	60	2	2.952034063142370E-01	KIA Motor(0.171429); Samsung Electronics(0.236290)	-18.2706	-3.66411	11.0653	-55.3656	0	44.6344	-9.41215	0	7.58785	0	0	57038
728	Lotte Shopping	0.190975	60	4	3.793288697168850E-01	Lotte Shopping(1.000000)	-29.9339	0	7.06606	-49.3506	0	11.6494	-59.8679	0	14.1321	0	0	26687
729	POSCO	0.892243	60	4	-1.409012655778350E-01	POSCO(1.000000)	-1.07757	0	8.92243	-28.4479	0	235.552	-0.538787	0	4.46121	0	0	61504
730	Samsung Electronics	1.11711	60	4	4.133670631961380E-01	Samsung Electronics(1.000000)	3.39632	0	32.3963	18.6212	0	177.621	1.52249	0	14.5225	0	0	208938
731	SK Holdings	0.772871	60	10	-4.890443520970140E-01	POSCO(0.396978); Samsung Electronics(0.391658)	-4.76971	0	16.2303	-47.9242	0	163.076	-5.67823	-11.8629	7.45885	0	0	106248
732	S-Oil	3.14125	60	2	1.256953565936760E-02	KIA Motor(0.606349)	19.2712	-16.2088	12.0624	6.42374	0	9.42374	23.5537	-19.8527	14.701	0	0	27122
733	GS Caltex	0.504313	61	10	1.493193035012470E-01	GS Caltex(1.000000)	-11.8965	0	12.1035	-7.4353	0	7.5647	-24.7843	0	25.2157	0	0	38235
734	Hanwha	0.137424	61	6	-2.002057542809180E-01	Hanwha(1.000000)	-49.1668	0	7.83318	-193.217	0	30.783	-14.6638	0	2.33621	0	0	35574
735	Hyundai Motor	0.727073	61	9	1.868821350328240E-01	Hanwha(2.027548); KIA Motor(0.282652)	-8.46074	-2.78826	19.751	-24.5634	0	65.4366	-3.54805	0	9.45195	0	0	84771
736	KEPCO	1.20699	61	3	3.044229817779960E-02	SK Holdings(0.510617)	1.44894	0	8.44894	15.7313	-6.83961	84.8917	49.8847	-280.826	10.0583	0	0	54252
737	KIA Motor	0.427741	61	6	-1.200531665849280E-01	KIA Motor(1.000000)	-18.3123	0	13.6877	-14.3065	0	10.6935	-22.3181	0	16.6819	0	0	44730
738	KOGAS	1.01161	61	6	-1.810688834837040E-02	KOGAS(1.000000)	0.069683	0	6.06968	0.232278	0	20.2323	0.360031	0	31.36	0	0	35411
739	LG Electronics	0.423257	61	7	-9.052131705090180E-02	Hanwha(1.287784); KIA Motor(0.250981)	-19.0325	-0.444698	13.5228	-57.6743	0	42.3257	-9.80462	0	7.19538	0	0	57038
740	Lotte Shopping	0.182281	61	5	-4.204943920816670E-01	Hanwha(0.083342); KIA Motor(0.336412); KOGAS(0.244965)	-30.2556	0	6.74441	-49.8808	0	11.1192	-60.5112	0	13.4888	0	0	26687
741	POSCO	1.23838	61	2	5.515370450872450E-02	Hanwha(1.223451); SK Holdings(0.169236)	2.38377	0	12.3838	62.9316	-261.134	65.7975	1.19189	0	6.19189	0	0	61504
742	Samsung Electronics	1.48321	61	3	1.325331325984050E-01	Hanwha(4.567811); SK Holdings(0.437116)	14.0132	0	43.0132	76.8311	-22.5482	213.283	6.28179	0	19.2818	0	0	208938
743	SK Holdings	0.78793	61	6	-4.557401561051720E-01	SK Holdings(1.000000)	-4.45347	0	16.5465	-44.7468	0	166.253	-5.30175	0	19.6983	0	0	106248
744	S-Oil	1.78867	61	1	-8.938130316564400E-02	GS Caltex(0.709350)	7.09805	-7.51243	8.58563	2.36602	0	5.36602	8.6754	-1.78867	17.8867	0	0	27122
745	GS Caltex	0.49218	62	11	-1.887022627497580E-01	KOGAS(0.188947); S-Oil(1.163048)	-12.1877	0	11.8123	-7.6173	0	7.3827	-25.391	-5.64184	18.9672	0	0	38235
746	Hanwha	0.137048	62	4	-2.002043723731850E-01	Hanwha(1.000000)	-49.1883	0	7.81172	-193.301	0	30.6987	-14.6702	0	2.32981	0	0	35574
747	Hyundai Motor	0.688045	62	6	2.240991675480420E-01	Hyundai Motor(1.000000)	-9.6706	0	21.3294	-28.0759	0	61.9241	-4.05541	0	8.94459	0	0	84771
748	KEPCO	1.06231	62	10	-2.387015115332730E-01	KEPCO(1.000000)	0.436173	0	7.43617	4.73559	0	80.7356	15.0168	0	256.017	0	0	54252
749	KIA Motor	0.425235	62	8	8.581920898850680E-02	Lotte Shopping(0.138204); Samsung Electronics(0.029928); S-Oil(1.282673)	-18.3925	0	13.6075	-14.3691	0	10.6309	-22.4158	0	16.5842	0	0	44730
750	KOGAS	1.013	62	10	3.562767499993450E-02	KOGAS(1.000000)	0.077993	0	6.07799	0.259978	0	20.26	0.402966	0	31.403	0	0	35411
751	LG Electronics	0.404264	62	6	3.707385283560200E-01	Hyundai Motor(0.452970); Samsung Electronics(0.067778); S-Oil(0.165100)	-19.6593	0	13.3407	-59.5736	0	40.4264	-10.1275	0	6.87249	0	0	57038
752	Lotte Shopping	0.17418	62	10	-2.352588593645310E-02	Lotte Shopping(1.000000)	-30.5554	0	6.44465	-50.375	0	10.625	-61.1107	0	12.8893	0	0	26687
753	POSCO	0.940259	62	5	-6.953735510403520E-02	KEPCO(0.001925); Samsung Electronics(0.293865)	-0.597407	0	9.40259	-15.7715	-196.599	51.6291	-0.298704	0	4.7013	0	0	61504
754	Samsung Electronics	1.10164	62	10	-3.876395001344370E-01	Samsung Electronics(1.000000)	2.94759	0	31.9476	16.1609	0	175.161	1.32133	0	14.3213	0	0	208938
755	SK Holdings	0.771663	62	1	2.806049163041460E-01	KEPCO(0.047598); Samsung Electronics(0.496155)	-4.79509	0	16.2049	-48.1792	-72.0709	90.7499	-5.70843	0	19.2916	0	0	106248
812	Lotte Shopping	0.186027	67	3	-3.822279302463580E-01	GS Caltex(0.448253); Samsung Electronics(0.045698)	-30.117	0	6.88301	-49.6523	0	11.3477	-60.234	-1.79793	11.9681	0	0	26687
813	POSCO	0.931944	67	2	2.697966586912940E-01	Samsung Electronics(0.273163); SK Holdings(0.041693)	-0.680559	0	9.31944	-17.9668	-191.972	54.061	-0.340279	0	4.65972	0	0	61504
814	Samsung Electronics	1.09445	67	6	-3.334350143601920E-01	Samsung Electronics(1.000000)	2.73915	0	31.7392	15.0181	0	174.018	1.2279	0	14.2279	0	0	208938
815	SK Holdings	0.741781	67	6	1.941655421183850E-01	SK Holdings(1.000000)	-5.4226	0	15.5774	-54.4843	0	156.516	-6.45548	0	18.5445	0	0	106248
816	S-Oil	1.79103	67	1	-2.590279301043670E-01	GS Caltex(0.709350)	7.11929	-7.52234	8.59696	2.3731	0	5.3731	8.70136	-1.79103	17.9103	0	0	27122
817	GS Caltex	0.68695	68	7	1.946174635966750E-01	KOGAS(0.232450); S-Oil(1.106250)	-7.51321	0	16.4868	-4.69576	0	10.3042	-15.6525	-7.87448	26.473	0	0	38235
818	Hanwha	0.135943	68	4	-1.563915462030070E-01	Hanwha(1.000000)	-49.2512	0	7.74875	-193.549	0	30.4512	-14.689	0	2.31103	0	0	35574
819	Hyundai Motor	0.6631	68	6	5.701472107220080E-02	Hyundai Motor(1.000000)	-10.4439	0	20.5561	-30.321	0	59.679	-4.3797	0	8.6203	0	0	84771
820	KEPCO	1.13154	68	4	6.367048848553550E-01	SK Holdings(0.510617)	0.920788	0	7.92079	9.99712	-6.41207	79.5851	31.7014	-263.272	9.42951	0	0	54252
821	KIA Motor	0.579084	68	8	4.887432533568390E-02	KOGAS(0.039037); Samsung Electronics(0.045317); S-Oil(1.249145)	-13.4693	0	18.5307	-10.5229	0	14.4771	-16.4157	0	22.5843	0	0	44730
822	KOGAS	1.14927	68	9	1.025007732991510E-01	KOGAS(1.000000)	0.895602	0	6.8956	2.98534	0	22.9853	4.62728	0	35.6273	0	0	35411
823	LG Electronics	0.404638	68	12	-4.624475649213920E-01	Hyundai Motor(0.470445); Samsung Electronics(0.067501); S-Oil(0.112617)	-19.6469	0	13.3531	-59.5362	0	40.4638	-10.1212	0	6.87885	0	0	57038
824	Lotte Shopping	0.220257	68	1	-2.544594334543100E-01	KOGAS(0.262289); Samsung Electronics(0.032014); S-Oil(0.394885)	-28.8505	0	8.14951	-47.5643	0	13.4357	-57.701	0	16.299	0	0	26687
825	POSCO	0.941711	68	8	-1.700934297212400E-01	Samsung Electronics(0.272851); SK Holdings(0.042307)	-0.582891	0	9.41711	-15.3883	-193.984	54.6276	-0.291446	0	4.70855	0	0	61504
826	Samsung Electronics	1.10719	68	4	-3.981977060658930E-01	Samsung Electronics(1.000000)	3.10848	0	32.1085	17.043	0	176.043	1.39346	0	14.3935	0	0	208938
827	SK Holdings	0.738676	68	6	-1.947484477346710E-01	SK Holdings(1.000000)	-5.4878	0	15.5122	-55.1393	0	155.861	-6.5331	0	18.4669	0	0	106248
828	S-Oil	1.49493	68	11	-2.079597921246870E-01	S-Oil(1.000000)	4.45438	0	13.4544	1.48479	0	4.48479	5.44424	0	16.4442	0	0	27122
829	GS Caltex	0.529688	69	10	-3.489420596081020E-01	GS Caltex(1.000000)	-11.2875	0	12.7125	-7.05469	0	7.94531	-23.5156	0	26.4844	0	0	38235
830	Hanwha	0.183622	69	11	5.415326501954740E-02	Hanwha(1.000000)	-46.5336	0	10.4664	-182.869	0	41.1312	-13.8784	0	3.12157	0	0	35574
831	Hyundai Motor	0.6748	69	12	1.264455188063380E-01	Hyundai Motor(1.000000)	-10.0812	0	20.9188	-29.268	0	60.732	-4.2276	0	8.7724	0	0	84771
832	KEPCO	1.14051	69	8	3.752522120284830E-02	SK Holdings(0.510617)	0.98358	0	7.98358	10.6789	-6.4629	80.216	33.8633	-265.359	9.50426	0	0	54252
833	KIA Motor	0.494809	69	6	6.960642700045230E-01	KIA Motor(1.000000)	-16.1661	0	15.8339	-12.6298	0	12.3702	-19.7025	0	19.2975	0	0	44730
834	KOGAS	1.31929	69	3	-2.832246137483240E-01	LG Electronics(0.580107); SK Holdings(0.021863)	1.91575	0	7.91575	6.38585	0	26.3858	9.89806	-36.5894	4.30866	0	0	35411
835	LG Electronics	0.395639	69	6	1.476745849490510E-01	LG Electronics(1.000000)	-19.9439	0	13.0561	-60.4361	0	39.5639	-10.2741	0	6.72586	0	0	57038
836	Lotte Shopping	0.201085	69	7	-4.023737254628680E-01	GS Caltex(0.336186); LG Electronics(0.242521)	-29.5599	0	7.44015	-48.7338	0	12.2662	-59.1197	-4.34544	10.5349	0	0	26687
837	POSCO	1.41739	69	1	5.594579443559260E-01	Hyundai Motor(0.606704); SK Holdings(0.094807)	4.17385	0	14.1739	110.19	-322.45	51.7402	2.08693	0	7.08693	0	0	61504
838	Samsung Electronics	1.73389	69	7	4.879868118727170E-01	Hyundai Motor(2.313559); SK Holdings(0.120617)	21.2827	0	50.2827	116.688	-116.233	159.455	9.54054	0	22.5405	0	0	208938
839	SK Holdings	0.744532	69	6	-2.219470117843900E-01	SK Holdings(1.000000)	-5.36483	0	15.6352	-53.9037	0	157.096	-6.3867	0	18.6133	0	0	106248
840	S-Oil	1.87867	69	7	-8.261075203233030E-01	GS Caltex(0.709350)	7.90803	-7.89041	9.01761	2.63601	0	5.63601	9.66537	-1.87867	18.7867	0	0	27122
841	GS Caltex	0.498534	70	10	3.607417633662270E-01	KOGAS(0.185713); S-Oil(1.167271)	-12.0352	0	11.9648	-7.52199	0	7.47801	-25.0733	-5.71467	19.212	0	0	38235
842	Hanwha	0.200598	70	11	-3.250666231642770E-01	Hanwha(1.000000)	-45.5659	0	11.4341	-179.066	0	44.934	-13.5898	0	3.41017	0	0	35574
843	Hyundai Motor	0.910741	70	8	-2.788553598198190E-01	Hanwha(0.495365); LG Electronics(1.177266)	-2.76702	-2.86529	25.3677	-8.03329	0	81.9667	-1.16036	0	11.8396	0	0	84771
844	KEPCO	1.09898	70	5	4.578762375833210E-01	SK Holdings(0.510617)	0.692873	0	7.69287	7.52262	-6.22756	77.2951	23.8546	-255.696	9.15818	0	0	54252
845	KIA Motor	0.448153	70	3	2.007400356306630E-01	LG Electronics(0.002465); SK Holdings(0.043130); S-Oil(1.475073)	-17.6591	0	14.3409	-13.7962	0	11.2038	-21.522	0	17.478	0	0	44730
846	KOGAS	1.04395	70	9	5.652473446114300E-01	KOGAS(1.000000)	0.263683	0	6.26368	0.878942	0	20.8789	1.36236	0	32.3624	0	0	35411
847	LG Electronics	0.507175	70	11	2.980080865287360E-01	LG Electronics(1.000000)	-16.2632	0	16.7368	-49.2825	0	50.7175	-8.37802	0	8.62198	0	0	57038
848	Lotte Shopping	0.19103	70	9	9.235726614930710E-02	KOGAS(0.223182); SK Holdings(0.034867); S-Oil(0.555981)	-29.9319	0	7.06812	-49.3472	0	11.6528	-59.8638	0	14.1362	0	0	26687
849	POSCO	1.53669	70	7	-1.894621164436040E-01	Hanwha(1.040052); SK Holdings(0.230641)	5.36686	0	15.3669	141.685	-324.038	81.6472	2.68343	0	7.68343	0	0	61504
850	Samsung Electronics	1.9091	70	5	3.275200075753310E-01	Hanwha(4.027801); SK Holdings(0.617922)	26.3638	0	55.3638	144.546	-29.0225	274.524	11.8182	0	24.8182	0	0	208938
851	SK Holdings	0.717421	70	4	-6.417932534564620E-02	SK Holdings(1.000000)	-5.93415	0	15.0658	-59.6241	0	151.376	-7.06447	0	17.9355	0	0	106248
852	S-Oil	1.02819	70	4	-8.469777184541780E-02	S-Oil(1.000000)	0.253691	0	9.25369	0.084564	0	3.08456	0.310066	0	11.3101	0	0	27122
853	GS Caltex	0.66393	71	3	-7.730186447321510E-02	KIA Motor(0.854795)	-8.06568	-3.18686	12.7475	-5.04105	0	9.95895	-16.8035	-17.6605	15.536	0	0	38235
854	Hanwha	0.342513	71	7	-3.799244217170590E-01	Samsung Electronics(0.170261)	-37.4768	-6.53409	12.9891	-147.277	-5.50655	71.2163	-11.1773	0	5.82272	0	0	35574
855	Hyundai Motor	1.4691	71	8	1.409784289550670E-01	KIA Motor(0.481229); Samsung Electronics(0.302700)	14.5422	-15.2728	30.2694	42.2194	0	132.219	6.09835	0	19.0984	0	0	84771
856	KEPCO	1.32686	71	5	1.347438295025950E-01	SK Holdings(0.510617)	2.28803	0	9.28803	24.8414	-7.51888	93.3226	78.7735	-308.716	11.0572	0	0	54252
857	KIA Motor	0.466027	71	9	2.140449897963910E-01	KIA Motor(1.000000)	-17.0871	0	14.9129	-13.3493	0	11.6507	-20.8249	0	18.1751	0	0	44730
858	KOGAS	1.46751	71	11	-9.474775971016250E-02	KOGAS(1.000000)	2.80504	0	8.80504	9.35015	0	29.3501	14.4927	0	45.4927	0	0	35411
859	LG Electronics	0.816139	71	5	-2.089733784616510E-01	KIA Motor(0.418147); Samsung Electronics(0.183472)	-6.06741	-6.69981	20.2328	-18.3861	0	81.6139	-3.12563	0	13.8744	0	0	57038
860	Lotte Shopping	0.207387	71	9	-7.047015751167380E-02	Lotte Shopping(1.000000)	-29.3267	0	7.6733	-48.3494	0	12.6506	-58.6534	0	15.3466	0	0	26687
861	POSCO	2.08139	71	5	-3.286130415352960E-01	Samsung Electronics(0.253814); SK Holdings(0.079744)	10.8139	0	20.8139	285.487	-428.748	120.739	5.40694	0	10.4069	0	0	61504
862	Samsung Electronics	2.63067	71	5	-3.823533787266900E-01	Samsung Electronics(1.000000)	47.2896	0	76.2896	259.277	0	418.277	21.1988	0	34.1988	0	0	208938
863	SK Holdings	0.866182	71	9	-1.847478493375320E-01	SK Holdings(1.000000)	-2.81018	0	18.1898	-28.2356	0	182.764	-3.34545	0	21.6546	0	0	106248
864	S-Oil	2.35479	71	2	1.564579631793020E-01	KIA Motor(0.606349)	12.1931	-12.1507	9.04241	4.06438	0	7.06438	14.9027	-14.8823	11.0204	0	0	27122
865	GS Caltex	0.500465	72	9	-3.628333162723800E-01	KIA Motor(0.576626); S-Oil(0.458760)	-11.9888	0	12.0112	-7.49302	0	7.50698	-24.9767	-10.3701	14.6532	0	0	38235
866	Hanwha	0.231179	72	1	-4.200069261190980E-01	Hyundai Motor(0.419648)	-43.8228	-3.80557	9.37165	-172.216	-24.5761	27.208	-13.07	0	3.93005	0	0	35574
867	Hyundai Motor	0.720392	72	9	2.874403855621260E-01	Hyundai Motor(1.000000)	-8.66785	0	22.3321	-25.1647	0	64.8353	-3.6349	0	9.3651	0	0	84771
868	KEPCO	1.67068	72	3	-3.405718410257900E-01	KEPCO(1.000000)	4.69476	0	11.6948	50.9717	0	126.972	161.634	0	402.634	0	0	54252
869	KIA Motor	0.423868	72	4	-6.729755893281000E-02	KIA Motor(1.000000)	-18.4362	0	13.5638	-14.4033	0	10.5967	-22.4692	0	16.5308	0	0	44730
870	KOGAS	1.53633	72	1	4.691885478562720E-01	Hyundai Motor(0.390448); KEPCO(0.042623)	3.218	0	9.218	10.7267	0	30.7267	16.6263	-26.8084	20.8179	0	0	35411
871	LG Electronics	0.455053	72	2	-8.021064407287260E-02	Hyundai Motor(0.670533); KEPCO(0.003617)	-17.9833	0	15.0167	-54.4947	-1.57184	43.9335	-9.2641	0	7.7359	0	0	57038
872	Lotte Shopping	0.204529	72	9	-1.998984511618180E-02	Lotte Shopping(1.000000)	-29.4324	0	7.56757	-48.5237	0	12.4763	-58.8649	0	15.1351	0	0	26687
873	POSCO	1.61941	72	5	-3.266211764085830E-02	Hyundai Motor(0.723430); KEPCO(0.003284)	6.19414	0	16.1941	163.525	-380.205	47.3207	3.09707	0	8.09707	0	0	61504
874	Samsung Electronics	1.89767	72	8	6.086769889838730E-02	Hyundai Motor(2.462173); KEPCO(0.004002)	26.0324	0	55.0324	142.73	-141.586	160.144	11.6697	0	24.6697	0	0	208938
875	SK Holdings	1.32618	72	7	-3.181620565176260E-03	Hyundai Motor(1.218797); KEPCO(0.053995)	6.84982	0	27.8498	68.8244	-193.947	85.8769	8.15455	0	33.1545	0	0	106248
876	S-Oil	1.0148	72	9	7.193805321453740E-01	S-Oil(1.000000)	0.133184	0	9.13318	0.044395	0	3.0444	0.16278	0	11.1628	0	0	27122
877	GS Caltex	0.641367	73	8	3.957763945616260E-01	Lotte Shopping(0.518619); S-Oil(0.899440)	-8.60719	0	15.3928	-5.37949	0	9.62051	-17.9316	-10.6001	21.4682	0	0	38235
878	Hanwha	0.140837	73	5	2.597375294983640E-01	Samsung Electronics(0.170261)	-48.9723	-2.68673	5.34096	-192.453	-2.26422	29.2832	-14.6058	0	2.39422	0	0	35574
879	Hyundai Motor	0.720188	73	3	-5.545298201506850E-01	LG Electronics(1.086400); Samsung Electronics(0.109147)	-8.67416	-3.7072	18.6186	-25.1831	0	64.8169	-3.63755	0	9.36245	0	0	84771
880	KEPCO	1.14093	73	12	-5.068091344505500E-01	KEPCO(1.000000)	0.986517	0	7.98652	10.7108	0	86.7108	33.9644	0	274.964	0	0	54252
881	KIA Motor	0.560605	73	5	-4.635855187233550E-01	Lotte Shopping(0.178410); Samsung Electronics(0.040183); S-Oil(1.164112)	-14.0607	0	17.9393	-10.9849	0	14.0151	-17.1364	0	21.8636	0	0	44730
882	KOGAS	1.13501	73	9	1.525902720930680E-01	Lotte Shopping(0.580074); Samsung Electronics(0.095390)	0.810078	0	6.81008	2.70026	0	22.7003	4.1854	-26.2085	8.97692	0	0	35411
883	LG Electronics	0.423829	73	4	4.262927811879210E-01	LG Electronics(1.000000)	-19.0136	0	13.9864	-57.6171	0	42.3829	-9.7949	0	7.2051	0	0	57038
884	Lotte Shopping	0.177879	73	4	9.540119311148060E-02	Lotte Shopping(1.000000)	-30.4185	0	6.58153	-50.1494	0	10.8506	-60.8369	0	13.1631	0	0	26687
885	POSCO	0.923372	73	5	2.409414703575680E-02	KEPCO(0.001760); Samsung Electronics(0.293908)	-0.766285	0	9.23372	-20.2299	-193.068	50.7018	-0.383142	0	4.61686	0	0	61504
886	Samsung Electronics	1.0817	73	6	-2.941073130153340E-01	Samsung Electronics(1.000000)	2.36922	0	31.3692	12.9899	0	171.99	1.06206	0	14.0621	0	0	208938
887	SK Holdings	0.759275	73	8	-3.836891392363960E-02	KEPCO(0.043607); Samsung Electronics(0.497192)	-5.05522	0	15.9448	-50.7929	-70.914	89.2931	-6.01812	0	18.9819	0	0	106248
888	S-Oil	1.47987	73	3	1.766856702330550E-01	S-Oil(1.000000)	4.31885	0	13.3188	1.43962	0	4.43962	5.27859	0	16.2786	0	0	27122
889	GS Caltex	0.489628	74	12	2.074735405712530E-02	GS Caltex(1.000000)	-12.2489	0	11.7511	-7.65558	0	7.34442	-25.5186	0	24.4814	0	0	38235
890	Hanwha	0.155559	74	7	1.336329402100070E-02	Samsung Electronics(0.170261)	-48.1331	-2.9676	5.89929	-189.155	-2.50092	32.3444	-14.3555	0	2.64451	0	0	35574
891	Hyundai Motor	0.685912	74	9	5.082264877846500E-01	Hyundai Motor(1.000000)	-9.73672	0	21.2633	-28.2679	0	61.7321	-4.08314	0	8.91686	0	0	84771
892	KEPCO	1.13156	74	5	4.908406337531780E-01	SK Holdings(0.510617)	0.920911	0	7.92091	9.99846	-6.41217	79.5863	31.7057	-263.276	9.42966	0	0	54252
893	KIA Motor	0.581931	74	11	8.977835020431550E-03	GS Caltex(0.879309); Hyundai Motor(0.131054)	-13.3782	-5.50232	13.1195	-10.4517	0	14.5483	-16.3047	0	22.6953	0	0	44730
894	KOGAS	1.07058	74	12	2.582869774104460E-01	KOGAS(1.000000)	0.423493	0	6.42349	1.41164	0	21.4116	2.18804	0	33.188	0	0	35411
895	LG Electronics	0.416762	74	1	-3.393074681142630E-01	GS Caltex(0.065374); Hyundai Motor(0.546902); Samsung Electronics(0.039136)	-19.2469	0	13.7531	-58.3238	0	41.6762	-9.91505	0	7.08495	0	0	57038
896	Lotte Shopping	0.18564	74	12	6.976803753318110E-01	GS Caltex(0.444434); KOGAS(0.069918); Samsung Electronics(0.034547)	-30.1313	0	6.8687	-49.6759	0	11.3241	-60.2626	0	13.7374	0	0	26687
897	POSCO	1.01037	74	7	1.150073105038650E-01	Samsung Electronics(0.271283); SK Holdings(0.045391)	0.103675	0	10.1037	2.73701	-208.127	58.6103	0.051837	0	5.05184	0	0	61504
898	Samsung Electronics	1.19478	74	9	-6.600823305027640E-02	Samsung Electronics(1.000000)	5.64852	0	34.6485	30.9695	0	189.969	2.5321	0	15.5321	0	0	208938
899	SK Holdings	0.738688	74	10	1.917666861027520E-01	SK Holdings(1.000000)	-5.48756	0	15.5124	-55.1369	0	155.863	-6.53281	0	18.4672	0	0	106248
900	S-Oil	1.73659	74	7	-3.806553421527050E-01	GS Caltex(0.709350)	6.62929	-7.29367	8.33562	2.20976	0	5.20976	8.10246	-1.73659	17.3659	0	0	27122
901	GS Caltex	0.594413	75	9	-1.838181905552680E-01	GS Caltex(1.000000)	-9.73408	0	14.2659	-6.0838	0	8.9162	-20.2793	0	29.7207	0	0	38235
902	Hanwha	0.134356	75	4	9.999781342081930E-02	Hanwha(1.000000)	-49.3417	0	7.65829	-193.904	0	30.0957	-14.7159	0	2.28405	0	0	35574
903	Hyundai Motor	0.710689	75	9	3.404713737240500E-01	Hyundai Motor(1.000000)	-8.96865	0	22.0313	-26.038	0	63.962	-3.76105	0	9.23895	0	0	84771
904	KEPCO	1.03933	75	12	1.305901524224540E-01	KEPCO(1.000000)	0.275286	0	7.27529	2.98882	0	78.9888	9.4777	0	250.478	0	0	54252
905	KIA Motor	0.487713	75	9	-1.128848409271250E-02	KIA Motor(1.000000)	-16.3932	0	15.6068	-12.8072	0	12.1928	-19.9792	0	19.0208	0	0	44730
906	KOGAS	1.36993	75	1	6.737273275468590E-01	Hanwha(0.869961); KIA Motor(0.099776)	2.21961	0	8.2196	7.39868	0	27.3987	11.468	-38.5831	3.88486	0	0	35411
907	LG Electronics	0.423535	75	8	1.103831881616920E-01	Hanwha(0.987082); Hyundai Motor(0.163273); KIA Motor(0.180701)	-19.0234	0	13.9766	-57.6465	0	42.3535	-9.79991	0	7.20009	0	0	57038
908	Lotte Shopping	0.214908	75	7	3.772041290431240E-02	Hanwha(0.286040); KIA Motor(0.369135)	-29.0484	0	7.9516	-47.8906	0	13.1094	-58.0968	-8.22862	7.67457	0	0	26687
909	POSCO	0.864927	75	6	2.114449297912710E-02	POSCO(1.000000)	-1.35073	0	8.64927	-35.6594	0	228.341	-0.675367	0	4.32463	0	0	61504
910	Samsung Electronics	1.41537	75	7	3.855119250919350E-01	Hanwha(4.355309); POSCO(0.117975); SK Holdings(0.439974)	12.0458	0	41.0458	66.0443	0	225.044	5.39985	0	18.3998	0	0	208938
911	SK Holdings	0.722034	75	10	9.154543010746540E-02	SK Holdings(1.000000)	-5.83728	0	15.1627	-58.6508	0	152.349	-6.94915	0	18.0509	0	0	106248
912	S-Oil	2.10824	75	2	2.330428282087740E-01	GS Caltex(0.709350)	9.97412	-8.85459	10.1195	3.32471	0	6.32471	12.1906	-2.10824	21.0824	0	0	27122
913	GS Caltex	0.497341	76	6	-1.027141749440230E-01	GS Caltex(1.000000)	-12.0638	0	11.9362	-7.53988	0	7.46012	-25.1329	0	24.8671	0	0	38235
914	Hanwha	0.137678	76	7	-4.763724011874180E-01	Samsung Electronics(0.170261)	-49.1523	-2.62648	5.22119	-193.16	-2.21345	28.6265	-14.6595	0	2.34053	0	0	35574
915	Hyundai Motor	0.691748	76	9	-1.646225311555870E-01	KIA Motor(0.238876); Samsung Electronics(0.354584)	-9.55582	-7.19142	14.2528	-27.7427	0	62.2573	-4.00728	0	8.99272	0	0	84771
916	KEPCO	1.07309	76	9	4.102743843631400E-01	KEPCO(1.000000)	0.511625	0	7.51163	5.55478	0	81.5548	17.6145	0	258.615	0	0	54252
917	KIA Motor	0.442065	76	4	-2.716626158727070E-01	KIA Motor(1.000000)	-17.8539	0	14.1461	-13.9484	0	11.0516	-21.7595	0	17.2405	0	0	44730
918	KOGAS	1.1165	76	11	-4.851811657631270E-01	Lotte Shopping(0.575401); Samsung Electronics(0.095987)	0.699019	0	6.69902	2.33006	0	22.3301	3.6116	-25.7811	8.83052	0	0	35411
919	LG Electronics	0.404493	76	1	1.272185051556560E-01	KIA Motor(0.218475); Samsung Electronics(0.226218)	-19.6517	-3.32055	10.0277	-59.5507	0	40.4493	-10.1236	0	6.87638	0	0	57038
920	Lotte Shopping	0.176399	76	10	8.016098492559960E-02	Lotte Shopping(1.000000)	-30.4732	0	6.52677	-50.2396	0	10.7604	-60.9465	0	13.0535	0	0	26687
921	POSCO	0.900449	76	10	3.520039705606470E-01	Samsung Electronics(0.273170); SK Holdings(0.041681)	-0.995513	0	9.00449	-26.2815	-185.484	52.234	-0.497756	0	4.50224	0	0	61504
922	Samsung Electronics	1.05744	76	6	2.209276435632170E-01	Samsung Electronics(1.000000)	1.66579	0	30.6658	9.1331	0	168.133	0.746732	0	13.7467	0	0	208938
923	SK Holdings	0.716932	76	10	7.821805768888810E-02	SK Holdings(1.000000)	-5.94442	0	15.0556	-59.7273	0	151.273	-7.07669	0	17.9233	0	0	106248
924	S-Oil	1.68616	76	3	-4.189880170187480E-01	S-Oil(1.000000)	6.17541	0	15.1754	2.05847	0	5.05847	7.54772	0	18.5477	0	0	27122
925	GS Caltex	1.24417	77	7	-2.126217020746620E-02	Lotte Shopping(1.432720)	5.86011	-18.5402	11.3199	3.66257	0	18.6626	12.2086	-39.5687	22.6398	0	0	38235
926	Hanwha	0.246874	77	8	3.449771653596670E-01	LG Electronics(0.623689)	-42.9282	-5.92497	8.14683	-168.7	-30.6123	24.6874	-12.8031	0	4.19685	0	0	35574
927	Hyundai Motor	0.769299	77	3	-6.509825422368290E-03	LG Electronics(1.486220)	-7.15175	-4.43478	19.4135	-20.7631	-10.4082	58.8287	-2.99912	0	10.0009	0	0	84771
928	KEPCO	1.35222	77	5	1.527695274458260E-01	KOGAS(1.532066)	2.46557	0	9.46557	26.7691	-71.2172	31.5519	84.8862	-276.981	48.9055	0	0	54252
929	KIA Motor	0.873312	77	2	2.543461172640960E-01	Lotte Shopping(1.676097)	-4.05403	-14.7031	13.2428	-3.16721	0	21.8328	-4.94085	-7.57347	26.4857	0	0	44730
930	KOGAS	1.02972	77	6	-7.019641513763470E-02	KOGAS(1.000000)	0.178306	0	6.17831	0.594352	0	20.5944	0.921246	0	31.9212	0	0	35411
931	LG Electronics	0.395828	77	10	1.287205551366190E-01	LG Electronics(1.000000)	-19.9377	0	13.0623	-60.4172	0	39.5828	-10.2709	0	6.72907	0	0	57038
932	Lotte Shopping	0.21354	77	9	-1.914830636106230E-01	Lotte Shopping(1.000000)	-29.099	0	7.901	-47.974	0	13.026	-58.198	0	15.802	0	0	26687
933	POSCO	1.45119	77	7	2.707442436242480E-01	LG Electronics(1.078299)	4.5119	-0.426821	14.0851	119.114	-340.432	42.6821	2.25595	0	7.25595	0	0	61504
934	Samsung Electronics	1.89612	77	7	-1.953275739448730E-01	LG Electronics(3.663137)	25.9874	-7.13832	47.8491	142.483	-156.485	144.997	11.6495	0	24.6495	0	0	208938
935	SK Holdings	1.10836	77	5	3.588154598632240E-01	KOGAS(0.546954); LG Electronics(1.523192)	2.27566	0	23.2757	22.865	-162.309	71.5563	2.70912	0	27.7091	0	0	106248
936	S-Oil	4.41276	77	8	2.796970898377540E-01	Lotte Shopping(1.016300)	30.7149	-31.6851	8.02979	10.2383	0	13.2383	37.5404	-32.4808	16.0596	0	0	27122
937	GS Caltex	0.79107	78	3	-2.592923568084120E-01	GS Caltex(1.000000)	-5.01433	0	18.9857	-3.13395	0	11.866	-10.4465	0	39.5535	0	0	38235
938	Hanwha	0.134476	78	4	9.819190112174340E-02	Hanwha(1.000000)	-49.3349	0	7.66511	-193.877	0	30.1226	-14.7139	0	2.28609	0	0	35574
939	Hyundai Motor	0.711701	78	12	3.417606627383000E-01	Hyundai Motor(1.000000)	-8.93726	0	22.0627	-25.9469	0	64.0531	-3.74788	0	9.25212	0	0	84771
940	KEPCO	1.18454	78	3	3.312055983184570E-01	SK Holdings(0.510617)	1.2918	0	8.2918	14.0253	-6.71241	83.3129	44.4749	-275.604	9.87119	0	0	54252
941	KIA Motor	0.776779	78	2	3.723751104100360E-01	GS Caltex(0.267754); Lotte Shopping(1.292480)	-7.14309	-9.92154	14.9354	-5.58054	0	19.4195	-8.70564	0	30.2944	0	0	44730
942	KOGAS	1.35894	78	8	-2.675923910714350E-03	Hanwha(0.785587); Lotte Shopping(0.279707)	2.15367	0	8.15367	7.17889	0	27.1789	11.1273	-36.0672	6.06003	0	0	35411
943	LG Electronics	0.433162	78	11	2.694276973275840E-01	Hanwha(0.407079); Hyundai Motor(0.456364); Lotte Shopping(0.145019)	-18.7056	0	14.2944	-56.6838	0	43.3162	-9.63624	0	7.36376	0	0	57038
944	Lotte Shopping	0.206012	78	6	-6.798949388218760E-01	Lotte Shopping(1.000000)	-29.3775	0	7.62246	-48.4332	0	12.5668	-58.7551	0	15.2449	0	0	26687
945	POSCO	1.21284	78	11	-5.659302431953250E-02	Hanwha(1.224493); SK Holdings(0.168887)	2.1284	0	12.1284	56.1897	-255.749	64.4406	1.0642	0	6.0642	0	0	61504
946	Samsung Electronics	1.45233	78	1	-2.242292356673610E-01	Hanwha(4.570769); SK Holdings(0.436126)	13.1176	0	42.1176	71.9207	-22.0787	208.842	5.88031	0	18.8803	0	0	208938
947	SK Holdings	0.773276	78	9	3.059825359030760E-01	SK Holdings(1.000000)	-4.7612	0	16.2388	-47.8387	0	163.161	-5.66809	0	19.3319	0	0	106248
948	S-Oil	2.80573	78	8	-1.599072924556880E-03	GS Caltex(0.709350)	16.2515	-11.7841	13.4675	5.41718	0	8.41718	19.863	-2.80573	28.0573	0	0	27122
949	GS Caltex	0.544988	79	5	1.161042203981090E-01	KOGAS(0.205387); S-Oil(1.141584)	-10.9203	0	13.0797	-6.82518	0	8.17482	-22.7506	-6.24718	21.0022	0	0	38235
950	Hanwha	0.13251	79	11	-6.259992775214660E-01	Samsung Electronics(0.170261)	-49.4469	-2.52788	5.02518	-194.318	-2.13035	27.5519	-14.7473	0	2.25267	0	0	35574
951	Hyundai Motor	0.657708	79	4	3.090311563633280E-02	Hyundai Motor(1.000000)	-10.6111	0	20.3889	-30.8063	0	59.1937	-4.4498	0	8.5502	0	0	84771
952	KEPCO	1.01937	79	4	6.286249988669120E-02	KEPCO(1.000000)	0.135574	0	7.13557	1.47194	0	77.4719	4.66761	0	245.668	0	0	54252
953	KIA Motor	0.463302	79	4	-6.038459014762320E-01	KOGAS(0.034784); Samsung Electronics(0.039442); S-Oil(1.299951)	-17.1744	0	14.8256	-13.4175	0	11.5825	-20.9312	0	18.0688	0	0	44730
954	KOGAS	1.0319	79	12	-1.156756547328490E-01	KOGAS(1.000000)	0.19142	0	6.19142	0.638066	0	20.6381	0.989002	0	31.989	0	0	35411
955	LG Electronics	0.387745	79	9	-3.364427780302710E-02	Hyundai Motor(0.454500); Samsung Electronics(0.070367); S-Oil(0.140370)	-20.2044	0	12.7956	-61.2255	0	38.7745	-10.4083	0	6.59166	0	0	57038
956	Lotte Shopping	0.186294	79	5	-3.782049162764760E-01	KOGAS(0.247076); Samsung Electronics(0.029458); S-Oil(0.434443)	-30.1071	0	6.89289	-49.6361	0	11.3639	-60.2142	0	13.7858	0	0	26687
957	POSCO	0.868707	79	7	-1.803175660285960E-01	KEPCO(0.001853); Samsung Electronics(0.293884)	-1.31293	0	8.68707	-34.6612	-181.639	47.7002	-0.656463	0	4.34354	0	0	61504
958	Samsung Electronics	1.01774	79	10	5.592626186372940E-02	Samsung Electronics(1.000000)	0.514573	0	29.5146	2.82128	0	161.821	0.230671	0	13.2307	0	0	208938
959	SK Holdings	0.713541	79	6	6.532087328145010E-02	KEPCO(0.045867); Samsung Electronics(0.496605)	-6.01563	0	14.9844	-60.4428	-66.6426	83.9146	-7.16147	0	17.8385	0	0	106248
960	S-Oil	1.14929	79	6	-5.543182862700570E-01	S-Oil(1.000000)	1.3436	0	10.3436	0.447865	0	3.44787	1.64217	0	12.6422	0	0	27122
961	GS Caltex	0.52126	80	10	2.859908193096610E-01	GS Caltex(1.000000)	-11.4898	0	12.5102	-7.1811	0	7.8189	-23.937	0	26.063	0	0	38235
962	Hanwha	0.137629	80	8	-1.423864353802810E-01	Samsung Electronics(0.170261)	-49.1551	-2.62554	5.21933	-193.171	-2.21266	28.6163	-14.6603	0	2.3397	0	0	35574
963	Hyundai Motor	0.680882	80	1	3.388383670252910E-01	LG Electronics(1.099413); Samsung Electronics(0.105594)	-9.89267	-3.50487	17.6025	-28.7206	0	61.2794	-4.14854	0	8.85146	0	0	84771
964	KEPCO	1.09854	80	3	3.462898826583390E-01	SK Holdings(0.510617)	0.689775	0	7.68978	7.48899	-6.22506	77.2639	23.748	-255.593	9.15449	0	0	54252
965	KIA Motor	0.446495	80	1	-2.207099985864300E-01	Lotte Shopping(0.135952); Samsung Electronics(0.032750); S-Oil(1.263152)	-17.7122	0	14.2878	-13.8376	0	11.1624	-21.5867	0	17.4133	0	0	44730
966	KOGAS	1.14161	80	2	-3.851931707028720E-01	Lotte Shopping(0.558226); Samsung Electronics(0.098180)	0.84968	0	6.84968	2.83227	0	22.8323	4.39002	-26.3609	9.02912	0	0	35411
967	LG Electronics	0.395955	80	6	1.535246583399470E-01	LG Electronics(1.000000)	-19.9335	0	13.0665	-60.4045	0	39.5955	-10.2688	0	6.73123	0	0	57038
968	Lotte Shopping	0.185916	80	10	-2.874385301971900E-01	Lotte Shopping(1.000000)	-30.1211	0	6.87889	-49.6591	0	11.3409	-60.2422	0	13.7578	0	0	26687
969	POSCO	0.900169	80	1	3.500172222308330E-01	Samsung Electronics(0.273182); SK Holdings(0.041656)	-0.998312	0	9.00169	-26.3554	-185.427	52.2178	-0.499156	0	4.50084	0	0	61504
970	Samsung Electronics	1.05706	80	10	2.049777914783290E-01	Samsung Electronics(1.000000)	1.65485	0	30.6548	9.07314	0	168.073	0.741829	0	13.7418	0	0	208938
971	SK Holdings	0.717132	80	10	-6.497332200066980E-02	SK Holdings(1.000000)	-5.94022	0	15.0598	-59.6851	0	151.315	-7.07169	0	17.9283	0	0	106248
972	S-Oil	1.08623	80	10	-3.175585716611850E-01	S-Oil(1.000000)	0.776095	0	9.77609	0.258698	0	3.2587	0.948561	0	11.9486	0	0	27122
973	GS Caltex	0.518652	81	10	-2.539536120692030E-01	GS Caltex(1.000000)	-11.5524	0	12.4476	-7.22022	0	7.77978	-24.0674	0	25.9326	0	0	38235
974	Hanwha	0.142404	81	9	3.491864527206750E-01	Hanwha(1.000000)	-48.883	0	8.11703	-192.102	0	31.8985	-14.5791	0	2.42087	0	0	35574
975	Hyundai Motor	0.746704	81	8	3.369500886465820E-01	Hanwha(2.009473); KIA Motor(0.297026)	-7.85219	-2.86355	20.2843	-22.7967	0	67.2033	-3.29285	0	9.70715	0	0	84771
976	KEPCO	1.31662	81	3	-5.559066821005680E-01	Samsung Electronics(0.259656)	2.21635	0	9.21635	24.0632	-49.5322	50.531	76.3057	-313.174	4.13147	0	0	54252
977	KIA Motor	0.41803	81	12	-7.806038865103600E-03	KIA Motor(1.000000)	-18.623	0	13.377	-14.5492	0	10.4508	-22.6968	0	16.3032	0	0	44730
978	KOGAS	1.24932	81	8	-3.546577104331610E-02	KIA Motor(0.256184); Samsung Electronics(0.114636)	1.49592	0	7.49592	4.98641	0	24.9864	7.72894	-32.7283	6.00063	0	0	35411
997	GS Caltex	0.622533	83	7	3.122396533770630E-01	KIA Motor(0.854795)	-9.0592	-2.98816	11.9526	-5.662	0	9.338	-18.8733	-16.5594	14.5673	0	0	38235
998	Hanwha	0.283093	83	2	-7.662440390284270E-02	Hyundai Motor(0.320696); POSCO(0.136386)	-40.8637	-4.91246	11.2239	-160.587	0	63.4129	-12.1874	0	4.81259	0	0	35574
999	Hyundai Motor	0.997012	83	3	4.207377511551310E-02	Hyundai Motor(1.000000)	-0.092627	0	30.9074	-0.268918	0	89.7311	-0.038844	0	12.9612	0	0	84771
1000	KEPCO	1.40926	83	11	-6.895789191135830E-01	KOGAS(0.951106); POSCO(0.334488)	2.86483	0	9.86483	31.1039	0	107.104	98.6321	-303.68	35.9525	0	0	54252
1001	KIA Motor	0.43697	83	6	1.844687605589580E-01	KIA Motor(1.000000)	-18.017	0	13.983	-14.0757	0	10.9243	-21.9582	0	17.0418	0	0	44730
1002	KOGAS	1.16481	83	9	7.488259970907810E-02	KOGAS(1.000000)	0.988866	0	6.98887	3.29622	0	23.2962	5.10914	0	36.1091	0	0	35411
1003	LG Electronics	0.605321	83	7	4.622416230753430E-02	Hyundai Motor(0.559508); KIA Motor(0.168875); POSCO(0.033399)	-13.0244	0	19.9756	-39.4679	0	60.5321	-6.70954	0	10.2905	0	0	57038
1004	Lotte Shopping	0.199377	83	8	1.711367070590320E-01	KIA Motor(0.414501); KOGAS(0.211548); POSCO(0.010654)	-29.623	0	7.37695	-48.838	0	12.162	-59.2461	0	14.7539	0	0	26687
1005	POSCO	0.96197	83	9	2.243865079762480E-01	POSCO(1.000000)	-0.380298	0	9.6197	-10.0399	0	253.96	-0.190149	0	4.80985	0	0	61504
1006	Samsung Electronics	2.27776	83	2	-2.136552826437960E-01	Hyundai Motor(1.844601); KIA Motor(0.117517); POSCO(0.769264)	37.0551	0	66.0551	203.164	0	362.164	16.6109	0	29.6109	0	0	208938
1007	SK Holdings	1.13856	83	5	-6.128061683196700E-01	KIA Motor(1.002682); KOGAS(0.197206); POSCO(0.884736)	2.90968	0	23.9097	29.2354	0	240.235	3.46391	0	28.4639	0	0	106248
1008	S-Oil	2.20797	83	8	-4.214188943238940E-01	KIA Motor(0.606349)	10.8717	-11.3931	8.47861	3.62391	0	6.62391	13.2877	-13.9544	10.3333	0	0	27122
1009	GS Caltex	0.518387	84	1	2.722785203662010E-01	KOGAS(0.185923); S-Oil(1.166997)	-11.5587	0	12.4413	-7.22419	0	7.77581	-24.0806	-5.94225	19.9771	0	0	38235
1010	Hanwha	0.27639	84	5	5.749422299637900E-01	Hanwha(1.000000)	-41.2458	0	15.7542	-162.089	0	61.9113	-12.3014	0	4.69862	0	0	35574
1011	Hyundai Motor	1.29913	84	7	-1.309087801254620E-01	Hanwha(1.852481); S-Oil(0.695776)	9.27301	-4.39217	35.8808	26.9217	0	116.922	3.88868	0	16.8887	0	0	84771
1012	KEPCO	1.15536	84	3	9.219109872623920E-02	SK Holdings(0.510617)	1.08754	0	8.08754	11.8076	-6.54706	81.2605	37.4424	-268.814	9.62802	0	0	54252
1013	KIA Motor	0.467029	84	8	4.066124457485720E-01	Hanwha(0.002089); SK Holdings(0.042738); S-Oil(1.479054)	-17.0551	0	14.9449	-13.3243	0	11.6757	-20.7859	0	18.2141	0	0	44730
1014	KOGAS	1.08429	84	10	-2.973833240911290E-01	KOGAS(1.000000)	0.50577	0	6.50577	1.6859	0	21.6859	2.61314	0	33.6131	0	0	35411
1015	LG Electronics	0.730224	84	2	-1.352767486872130E-01	Hanwha(1.148558); S-Oil(0.596535)	-8.90259	-0.261465	23.8359	-26.9776	0	73.0224	-4.58618	0	12.4138	0	0	57038
1016	Lotte Shopping	0.198899	84	3	2.750924444016880E-01	KOGAS(0.223728); SK Holdings(0.034532); S-Oil(0.556581)	-29.6407	0	7.35926	-48.8672	0	12.1328	-59.2815	0	14.7185	0	0	26687
1017	POSCO	0.917825	84	6	2.631607447678550E-01	POSCO(1.000000)	-0.821748	0	9.17825	-21.6941	0	242.306	-0.410874	0	4.58913	0	0	61504
1018	Samsung Electronics	2.33029	84	8	9.797226568777800E-02	Hanwha(3.485732); POSCO(0.183041); SK Holdings(0.693461)	38.5785	0	67.5785	211.517	0	370.517	17.2938	0	30.2938	0	0	208938
1019	SK Holdings	0.754227	84	6	2.651686469434350E-01	SK Holdings(1.000000)	-5.16123	0	15.8388	-51.8581	0	159.142	-6.14432	0	18.8557	0	0	106248
1020	S-Oil	1.06938	84	12	2.403971790412800E-01	S-Oil(1.000000)	0.624462	0	9.62446	0.208154	0	3.20815	0.763232	0	11.7632	0	0	27122
1021	GS Caltex	0.859412	85	8	-3.957271820223790E-02	KOGAS(0.299119); S-Oil(1.019205)	-3.37411	0	20.6259	-2.10882	0	12.8912	-7.0294	-9.85141	33.1192	0	0	38235
1022	Hanwha	0.13399	85	6	3.995221311348540E-01	Samsung Electronics(0.170261)	-49.3626	-2.55612	5.08133	-193.986	-2.15415	27.8597	-14.7222	0	2.27784	0	0	35574
1023	Hyundai Motor	0.706896	85	4	6.519498746418870E-01	Samsung Electronics(0.382011); S-Oil(0.182668)	-9.08622	-7.17562	14.7382	-26.3793	0	63.6207	-3.81035	0	9.18965	0	0	84771
1024	KEPCO	1.10704	85	2	1.695845098258810E-01	Samsung Electronics(0.259656)	0.749258	0	7.74926	8.1348	-41.6475	42.4873	25.7959	-263.322	3.47381	0	0	54252
1025	KIA Motor	0.708525	85	2	1.049322998112230E-02	KOGAS(0.049128); Samsung Electronics(0.059652); S-Oil(1.125531)	-9.32721	0	22.6728	-7.28689	0	17.7131	-11.3675	0	27.6325	0	0	44730
1026	KOGAS	1.11733	85	12	4.219393151744180E-01	KOGAS(1.000000)	0.703995	0	6.70399	2.34665	0	22.3467	3.63731	0	34.6373	0	0	35411
1027	LG Electronics	0.420917	85	4	-4.613051622657220E-01	Samsung Electronics(0.250906); S-Oil(0.170125)	-19.1098	-3.29398	10.5963	-57.9083	0	42.0917	-9.84442	0	7.15558	0	0	57038
1028	Lotte Shopping	0.238583	85	8	-1.182826035335160E-01	KOGAS(0.292233); Samsung Electronics(0.037309); S-Oil(0.315002)	-28.1724	0	8.82759	-46.4464	0	14.5536	-56.3448	0	17.6552	0	0	26687
1029	POSCO	0.878512	85	3	3.238380416962300E-01	Samsung Electronics(0.294365)	-1.21488	0	8.78512	-32.0728	-183.76	48.1667	-0.60744	-0.454403	3.93816	0	0	61504
1030	Samsung Electronics	1.02911	85	12	-8.194141725333400E-02	Samsung Electronics(1.000000)	0.844327	0	29.8443	4.62924	0	163.629	0.378491	0	13.3785	0	0	208938
1031	SK Holdings	0.72268	85	11	1.844149258470700E-01	Samsung Electronics(0.508514)	-5.82373	0	15.1763	-58.5146	-69.2776	83.2078	-6.93301	-11.2638	6.80316	0	0	106248
1032	S-Oil	2.02997	85	1	5.048370457810880E-02	S-Oil(1.000000)	9.26972	0	18.2697	3.08991	0	6.08991	11.3297	0	22.3297	0	0	27122
1033	GS Caltex	0.501847	86	10	-6.632559910201330E-01	Lotte Shopping(0.409310); S-Oil(1.006996)	-11.9557	0	12.0443	-7.4723	0	7.5277	-24.9077	-8.29422	16.7981	0	0	38235
1034	Hanwha	0.133007	86	4	-5.797754950447220E-02	Hanwha(1.000000)	-49.4186	0	7.58138	-194.206	0	29.7935	-14.7389	0	2.26111	0	0	35574
1035	Hyundai Motor	0.658939	86	4	2.486925267458010E-02	Hyundai Motor(1.000000)	-10.5729	0	20.4271	-30.6955	0	59.3045	-4.4338	0	8.5662	0	0	84771
1036	KEPCO	1.4428	86	1	2.160901428867820E-01	SK Holdings(0.510617)	3.09963	0	10.0996	33.6531	-8.17589	101.477	106.716	-335.692	12.0234	0	0	54252
1037	KIA Motor	0.434772	86	2	2.513386395307500E-01	LG Electronics(0.127229); Lotte Shopping(0.216442); S-Oil(1.168679)	-18.0873	0	13.9127	-14.1307	0	10.8693	-22.0439	0	16.9561	0	0	44730
1038	KOGAS	1.29773	86	2	3.925655896232680E-01	Hanwha(0.345988); LG Electronics(0.405043)	1.78636	0	7.78636	5.95453	0	25.9545	9.22952	-36.7873	3.4422	0	0	35411
1039	LG Electronics	0.386289	86	4	4.603587540945430E-02	LG Electronics(1.000000)	-20.2525	0	12.7475	-61.3711	0	38.6289	-10.4331	0	6.56691	0	0	57038
1040	Lotte Shopping	0.176354	86	12	-6.330269439837810E-02	Lotte Shopping(1.000000)	-30.4749	0	6.5251	-50.2424	0	10.7576	-60.9498	0	13.0502	0	0	26687
1041	POSCO	1.26919	86	3	1.025070228865880E-01	Hanwha(1.295541); SK Holdings(0.145099)	2.69193	0	12.6919	71.0671	-267.632	67.4348	1.34597	0	6.34597	0	0	61504
1042	Samsung Electronics	1.49895	86	8	-6.404935075186780E-01	Hanwha(4.769598); SK Holdings(0.369554)	14.4696	0	43.4696	79.3336	-22.7875	215.546	6.48639	0	19.4864	0	0	208938
1043	SK Holdings	0.94187	86	11	2.754872016211850E-01	SK Holdings(1.000000)	-1.22073	0	19.7793	-12.2654	0	198.735	-1.45325	0	23.5468	0	0	106248
1044	S-Oil	1.03427	86	4	1.112789189783040E-01	S-Oil(1.000000)	0.308409	0	9.30841	0.102803	0	3.1028	0.376944	0	11.3769	0	0	27122
1045	GS Caltex	1.12751	87	5	-2.540359376628390E-01	Lotte Shopping(1.432720)	3.06019	-16.8017	10.2585	1.91262	0	16.9126	6.3754	-35.8585	20.5169	0	0	38235
1046	Hanwha	0.186497	87	3	3.397987140401260E-01	Hanwha(1.000000)	-46.3697	0	10.6303	-182.225	0	41.7753	-13.8296	0	3.17045	0	0	35574
1047	Hyundai Motor	0.777732	87	3	2.085767295590170E-01	Hanwha(0.455004); LG Electronics(1.202438)	-6.89032	-2.44683	21.6629	-20.0041	0	69.9959	-2.88949	0	10.1105	0	0	84771
1048	KEPCO	1.15077	87	2	4.751114042450110E-02	POSCO(0.044539); SK Holdings(0.484834)	1.05539	0	8.05539	11.4585	0	87.4585	36.3355	-268.021	9.3144	0	0	54252
1049	KIA Motor	0.791423	87	8	4.218642721177920E-01	Lotte Shopping(1.676097)	-6.67446	-13.3245	12.0011	-5.21442	0	19.7856	-8.1345	-6.86332	24.0022	0	0	44730
1050	KOGAS	1.36331	87	3	2.534487054831910E-01	Lotte Shopping(0.913267); SK Holdings(0.103895)	2.17985	0	8.17985	7.26617	0	27.2662	11.2626	-27.2311	15.0315	0	0	35411
1051	LG Electronics	0.424038	87	9	2.469021513135030E-01	LG Electronics(1.000000)	-19.0068	0	13.9932	-57.5962	0	42.4038	-9.79136	0	7.20864	0	0	57038
1052	Lotte Shopping	0.193517	87	10	4.357808395981560E-01	Lotte Shopping(1.000000)	-29.8399	0	7.16014	-49.1954	0	11.8046	-59.6797	0	14.3203	0	0	26687
1053	POSCO	0.89535	87	4	-1.594934683902200E-01	POSCO(1.000000)	-1.0465	0	8.9535	-27.6276	0	236.372	-0.52325	0	4.47675	0	0	61504
1054	Samsung Electronics	1.75018	87	7	-6.605250631723310E-01	Hanwha(1.440954); LG Electronics(2.193967); POSCO(0.529039)	21.7553	0	50.7553	119.279	0	278.279	9.75236	0	22.7524	0	0	208938
1055	SK Holdings	0.75201	87	4	2.528135198125620E-01	SK Holdings(1.000000)	-5.20778	0	15.7922	-52.3258	0	158.674	-6.19974	0	18.8003	0	0	106248
1056	S-Oil	3.99899	87	2	1.405241666366470E-02	Lotte Shopping(1.016300)	26.9909	-28.7141	7.27685	8.99697	0	11.997	32.9889	-29.4352	14.5537	0	0	27122
1057	GS Caltex	1.12028	88	5	1.478558711858510E-01	GS Caltex(1.000000)	2.88677	0	26.8868	1.80423	0	16.8042	6.01411	0	56.0141	0	0	38235
1058	Hanwha	0.131752	88	9	-4.413176776622950E-01	Samsung Electronics(0.170261)	-49.4901	-2.51342	4.99643	-194.488	-2.11816	27.3942	-14.7602	0	2.23978	0	0	35574
1059	Hyundai Motor	0.666754	88	10	6.628128343266130E-02	Hyundai Motor(1.000000)	-10.3306	0	20.6694	-29.9921	0	60.0079	-4.33219	0	8.66781	0	0	84771
1060	KEPCO	1.08854	88	2	2.124194838882560E-01	Samsung Electronics(0.259656)	0.619796	0	7.6198	6.72921	-40.9517	41.7775	21.3387	-258.923	3.41577	0	0	54252
1061	KIA Motor	0.985133	88	5	1.430188458774290E-02	KIA Motor(1.000000)	-0.475744	0	31.5243	-0.371675	0	24.6283	-0.579813	0	38.4202	0	0	44730
1062	KOGAS	1.04096	88	10	-1.290025916709920E-01	KOGAS(1.000000)	0.245767	0	6.24577	0.819222	0	20.8192	1.26979	0	32.2698	0	0	35411
1063	LG Electronics	0.404671	88	9	-4.709087661481520E-02	Hyundai Motor(0.603542); KOGAS(0.042547); Samsung Electronics(0.020908)	-19.6459	0	13.3541	-59.5329	0	40.4671	-10.1206	0	6.87941	0	0	57038
1064	Lotte Shopping	0.260824	88	7	-4.445924377772670E-01	GS Caltex(0.206551); Hyundai Motor(0.136936); KOGAS(0.202800)	-27.3495	0	9.65051	-45.0897	0	15.9103	-54.699	0	19.301	0	0	26687
1065	POSCO	0.863835	88	3	-7.819825363836500E-01	Samsung Electronics(0.294365)	-1.36165	0	8.63835	-35.9475	-180.691	47.362	-0.680824	-0.446811	3.87236	0	0	61504
1066	Samsung Electronics	1.01192	88	10	-6.831372548648690E-03	Samsung Electronics(1.000000)	0.345736	0	29.3457	1.89559	0	160.896	0.154985	0	13.155	0	0	208938
1067	SK Holdings	0.710606	88	5	6.970259760429120E-02	Samsung Electronics(0.508514)	-6.07727	0	14.9227	-61.0621	-68.1202	81.8177	-7.23484	-11.0757	6.6895	0	0	106248
1068	S-Oil	3.97336	88	2	3.792964418850020E-02	GS Caltex(0.709350)	26.7602	-16.6881	19.0721	8.92008	0	11.9201	32.707	-3.97336	39.7336	0	0	27122
1069	GS Caltex	0.490164	89	4	2.920554753473640E-02	GS Caltex(1.000000)	-12.2361	0	11.7639	-7.64754	0	7.35246	-25.4918	0	24.5082	0	0	38235
1070	Hanwha	0.134081	89	1	-5.131761855286680E-01	Samsung Electronics(0.170261)	-49.3574	-2.55785	5.08476	-193.966	-2.15561	27.8785	-14.7206	0	2.27937	0	0	35574
979	LG Electronics	0.43345	81	7	2.262969253063830E-01	Hanwha(1.272677); KIA Motor(0.262995)	-18.6962	-0.455407	13.8484	-56.655	0	43.345	-9.63135	0	7.36865	0	0	57038
980	Lotte Shopping	0.189165	81	5	1.228347839569550E-01	KIA Motor(0.426690); Samsung Electronics(0.036380)	-30.0009	0	6.99911	-49.4609	0	11.5391	-60.0018	-6.46296	7.53525	0	0	26687
981	POSCO	1.04483	81	9	-3.550456118546770E-01	Samsung Electronics(0.294365)	0.448322	0	10.4483	11.8357	-218.55	57.2856	0.224161	-0.54043	4.68373	0	0	61504
982	Samsung Electronics	1.22395	81	9	-1.558294091777620E-01	Samsung Electronics(1.000000)	6.49446	0	35.4945	35.6076	0	194.608	2.91131	0	15.9113	0	0	208938
983	SK Holdings	0.859498	81	7	-1.229926608084910E-01	Samsung Electronics(0.508514)	-2.95055	0	18.0494	-29.646	-82.3932	98.9608	-3.51256	-13.3963	8.09113	0	0	106248
984	S-Oil	1.83953	81	1	4.009696414576790E-01	GS Caltex(0.709350)	7.55575	-7.72602	8.82973	2.51858	0	5.51858	9.23481	-1.83953	18.3953	0	0	27122
985	GS Caltex	0.598668	82	9	-2.081375670089550E-01	GS Caltex(1.000000)	-9.63197	0	14.368	-6.01998	0	8.98002	-20.0666	0	29.9334	0	0	38235
986	Hanwha	0.132912	82	4	4.848139230946760E-02	Hanwha(1.000000)	-49.424	0	7.57599	-194.228	0	29.7723	-14.7405	0	2.25951	0	0	35574
987	Hyundai Motor	0.74794	82	11	2.376325629913430E-01	GS Caltex(0.157751); Hanwha(2.213397)	-7.81387	-4.15088	19.0353	-22.6854	0	67.3146	-3.27678	0	9.72321	0	0	84771
988	KEPCO	1.10014	82	3	-2.024608807147640E-01	SK Holdings(0.510617)	0.700973	0	7.70097	7.61057	-6.23412	77.3764	24.1335	-255.966	9.16783	0	0	54252
989	KIA Motor	0.690717	82	2	-2.736413650598760E-01	GS Caltex(0.876097); Hanwha(0.315749)	-9.89704	-7.12307	14.9799	-7.73207	0	17.2679	-12.062	0	26.938	0	0	44730
990	KOGAS	1.26764	82	9	-3.063298648511800E-01	KOGAS(1.000000)	1.60584	0	7.60584	5.35281	0	25.3528	8.29685	0	39.2969	0	0	35411
991	LG Electronics	0.444444	82	1	1.314645203424120E-01	GS Caltex(0.142984); Hanwha(1.449683)	-18.3333	-1.62948	13.0372	-55.5556	0	44.4444	-9.44445	0	7.55555	0	0	57038
992	Lotte Shopping	0.216917	82	8	-1.693011345130510E-01	GS Caltex(0.375160); Hanwha(0.238463); KOGAS(0.108996)	-28.9741	0	8.02591	-47.7681	0	13.2319	-57.9482	0	16.0518	0	0	26687
993	POSCO	0.882192	82	9	6.213581022274200E-01	POSCO(1.000000)	-1.17809	0	8.82192	-31.1014	0	232.899	-0.589042	0	4.41096	0	0	61504
994	Samsung Electronics	1.40334	82	5	-7.305725980103000E-02	Hanwha(4.365179); POSCO(0.114682); SK Holdings(0.438575)	11.6967	0	40.6967	64.1304	0	223.13	5.24337	0	18.2434	0	0	208938
995	SK Holdings	0.718177	82	10	6.356892520782650E-02	SK Holdings(1.000000)	-5.91829	0	15.0817	-59.4647	0	151.535	-7.04558	0	17.9544	0	0	106248
996	S-Oil	2.12333	82	1	-3.377965035988460E-01	GS Caltex(0.709350)	10.1099	-8.91797	10.192	3.36998	0	6.36998	12.3566	-2.12332	21.2333	0	0	27122
1071	Hyundai Motor	0.664926	89	9	1.693795220087750E-01	LG Electronics(1.098480); Samsung Electronics(0.105849)	-10.3873	-3.42273	17.19	-30.1566	0	59.8434	-4.35596	0	8.64404	0	0	84771
1072	KEPCO	1.05099	89	6	-1.848089822252640E-01	KEPCO(1.000000)	0.356959	0	7.35696	3.87556	0	79.8756	12.2896	0	253.29	0	0	54252
1073	KIA Motor	0.575069	89	11	-2.608241655612920E-01	GS Caltex(0.859206); LG Electronics(0.208252)	-13.5978	-5.63495	12.7673	-10.6233	0	14.3767	-16.5723	0	22.4277	0	0	44730
1074	KOGAS	1.10548	89	8	3.543061999882620E-01	GS Caltex(0.249481); Samsung Electronics(0.123827)	0.632894	0	6.63289	2.10965	0	22.1096	3.26995	-26.4979	7.77205	0	0	35411
1075	LG Electronics	0.387004	89	10	-5.941912522166380E-02	LG Electronics(1.000000)	-20.2289	0	12.7711	-61.2996	0	38.7004	-10.4209	0	6.57908	0	0	57038
1076	Lotte Shopping	0.178551	89	12	5.951658319588370E-01	GS Caltex(0.443242); Samsung Electronics(0.046615)	-30.3936	0	6.6064	-50.1084	0	10.8916	-60.7872	-1.72568	11.4871	0	0	26687
1077	POSCO	0.879033	89	3	-1.613625115437240E-01	KEPCO(0.001819); Samsung Electronics(0.293893)	-1.20967	0	8.79033	-31.9353	-183.798	48.2672	-0.604836	0	4.39516	0	0	61504
1078	Samsung Electronics	1.02981	89	4	9.806667147291830E-02	Samsung Electronics(1.000000)	0.864476	0	29.8645	4.73972	0	163.74	0.387524	0	13.3875	0	0	208938
1079	SK Holdings	0.722315	89	1	3.071680986078150E-01	KEPCO(0.045034); Samsung Electronics(0.496821)	-5.83138	0	15.1686	-58.5915	-67.462	84.9465	-6.94212	0	18.0579	0	0	106248
1080	S-Oil	1.73849	89	1	-7.821912499384130E-02	GS Caltex(0.709350)	6.6464	-7.30165	8.34475	2.21547	0	5.21547	8.12337	-1.73849	17.3849	0	0	27122
1081	GS Caltex	0.504098	90	7	3.114609540249480E-01	Samsung Electronics(0.021871); S-Oil(1.241254)	-11.9017	0	12.0983	-7.43853	0	7.56147	-24.7951	-10.9484	14.2565	0	0	38235
1082	Hanwha	0.13579	90	6	-1.530345859688490E-01	Hanwha(1.000000)	-49.2599	0	7.74005	-193.583	0	30.417	-14.6916	0	2.30844	0	0	35574
1083	Hyundai Motor	0.697832	90	11	6.166539667755450E-01	Samsung Electronics(0.359213); S-Oil(0.358300)	-9.3672	-7.08361	14.5492	-27.1951	0	62.8049	-3.92818	0	9.07182	0	0	84771
1084	KEPCO	1.12436	90	12	4.607337610760850E-01	KEPCO(1.000000)	0.870511	0	7.87051	9.45126	0	85.4513	29.9704	0	270.97	0	0	54252
1085	KIA Motor	0.427049	90	4	-7.201055492010330E-01	Samsung Electronics(0.037939); S-Oil(1.356948)	-18.3344	0	13.6656	-14.3238	0	10.6762	-22.3451	-0.872527	15.7824	0	0	44730
1086	KOGAS	1.15353	90	1	2.387105407221410E-01	Samsung Electronics(0.128695); S-Oil(0.314198)	0.921209	0	6.92121	3.0707	0	23.0707	4.75958	-30.421	5.33853	0	0	35411
1087	LG Electronics	0.406206	90	5	-1.329025655070740E-01	Samsung Electronics(0.230644); S-Oil(0.326218)	-19.5952	-3.17886	10.2259	-59.3794	0	40.6206	-10.0945	0	6.90551	0	0	57038
1088	Lotte Shopping	0.184959	90	11	6.750762813512410E-01	Samsung Electronics(0.055791); S-Oil(0.554166)	-30.1565	0	6.84348	-49.7175	0	11.2825	-60.313	-6.67558	7.01137	0	0	26687
1089	POSCO	0.922243	90	9	1.910023359106830E-01	KEPCO(0.001784); Samsung Electronics(0.293902)	-0.777566	0	9.22243	-20.5278	-192.832	50.6398	-0.388783	0	4.61122	0	0	61504
1090	Samsung Electronics	1.0804	90	10	-3.003577288759140E-01	Samsung Electronics(1.000000)	2.33155	0	31.3315	12.7833	0	171.783	1.04518	0	14.0452	0	0	208938
1091	SK Holdings	0.758135	90	7	-1.079785575395700E-01	KEPCO(0.044183); Samsung Electronics(0.497042)	-5.07916	0	15.9208	-51.0334	-70.8075	89.159	-6.04662	0	18.9534	0	0	106248
1092	S-Oil	1.02165	90	10	6.446761089015340E-02	S-Oil(1.000000)	0.19481	0	9.19481	0.064937	0	3.06494	0.238101	0	11.2381	0	0	27122
1093	GS Caltex	0.53171	91	2	-4.049166650096720E-01	Lotte Shopping(0.427715); S-Oil(0.988886)	-11.239	0	12.761	-7.02435	0	7.97565	-23.4145	-8.78778	17.7977	0	0	38235
1094	Hanwha	0.131377	91	12	-1.194889713025850E-02	Hanwha(1.000000)	-49.5115	0	7.4885	-194.571	0	29.4285	-14.7666	0	2.23341	0	0	35574
1095	Hyundai Motor	0.702689	91	11	5.582223379238380E-01	Hanwha(2.107979); S-Oil(0.360658)	-9.21664	-2.37569	19.4077	-26.758	0	63.242	-3.86504	0	9.13496	0	0	84771
1096	KEPCO	1.25385	91	8	2.764465992824630E-01	Samsung Electronics(0.259656)	1.77696	0	8.77696	19.2927	-47.1708	48.122	61.1782	-298.244	3.9345	0	0	54252
1097	KIA Motor	0.460955	91	12	4.837994135550270E-01	Lotte Shopping(0.145935); Samsung Electronics(0.030662); S-Oil(1.269411)	-17.2494	0	14.7506	-13.4761	0	11.5239	-21.0228	0	17.9772	0	0	44730
1098	KOGAS	1.15345	91	6	-5.617791388848920E-01	KOGAS(1.000000)	0.920674	0	6.92067	3.06891	0	23.0689	4.75681	0	35.7568	0	0	35411
1099	LG Electronics	0.410499	91	12	6.267310190953120E-01	Hanwha(1.358345); S-Oil(0.321371)	-19.4535	-0.146983	13.3995	-58.9501	0	41.0499	-10.0215	0	6.97848	0	0	57038
1100	Lotte Shopping	0.178808	91	4	-1.305407345596510E-01	Lotte Shopping(1.000000)	-30.3841	0	6.61589	-50.0927	0	10.9073	-60.7682	0	13.2318	0	0	26687
1101	POSCO	0.99502	91	7	-2.026602514335210E-01	Samsung Electronics(0.294365)	-0.049802	0	9.9502	-1.31478	-208.131	54.5545	-0.024901	-0.514665	4.46043	0	0	61504
1102	Samsung Electronics	1.1656	91	12	6.018274765069400E-01	Samsung Electronics(1.000000)	4.80226	0	33.8023	26.3297	0	185.33	2.15274	0	15.1527	0	0	208938
1103	SK Holdings	0.818521	91	11	1.793502874928490E-01	Samsung Electronics(0.508514)	-3.81106	0	17.1889	-38.2921	-78.4651	94.2428	-4.53697	-12.7576	7.70539	0	0	106248
1104	S-Oil	1.11588	91	4	4.324442930915750E-01	S-Oil(1.000000)	1.04294	0	10.0429	0.347647	0	3.34765	1.2747	0	12.2747	0	0	27122
1105	GS Caltex	0.769269	92	2	2.481269525137070E-01	KOGAS(0.201013); S-Oil(1.147294)	-5.53754	0	18.4625	-3.46096	0	11.539	-11.5365	-8.8181	29.6454	0	0	38235
1106	Hanwha	0.273629	92	8	2.249575000554240E-01	LG Electronics(0.455919); POSCO(0.155588)	-41.4031	-6.52456	9.0723	-162.707	0	61.2929	-12.3483	0	4.65169	0	0	35574
1107	Hyundai Motor	0.963744	92	8	-5.024614511086330E-02	LG Electronics(1.421748); POSCO(0.059791)	-1.12394	-5.53935	24.3367	-3.26307	0	86.7369	-0.471332	0	12.5287	0	0	84771
1108	KEPCO	1.09919	92	6	3.440304732102190E-01	KEPCO(1.000000)	0.694332	0	7.69433	7.53846	0	83.5385	23.9049	0	264.905	0	0	54252
1109	KIA Motor	0.655508	92	5	-5.188706824061610E-02	KOGAS(0.056585); LG Electronics(0.174676); S-Oil(1.207990)	-11.0237	0	20.9763	-8.61229	0	16.3877	-13.4352	0	25.5648	0	0	44730
1110	KOGAS	1.48826	92	3	1.742223156196680E-01	KOGAS(1.000000)	2.92956	0	8.92956	9.76521	0	29.7652	15.1361	0	46.1361	0	0	35411
1111	LG Electronics	0.506864	92	11	3.281271562616560E-01	LG Electronics(1.000000)	-16.2735	0	16.7265	-49.3136	0	50.6864	-8.38331	0	8.61669	0	0	57038
1112	Lotte Shopping	0.266133	92	2	6.730670299792730E-02	KOGAS(0.261669); LG Electronics(0.131721); S-Oil(0.365311)	-27.1531	0	9.84693	-44.7659	0	16.2341	-54.3062	0	19.6939	0	0	26687
1113	POSCO	0.92961	92	6	3.066697052035160E-01	POSCO(1.000000)	-0.703899	0	9.2961	-18.5829	0	245.417	-0.351949	0	4.64805	0	0	61504
1114	Samsung Electronics	2.13889	92	5	-4.452151973703600E-02	LG Electronics(2.790307); POSCO(0.809451)	33.0278	-7.83098	54.1969	181.084	0	340.084	14.8056	0	27.8056	0	0	208938
1115	SK Holdings	1.06062	92	3	9.974701659684780E-02	SK Holdings(1.000000)	1.27309	0	22.2731	12.7915	0	223.792	1.51558	0	26.5156	0	0	106248
1116	S-Oil	1.61418	92	11	-4.846322661925670E-01	S-Oil(1.000000)	5.52766	0	14.5277	1.84255	0	4.84255	6.75603	0	17.756	0	0	27122
1117	GS Caltex	0.519486	93	12	2.817681594857560E-01	GS Caltex(1.000000)	-11.5323	0	12.4677	-7.20772	0	7.79228	-24.0257	0	25.9743	0	0	38235
1118	Hanwha	0.202075	93	3	-6.243374994661640E-02	Hanwha(1.000000)	-45.4817	0	11.5183	-178.735	0	45.2649	-13.5647	0	3.43528	0	0	35574
1119	Hyundai Motor	0.71159	93	10	3.594140669074580E-01	Hyundai Motor(1.000000)	-8.94072	0	22.0593	-25.9569	0	64.0431	-3.74933	0	9.25067	0	0	84771
1120	KEPCO	1.24825	93	8	-1.183443921590680E-01	POSCO(0.046796); SK Holdings(0.483528)	1.73776	0	8.73776	18.8671	0	94.8671	59.8286	-290.725	10.1034	0	0	54252
1121	KIA Motor	0.458203	93	4	4.128497361040000E-01	KIA Motor(1.000000)	-17.3375	0	14.6625	-13.5449	0	11.4551	-21.1301	0	17.8699	0	0	44730
1122	KOGAS	1.01865	93	6	-5.670804850263810E-02	KOGAS(1.000000)	0.111913	0	6.11191	0.373042	0	20.373	0.578215	0	31.5782	0	0	35411
1123	LG Electronics	0.393552	93	10	1.374309517253550E-01	LG Electronics(1.000000)	-20.0128	0	12.9872	-60.6448	0	39.3552	-10.3096	0	6.69038	0	0	57038
1124	Lotte Shopping	0.187892	93	12	-4.093880439481740E-01	KIA Motor(0.305442); KOGAS(0.252258); LG Electronics(0.071739)	-30.048	0	6.95202	-49.5386	0	11.4614	-60.096	0	13.904	0	0	26687
1125	POSCO	0.924348	93	12	3.149489292641960E-01	POSCO(1.000000)	-0.756515	0	9.24348	-19.972	0	244.028	-0.378258	0	4.62174	0	0	61504
1126	Samsung Electronics	1.68976	93	7	-4.446704738188620E-01	Hyundai Motor(1.512600); LG Electronics(0.794023); POSCO(0.575961)	20.0029	0	49.0029	109.671	0	268.671	8.96682	0	21.9668	0	0	208938
1127	SK Holdings	0.817918	93	9	2.764217840952780E-02	SK Holdings(1.000000)	-3.82373	0	17.1763	-38.4194	0	172.581	-4.55206	0	20.4479	0	0	106248
1128	S-Oil	1.84249	93	7	-7.745490375924940E-01	GS Caltex(0.709350)	7.58237	-7.73844	8.84393	2.52746	0	5.52746	9.26734	-1.84249	18.4249	0	0	27122
1129	GS Caltex	0.548432	94	4	-4.855791303637590E-01	GS Caltex(1.000000)	-10.8376	0	13.1624	-6.77352	0	8.22648	-22.5784	0	27.4216	0	0	38235
1130	Hanwha	0.1488	94	8	-1.521356888903230E-01	Samsung Electronics(0.170261)	-48.5184	-2.83865	5.64296	-190.669	-2.39225	30.939	-14.4704	0	2.5296	0	0	35574
1131	Hyundai Motor	0.715373	94	5	5.144800218011340E-01	LG Electronics(1.110329); Samsung Electronics(0.102615)	-8.82344	-3.68241	18.4942	-25.6164	0	64.3836	-3.70015	0	9.29985	0	0	84771
1132	KEPCO	1.19615	94	8	-9.821204992950030E-02	POSCO(0.244366); Samsung Electronics(0.187723)	1.37305	0	8.37305	14.9074	0	90.9074	47.2722	-284.407	3.86471	0	0	54252
1133	KIA Motor	0.442566	94	12	-2.577861293222100E-01	KIA Motor(1.000000)	-17.8379	0	14.1621	-13.9358	0	11.0642	-21.7399	0	17.2601	0	0	44730
1134	KOGAS	1.21288	94	3	4.130011474224750E-01	KIA Motor(0.234922); Samsung Electronics(0.119188)	1.27725	0	7.27725	4.2575	0	24.2575	6.59913	-31.7735	5.82558	0	0	35411
1135	LG Electronics	0.411923	94	12	3.139243495113930E-01	LG Electronics(1.000000)	-19.4066	0	13.5934	-58.8077	0	41.1923	-9.99731	0	7.00269	0	0	57038
1136	Lotte Shopping	0.192916	94	11	6.366657695620980E-02	KIA Motor(0.411025); Samsung Electronics(0.039734)	-29.8621	0	7.13787	-49.2322	0	11.7678	-59.7243	-6.5911	7.68465	0	0	26687
1137	POSCO	0.880376	94	4	9.661708782158150E-02	POSCO(1.000000)	-1.19624	0	8.80376	-31.5808	0	232.419	-0.598122	0	4.40188	0	0	61504
1138	Samsung Electronics	1.14286	94	10	5.156056369622670E-01	Samsung Electronics(1.000000)	4.14301	0	33.143	22.7151	0	181.715	1.85721	0	14.8572	0	0	208938
1139	SK Holdings	0.784047	94	7	-4.153283372096330E-01	POSCO(0.408147); Samsung Electronics(0.388370)	-4.53501	0	16.465	-45.5661	0	165.434	-5.39882	-12.0345	7.56671	0	0	106248
1140	S-Oil	1.94515	94	1	5.104908425216910E-02	GS Caltex(0.709350)	8.50636	-8.16963	9.33673	2.83545	0	5.83545	10.3967	-1.94515	19.4515	0	0	27122
1141	GS Caltex	0.521064	95	1	3.277850099752500E-01	KOGAS(0.198117); S-Oil(1.151076)	-11.4945	0	12.5055	-7.18405	0	7.81595	-23.9468	-5.97293	20.0802	0	0	38235
1142	Hanwha	0.134629	95	4	-1.020665753374300E-01	Hanwha(1.000000)	-49.3262	0	7.67383	-193.843	0	30.1568	-14.7113	0	2.28869	0	0	35574
1143	Hyundai Motor	0.716006	95	1	-5.369249295764510E-01	Hanwha(2.096055); S-Oil(0.376297)	-8.80381	-2.42071	19.7755	-25.5595	0	64.4405	-3.69192	0	9.30808	0	0	84771
1144	KEPCO	1.21147	95	9	-1.143708382138190E-01	KEPCO(1.000000)	1.48031	0	8.48031	16.0719	0	92.0719	50.9648	0	291.965	0	0	54252
1145	KIA Motor	0.460952	95	7	-3.281883755857820E-01	Hanwha(0.201443); KOGAS(0.056890); S-Oil(1.310719)	-17.2495	0	14.7505	-13.4762	0	11.5238	-21.0229	0	17.9771	0	0	44730
1146	KOGAS	1.02281	95	6	-5.510316785234070E-02	KOGAS(1.000000)	0.136854	0	6.13685	0.456178	0	20.4562	0.707077	0	31.7071	0	0	35411
1147	LG Electronics	0.417513	95	1	6.581069257588150E-01	Hanwha(1.348189); S-Oil(0.334693)	-19.2221	-0.149495	13.6284	-58.2487	0	41.7513	-9.90228	0	7.09771	0	0	57038
1148	Lotte Shopping	0.190248	95	7	5.351613464510460E-02	Hanwha(0.154425); KOGAS(0.271409); S-Oil(0.427056)	-29.9608	0	7.03918	-49.3949	0	11.6051	-59.9216	0	14.0784	0	0	26687
1149	POSCO	1.29233	95	7	5.776505834946800E-01	Hanwha(1.303261); SK Holdings(0.142514)	2.92325	0	12.9233	77.1739	-272.51	68.6639	1.46163	0	6.46163	0	0	61504
1150	Samsung Electronics	1.524	95	5	-2.597594778170870E-01	Hanwha(4.790875); SK Holdings(0.362429)	15.196	0	44.196	83.316	-23.1682	219.148	6.812	0	19.812	0	0	208938
1151	SK Holdings	0.976432	95	11	1.205994805336040E-01	SK Holdings(1.000000)	-0.494931	0	20.5051	-4.97288	0	206.027	-0.589204	0	24.4108	0	0	106248
1152	S-Oil	1.08977	95	9	3.642234631269200E-01	S-Oil(1.000000)	0.807965	0	9.80796	0.269322	0	3.26932	0.987513	0	11.9875	0	0	27122
1153	GS Caltex	0.532044	96	5	-2.990669750465160E-02	KOGAS(0.200636); S-Oil(1.147787)	-11.2309	0	12.7691	-7.01934	0	7.98066	-23.3978	-6.0988	20.5034	0	0	38235
1154	Hanwha	0.217712	96	1	-3.930117873020090E-01	Hyundai Motor(0.336496); POSCO(0.114609)	-44.5904	-3.7779	8.63166	-175.233	0	48.7674	-13.2989	0	3.7011	0	0	35574
1155	Hyundai Motor	0.730746	96	9	2.047170282537480E-01	Hyundai Motor(1.000000)	-8.34687	0	22.6531	-24.2328	0	65.7672	-3.5003	0	9.4997	0	0	84771
1156	KEPCO	1.16664	96	9	3.713753359340610E-02	KEPCO(1.000000)	1.16647	0	8.16647	12.6646	0	88.6646	40.16	0	281.16	0	0	54252
1157	KIA Motor	0.46329	96	11	8.063117455402490E-01	KOGAS(0.057715); LG Electronics(0.161146); S-Oil(1.234968)	-17.1747	0	14.8253	-13.4177	0	11.5823	-20.9317	0	18.0683	0	0	44730
1158	KOGAS	1.03125	96	12	-1.018365628654060E-01	KOGAS(1.000000)	0.187517	0	6.18752	0.625056	0	20.6251	0.968837	0	31.9688	0	0	35411
1159	LG Electronics	0.388311	96	6	-7.177662072435660E-02	LG Electronics(1.000000)	-20.1857	0	12.8143	-61.1689	0	38.8311	-10.3987	0	6.60129	0	0	57038
1160	Lotte Shopping	0.189339	96	8	4.416737596607710E-01	KOGAS(0.268663); LG Electronics(0.122323); S-Oil(0.375943)	-29.9944	0	7.00556	-49.4503	0	11.5497	-59.9889	0	14.0111	0	0	26687
1161	POSCO	0.880364	96	6	1.024617886892730E-01	POSCO(1.000000)	-1.19636	0	8.80364	-31.5839	0	232.416	-0.598181	0	4.40182	0	0	61504
1162	Samsung Electronics	1.69772	96	5	5.810022571518380E-02	Hyundai Motor(1.479891); LG Electronics(0.808532); POSCO(0.607588)	20.2339	0	49.2339	110.938	0	269.938	9.07037	0	22.0704	0	0	208938
1163	SK Holdings	0.938072	96	11	2.163668144028180E-01	KOGAS(0.465324); LG Electronics(0.853923); POSCO(0.667670)	-1.30048	0	19.6995	-13.0667	0	197.933	-1.54819	0	23.4518	0	0	106248
1164	S-Oil	1.11593	96	6	4.279107818418340E-01	S-Oil(1.000000)	1.04334	0	10.0433	0.347781	0	3.34778	1.2752	0	12.2752	0	0	27122
1165	GS Caltex	0.591986	97	11	1.016974911845840E-01	KIA Motor(0.669516); S-Oil(0.305566)	-9.79234	0	14.2077	-6.12021	0	8.87979	-20.4007	-12.2665	17.3328	0	0	38235
1166	Hanwha	0.142306	97	1	-4.015792053077440E-01	Samsung Electronics(0.170261)	-48.8886	-2.71475	5.39666	-192.124	-2.28784	29.5886	-14.5808	0	2.4192	0	0	35574
1167	Hyundai Motor	0.709795	97	3	-1.385104644578380E-01	KIA Motor(0.250924); Samsung Electronics(0.352005)	-8.99635	-7.37904	14.6246	-26.1184	0	63.8816	-3.77266	0	9.22734	0	0	84771
1168	KEPCO	1.01231	97	4	1.845217537499410E-02	KEPCO(1.000000)	0.086192	0	7.08619	0.935796	0	76.9358	2.96746	0	243.967	0	0	54252
1169	KIA Motor	0.431818	97	9	5.558651006036850E-01	KIA Motor(1.000000)	-18.1818	0	13.8182	-14.2045	0	10.7955	-22.1591	0	16.8409	0	0	44730
1170	KOGAS	1.14655	97	7	1.471718399661910E-01	Lotte Shopping(0.580272); Samsung Electronics(0.095365)	0.87928	0	6.87928	2.93093	0	22.9309	4.54294	-26.4748	9.06814	0	0	35411
1171	LG Electronics	0.413964	97	11	1.179395171763610E-01	KIA Motor(0.228896); Samsung Electronics(0.223987)	-19.3392	-3.3983	10.2625	-58.6036	0	41.3964	-9.96261	0	7.03739	0	0	57038
1172	Lotte Shopping	0.179625	97	12	-1.423061990839030E-01	Lotte Shopping(1.000000)	-30.3539	0	6.64613	-50.0429	0	10.9571	-60.7077	0	13.2923	0	0	26687
1173	POSCO	0.932802	97	8	2.692288452110890E-01	KEPCO(0.002004); Samsung Electronics(0.293845)	-0.671981	0	9.32802	-17.7403	-195.04	51.2196	-0.335991	0	4.66401	0	0	61504
1174	Samsung Electronics	1.09298	97	10	3.415502974775380E-01	Samsung Electronics(1.000000)	2.69642	0	31.6964	14.7838	0	173.784	1.20874	0	14.2087	0	0	208938
1175	SK Holdings	0.764831	97	9	1.329103818155780E-01	KEPCO(0.049507); Samsung Electronics(0.495660)	-4.93855	0	16.0615	-49.6206	-71.4329	89.9465	-5.87922	0	19.1208	0	0	106248
1176	S-Oil	1.80218	97	1	6.045785535174070E-01	S-Oil(1.000000)	7.21962	0	16.2196	2.40654	0	5.40654	8.82397	0	19.824	0	0	27122
1177	GS Caltex	0.530334	98	3	-5.938684376421220E-01	KOGAS(0.171488); S-Oil(1.185843)	-11.272	0	12.728	-7.04498	0	7.95502	-23.4833	-6.0792	20.4375	0	0	38235
1178	Hanwha	0.131628	98	10	1.874414116391020E-02	Hanwha(1.000000)	-49.4972	0	7.50279	-194.515	0	29.4846	-14.7623	0	2.23767	0	0	35574
1179	Hyundai Motor	0.697319	98	7	-1.677291810370460E-01	Hanwha(0.578017); LG Electronics(1.125717)	-9.38312	-2.19384	19.423	-27.2413	0	62.7587	-3.93486	0	9.06514	0	0	84771
1180	KEPCO	1.17656	98	5	1.607503361384890E-01	POSCO(0.046151); SK Holdings(0.483901)	1.23591	0	8.23591	13.4185	0	89.4185	42.5507	-274.028	9.52314	0	0	54252
1181	KIA Motor	0.452802	98	3	1.811641949329890E-01	KOGAS(0.029169); Samsung Electronics(0.033091); S-Oil(1.356212)	-17.5104	0	14.4896	-13.68	0	11.32	-21.3407	0	17.6593	0	0	44730
1182	KOGAS	1.20265	98	9	-9.979341170658410E-02	KOGAS(1.000000)	1.21592	0	7.21592	4.05307	0	24.0531	6.28226	0	37.2823	0	0	35411
1183	LG Electronics	0.406106	98	9	4.307962396568340E-01	LG Electronics(1.000000)	-19.5985	0	13.4015	-59.3894	0	40.6106	-10.0962	0	6.90381	0	0	57038
1184	Lotte Shopping	0.195977	98	5	2.677811126361650E-01	KOGAS(0.223016); Samsung Electronics(0.026601); S-Oil(0.487861)	-29.7488	0	7.25116	-49.0454	0	11.9546	-59.4977	0	14.5023	0	0	26687
1185	POSCO	0.883438	98	4	1.205381311860470E-01	POSCO(1.000000)	-1.16562	0	8.83438	-30.7724	0	233.228	-0.58281	0	4.41719	0	0	61504
1186	Samsung Electronics	1.1856	98	9	-3.770108259516930E-02	Samsung Electronics(1.000000)	5.38244	0	34.3824	29.5106	0	188.511	2.41282	0	15.4128	0	0	208938
1187	SK Holdings	0.770346	98	9	3.082085186975520E-01	SK Holdings(1.000000)	-4.82273	0	16.1773	-48.457	0	162.543	-5.74135	0	19.2587	0	0	106248
1188	S-Oil	1.07664	98	6	-2.861399390628450E-01	S-Oil(1.000000)	0.689803	0	9.6898	0.229934	0	3.22993	0.843092	0	11.8431	0	0	27122
1189	GS Caltex	0.521221	99	4	2.755514957911620E-01	GS Caltex(1.000000)	-11.4907	0	12.5093	-7.18168	0	7.81832	-23.9389	0	26.0611	0	0	38235
1190	Hanwha	0.14459	99	5	9.421692419781880E-02	Samsung Electronics(0.170261)	-48.7583	-2.75834	5.48331	-191.612	-2.32457	30.0637	-14.542	0	2.45804	0	0	35574
1191	Hyundai Motor	0.724961	99	5	3.085252551868600E-01	KIA Motor(0.242331); Samsung Electronics(0.353844)	-8.52622	-7.5367	14.9371	-24.7536	0	65.2464	-3.57551	0	9.42449	0	0	84771
1192	KEPCO	1.07453	99	12	2.629722777174750E-01	KEPCO(1.000000)	0.521679	0	7.52168	5.66395	0	81.6639	17.9607	0	258.961	0	0	54252
1193	KIA Motor	0.456684	99	10	3.796037058240130E-01	KIA Motor(1.000000)	-17.3861	0	14.6139	-13.5829	0	11.4171	-21.1893	0	17.8107	0	0	44730
1194	KOGAS	1.18761	99	1	-4.807617415220890E-01	GS Caltex(0.252046); Samsung Electronics(0.123357)	1.12568	0	7.12568	3.75228	0	23.7523	5.81603	-28.4666	8.34948	0	0	35411
1195	LG Electronics	0.423597	99	8	1.146994209622620E-01	KIA Motor(0.221469); Samsung Electronics(0.225577)	-19.0213	-3.47737	10.5013	-57.6403	0	42.3597	-9.79886	0	7.20114	0	0	57038
1196	Lotte Shopping	0.190835	99	2	-2.701625921597470E-01	GS Caltex(0.445507); Samsung Electronics(0.046200)	-29.9391	0	7.06089	-49.3591	0	11.6409	-59.8782	-1.8444	12.2774	0	0	26687
1197	POSCO	0.942233	99	8	2.331280845088480E-01	Samsung Electronics(0.272181); SK Holdings(0.043625)	-0.577673	0	9.42233	-15.2506	-194.092	54.6578	-0.288836	0	4.71116	0	0	61504
1198	Samsung Electronics	1.11053	99	9	2.759674780598540E-01	Samsung Electronics(1.000000)	3.20533	0	32.2053	17.5741	0	176.574	1.43687	0	14.4369	0	0	208938
1199	SK Holdings	0.71677	99	12	-5.264461142066350E-02	SK Holdings(1.000000)	-5.94784	0	15.0522	-59.7616	0	151.238	-7.08076	0	17.9192	0	0	106248
1200	S-Oil	1.20945	99	11	8.094472727493010E-01	S-Oil(1.000000)	1.88509	0	10.8851	0.628362	0	3.62836	2.30399	0	13.304	0	0	27122
1201	GS Caltex	0.549812	100	6	-4.979318084285020E-01	GS Caltex(1.000000)	-10.8045	0	13.1955	-6.75283	0	8.24717	-22.5094	0	27.4906	0	0	38235
1202	Hanwha	0.13951	100	12	-2.599388137915610E-01	Hanwha(1.000000)	-49.0479	0	7.95209	-192.75	0	31.2503	-14.6283	0	2.37168	0	0	35574
1203	Hyundai Motor	0.674657	100	10	-1.264381762415410E-01	Hyundai Motor(1.000000)	-10.0856	0	20.9144	-29.2809	0	60.7191	-4.22946	0	8.77054	0	0	84771
1204	KEPCO	1.26625	100	5	-8.266744794786990E-02	KOGAS(0.973884); POSCO(0.321374)	1.86373	0	8.86373	20.2347	0	96.2347	64.1654	-272.861	32.3039	0	0	54252
1205	KIA Motor	0.629717	100	3	3.365392883734710E-02	KIA Motor(1.000000)	-11.849	0	20.151	-9.25707	0	15.7429	-14.441	0	24.559	0	0	44730
1206	KOGAS	1.02213	100	12	-6.010583899998000E-02	KOGAS(1.000000)	0.13275	0	6.13275	0.442501	0	20.4425	0.685877	0	31.6859	0	0	35411
1207	LG Electronics	0.41731	100	2	5.503874834724050E-01	Hanwha(0.378028); Hyundai Motor(0.463805); Lotte Shopping(0.160109)	-19.2288	0	13.7712	-58.269	0	41.731	-9.90572	0	7.09428	0	0	57038
1208	Lotte Shopping	0.179768	100	4	1.453096238092860E-01	Lotte Shopping(1.000000)	-30.3486	0	6.65141	-50.0342	0	10.9658	-60.6972	0	13.3028	0	0	26687
1209	POSCO	0.899618	100	6	1.910665730710630E-01	POSCO(1.000000)	-1.00382	0	8.99618	-26.5009	0	237.499	-0.501912	0	4.49809	0	0	61504
1210	Samsung Electronics	1.53926	100	8	6.086151149152550E-01	Hanwha(4.561530); POSCO(0.123353); SK Holdings(0.367813)	15.6385	0	44.6385	85.7422	0	244.742	7.01037	0	20.0104	0	0	208938
1211	SK Holdings	0.939286	100	11	2.888166772680240E-01	SK Holdings(1.000000)	-1.27499	0	19.725	-12.8106	0	198.189	-1.51785	0	23.4822	0	0	106248
1212	S-Oil	1.95004	100	8	1.605343059283320E-01	GS Caltex(0.709350)	8.5504	-8.19019	9.36021	2.85013	0	5.85013	10.4505	-1.95004	19.5004	0	0	27122
1213	GS Caltex	0.503463	101	4	-1.499917358340340E-01	GS Caltex(1.000000)	-11.9169	0	12.0831	-7.44805	0	7.55195	-24.8268	0	25.1732	0	0	38235
1214	Hanwha	0.139925	101	6	-2.830808240009550E-01	Hanwha(1.000000)	-49.0243	0	7.9757	-192.657	0	31.3431	-14.6213	0	2.37872	0	0	35574
1215	Hyundai Motor	0.739654	101	8	4.400155996108650E-01	Hanwha(2.025773); KIA Motor(0.284063)	-8.07072	-2.83651	20.0928	-23.4311	0	66.5689	-3.3845	0	9.6155	0	0	84771
1216	KEPCO	1.02771	101	10	-9.456291107196720E-02	KEPCO(1.000000)	0.193968	0	7.19397	2.10594	0	78.1059	6.67804	0	247.678	0	0	54252
1217	KIA Motor	0.432981	101	4	1.796745918674450E-01	KIA Motor(1.000000)	-18.1446	0	13.8554	-14.1755	0	10.8245	-22.1138	0	16.8862	0	0	44730
1218	KOGAS	1.12786	101	9	1.813241941081510E-01	KOGAS(1.000000)	0.767152	0	6.76715	2.55717	0	22.5572	3.96362	0	34.9636	0	0	35411
1219	LG Electronics	0.430461	101	11	-2.642271667481530E-01	Hanwha(1.286297); KIA Motor(0.252164)	-18.7948	-0.452266	13.7529	-56.9539	0	43.0461	-9.68217	0	7.31783	0	0	57038
1220	Lotte Shopping	0.182129	101	6	-2.113106696055300E-01	Lotte Shopping(1.000000)	-30.2612	0	6.73877	-49.8901	0	11.1099	-60.5225	0	13.4775	0	0	26687
1221	POSCO	0.863792	101	6	2.756945848995580E-02	POSCO(1.000000)	-1.36208	0	8.63792	-35.959	0	228.041	-0.681041	0	4.31896	0	0	61504
1222	Samsung Electronics	1.54355	101	1	-4.835933353057150E-01	Hanwha(5.063650); KOGAS(0.184698); POSCO(0.361983)	15.7628	0	44.7628	86.4237	0	245.424	7.06609	0	20.0661	0	0	208938
1223	SK Holdings	0.949354	101	8	-4.771798995683690E-01	Hanwha(1.378254); KOGAS(0.506124); POSCO(0.638912)	-1.06357	0	19.9364	-10.6864	0	200.314	-1.26616	0	23.7338	0	0	106248
1224	S-Oil	1.10344	101	12	3.905127660379150E-01	S-Oil(1.000000)	0.930962	0	9.93096	0.310321	0	3.31032	1.13784	0	12.1378	0	0	27122
1225	GS Caltex	0.539915	102	6	-4.282695293547400E-01	GS Caltex(1.000000)	-11.042	0	12.958	-6.90128	0	8.09872	-23.0042	0	26.9958	0	0	38235
1226	Hanwha	0.150764	102	12	-5.704502300843070E-01	Hanwha(1.000000)	-48.4064	0	8.59356	-190.229	0	33.7712	-14.437	0	2.56299	0	0	35574
1227	Hyundai Motor	0.695654	102	12	3.449087553231150E-01	Hanwha(0.503446); LG Electronics(1.172226)	-9.43472	-2.1886	19.3767	-27.3911	0	62.6089	-3.9565	0	9.0435	0	0	84771
1228	KEPCO	1.18224	102	9	-1.976926086812850E-02	KEPCO(1.000000)	1.27571	0	8.27571	13.8506	0	89.8506	43.921	0	284.921	0	0	54252
1229	KIA Motor	0.617743	102	5	3.827621955786820E-01	GS Caltex(0.837917); LG Electronics(0.222522)	-12.2322	-6.0531	13.7147	-9.55642	0	15.4436	-14.908	0	24.092	0	0	44730
1230	KOGAS	1.05142	102	6	-1.826764555450590E-01	KOGAS(1.000000)	0.308493	0	6.30849	1.02831	0	21.0283	1.59388	0	32.5939	0	0	35411
1231	LG Electronics	0.389063	102	6	-7.856585258153150E-02	LG Electronics(1.000000)	-20.1609	0	12.8391	-61.0937	0	38.9063	-10.3859	0	6.61406	0	0	57038
1232	Lotte Shopping	0.194729	102	11	-2.175276076179160E-01	GS Caltex(0.327831); KOGAS(0.137563); LG Electronics(0.162719)	-29.795	0	7.20499	-49.1215	0	11.8785	-59.59	0	14.41	0	0	26687
1233	POSCO	1.31108	102	11	-3.165100156720270E-01	POSCO(1.000000)	3.11085	0	13.1108	82.1263	0	346.126	1.55542	0	6.55542	0	0	61504
1234	Samsung Electronics	1.64706	102	5	2.358017429875420E-01	Hanwha(1.677453); LG Electronics(2.250308); POSCO(0.339998)	18.7648	0	47.7648	102.883	0	261.883	8.4118	0	21.4118	0	0	208938
1235	SK Holdings	1.07928	102	8	-4.955106870211370E-02	KOGAS(0.525100); LG Electronics(0.980563); POSCO(0.515809)	1.6648	0	22.6648	16.7272	0	227.727	1.9819	0	26.9819	0	0	106248
1236	S-Oil	1.91494	102	8	-6.075775066304800E-01	GS Caltex(0.709350)	8.23449	-8.04276	9.19173	2.74483	0	5.74483	10.0644	-1.91494	19.1494	0	0	27122
1237	GS Caltex	0.543901	103	2	-1.494565995237860E-01	KIA Motor(0.638779); S-Oil(0.356257)	-10.9464	0	13.0536	-6.84148	0	8.15852	-22.8049	-11.2701	15.9249	0	0	38235
1238	Hanwha	0.135681	103	12	-1.536281856104240E-01	Hanwha(1.000000)	-49.2662	0	7.73383	-193.607	0	30.3926	-14.6934	0	2.30658	0	0	35574
1239	Hyundai Motor	0.709125	103	8	-2.848809050918450E-01	KIA Motor(0.260324); Samsung Electronics(0.349992)	-9.01712	-7.37208	14.6108	-26.1787	0	63.8213	-3.78137	0	9.21863	0	0	84771
1240	KEPCO	1.05037	103	10	1.870838002709840E-01	KEPCO(1.000000)	0.352556	0	7.35256	3.82775	0	79.8277	12.138	0	253.138	0	0	54252
1241	KIA Motor	0.415834	103	10	-4.884412784469310E-03	KIA Motor(1.000000)	-18.6933	0	13.3067	-14.6042	0	10.3958	-22.7825	0	16.2175	0	0	44730
1242	KOGAS	1.1577	103	4	-5.945670712968330E-01	KIA Motor(0.238651); Samsung Electronics(0.118390)	0.946198	0	6.9462	3.154	0	23.154	4.88869	-30.3281	5.56057	0	0	35411
1243	LG Electronics	0.412734	103	7	2.671612308295270E-01	KIA Motor(0.236988); Samsung Electronics(0.222255)	-19.3798	-3.3882	10.232	-58.7266	0	41.2734	-9.98352	0	7.01648	0	0	57038
1244	Lotte Shopping	0.182524	103	6	2.843357605012760E-01	KIA Motor(0.413885); Samsung Electronics(0.039121)	-30.2466	0	6.75339	-49.866	0	11.134	-60.4932	-6.23607	7.27072	0	0	26687
1245	POSCO	0.937332	103	12	-6.838525403823710E-01	KEPCO(0.001941); Samsung Electronics(0.293861)	-0.626681	0	9.37332	-16.5444	-195.987	51.4683	-0.31334	0	4.68666	0	0	61504
1246	Samsung Electronics	1.09823	103	12	3.709574787949710E-01	Samsung Electronics(1.000000)	2.84857	0	31.8486	15.618	0	174.618	1.27694	0	14.2769	0	0	208938
1247	SK Holdings	0.769117	103	12	4.272764507675390E-01	KEPCO(0.047981); Samsung Electronics(0.496056)	-4.84854	0	16.1515	-48.7163	-71.8332	90.4505	-5.77208	0	19.2279	0	0	106248
1248	S-Oil	1.4202	103	3	3.469238152933630E-01	S-Oil(1.000000)	3.78176	0	12.7818	1.26059	0	4.26059	4.62215	0	15.6221	0	0	27122
1249	GS Caltex	0.60387	104	7	4.271862097095950E-01	KIA Motor(0.854795)	-9.50712	-2.89858	11.5943	-5.94195	0	9.05805	-19.8065	-16.0629	14.1306	0	0	38235
1250	Hanwha	0.191856	104	5	-3.237114485190880E-01	POSCO(0.015012); Samsung Electronics(0.165842)	-46.0642	-3.67757	7.25823	-181.024	0	42.9758	-13.7384	0	3.26155	0	0	35574
1251	Hyundai Motor	0.913899	104	8	-4.307137267154660E-01	KIA Motor(0.329137); Samsung Electronics(0.335261)	-2.66913	-9.50091	18.83	-7.74909	0	82.2509	-1.11931	0	11.8807	0	0	84771
1252	KEPCO	1.24189	104	10	-8.116770554781380E-01	KEPCO(1.000000)	1.69322	0	8.69322	18.3836	0	94.3836	58.2953	0	299.295	0	0	54252
1253	KIA Motor	0.42387	104	6	-6.224234688233940E-02	KIA Motor(1.000000)	-18.4362	0	13.5638	-14.4033	0	10.5967	-22.4691	0	16.5309	0	0	44730
1254	KOGAS	1.32032	104	3	5.409307497406310E-01	KEPCO(0.096999); Lotte Shopping(0.863745); Samsung Electronics(0.033971)	1.92193	0	7.92192	6.40642	0	26.4064	9.92995	0	40.9299	0	0	35411
1255	LG Electronics	0.524132	104	8	-1.256337652771170E-01	KIA Motor(0.295246); Samsung Electronics(0.209783)	-15.7037	-4.30268	12.9937	-47.5868	0	52.4132	-8.08976	0	8.91024	0	0	57038
1256	Lotte Shopping	0.175949	104	10	-3.736850976447630E-02	Lotte Shopping(1.000000)	-30.4899	0	6.5101	-50.2671	0	10.7329	-60.9798	0	13.0202	0	0	26687
1257	POSCO	1.0129	104	9	-1.571505128048800E-02	POSCO(1.000000)	0.129002	0	10.129	3.40565	0	267.406	0.064501	0	5.0645	0	0	61504
1258	Samsung Electronics	1.47755	104	3	2.006838956890550E-01	Samsung Electronics(1.000000)	13.849	0	42.849	75.931	0	234.931	6.20819	0	19.2082	0	0	208938
1259	SK Holdings	0.980531	104	2	1.363530522724180E-01	KEPCO(0.050969); POSCO(0.432407); Samsung Electronics(0.367995)	-0.408845	0	20.5912	-4.10792	0	206.892	-0.48672	0	24.5133	0	0	106248
1260	S-Oil	2.14178	104	8	-9.292330939216780E-01	KIA Motor(0.606349)	10.276	-11.0516	8.22442	3.42533	0	6.42533	12.5595	-13.536	10.0235	0	0	27122
1261	GS Caltex	0.499599	105	5	-2.336015743115470E-01	KIA Motor(0.583145); S-Oil(0.448010)	-12.0096	0	11.9904	-7.50601	0	7.49399	-25.0201	-10.3522	14.6278	0	0	38235
1262	Hanwha	0.299647	105	7	2.272987241595420E-01	Hyundai Motor(0.419648)	-39.9201	-4.93264	12.1472	-156.879	-31.8547	35.2661	-11.906	0	5.09399	0	0	35574
1263	Hyundai Motor	0.933748	105	11	-1.294794942812990E-02	Hyundai Motor(1.000000)	-2.05382	0	28.9462	-5.96271	0	84.0373	-0.86128	0	12.1387	0	0	84771
1264	KEPCO	1.10201	105	7	1.817172222883530E-02	SK Holdings(0.510617)	0.714055	0	7.71406	7.7526	-6.24471	77.5079	24.5839	-256.401	9.1834	0	0	54252
1265	KIA Motor	0.418404	105	4	1.007002584727550E-02	KIA Motor(1.000000)	-18.6111	0	13.3889	-14.5399	0	10.4601	-22.6822	0	16.3178	0	0	44730
1266	KOGAS	1.25589	105	1	1.091198331780520E-01	Lotte Shopping(0.928584); SK Holdings(0.100048)	1.53534	0	7.53534	5.11781	0	25.1178	7.93261	-25.0855	13.8471	0	0	35411
1267	LG Electronics	0.5519	105	7	-2.924717791556130E-01	Hyundai Motor(0.552868); KIA Motor(0.108567); SK Holdings(0.050021)	-14.7873	0	18.2127	-44.81	0	55.19	-7.6177	0	9.3823	0	0	57038
1268	Lotte Shopping	0.175329	105	12	-2.626159734207450E-02	Lotte Shopping(1.000000)	-30.5128	0	6.48718	-50.3049	0	10.6951	-61.0256	0	12.9744	0	0	26687
1269	POSCO	1.83167	105	8	-9.736249375458920E-02	Hyundai Motor(0.566607); SK Holdings(0.126799)	8.31671	0	18.3167	219.561	-416.698	66.8633	4.15836	0	9.15836	0	0	61504
1270	Samsung Electronics	2.33731	105	2	2.393923101623190E-01	Hyundai Motor(2.253828); SK Holdings(0.168274)	38.7819	0	67.7819	212.632	-156.683	214.948	17.385	0	30.385	0	0	208938
1271	SK Holdings	0.719397	105	4	6.560312501132200E-02	SK Holdings(1.000000)	-5.89267	0	15.1073	-59.2073	0	151.793	-7.01508	0	17.9849	0	0	106248
1272	S-Oil	1.03735	105	10	-1.123023697125930E-01	S-Oil(1.000000)	0.336158	0	9.33616	0.112053	0	3.11205	0.41086	0	11.4109	0	0	27122
1273	GS Caltex	0.494712	106	4	6.113026353852440E-02	GS Caltex(1.000000)	-12.1269	0	11.8731	-7.57931	0	7.42069	-25.2644	0	24.7356	0	0	38235
1274	Hanwha	0.224618	106	1	4.949254842236860E-01	POSCO(0.020635); Samsung Electronics(0.164187)	-44.1968	-4.30555	8.49765	-173.686	0	50.3143	-13.1815	0	3.8185	0	0	35574
1275	Hyundai Motor	0.786879	106	7	-6.817351161739080E-03	LG Electronics(1.215784); Samsung Electronics(0.073826)	-6.60676	-4.05049	20.3427	-19.1809	0	70.8191	-2.77058	0	10.2294	0	0	84771
1276	KEPCO	1.26901	106	2	-1.555208919457590E-01	KOGAS(0.948741); POSCO(0.335850)	1.88306	0	8.88306	20.4446	0	96.4446	64.8309	-273.457	32.3744	0	0	54252
1277	KIA Motor	0.534335	106	7	-4.853456296381960E-01	GS Caltex(0.175042); LG Electronics(0.191503); S-Oil(0.999717)	-14.9013	0	17.0987	-11.6416	0	13.3584	-18.1609	0	20.8391	0	0	44730
1278	KOGAS	1.0515	106	6	1.785659916224560E-01	KOGAS(1.000000)	0.309006	0	6.30901	1.03002	0	21.03	1.59653	0	32.5965	0	0	35411
1279	LG Electronics	0.413796	106	10	-3.322681416797800E-01	LG Electronics(1.000000)	-19.3447	0	13.6553	-58.6204	0	41.3796	-9.96547	0	7.03453	0	0	57038
1280	Lotte Shopping	0.190516	106	11	6.780357010844030E-04	GS Caltex(0.350045); KOGAS(0.134576); LG Electronics(0.149683)	-29.9509	0	7.0491	-49.3785	0	11.6215	-59.9018	0	14.0982	0	0	26687
1281	POSCO	0.862719	106	4	-8.560339521564010E-03	POSCO(1.000000)	-1.37281	0	8.62719	-36.2422	0	227.758	-0.686405	0	4.3136	0	0	61504
1282	Samsung Electronics	1.7473	106	11	-8.077771634271060E-01	Samsung Electronics(1.000000)	21.6717	0	50.6717	118.821	0	277.821	9.71491	0	22.7149	0	0	208938
1283	SK Holdings	0.960465	106	1	2.036619225878260E-01	KOGAS(0.467257); LG Electronics(0.820461); POSCO(0.697589)	-0.830235	0	20.1698	-8.34188	0	202.658	-0.988375	0	24.0116	0	0	106248
1284	S-Oil	1.37877	106	11	1.591995069614080E-01	S-Oil(1.000000)	3.40893	0	12.4089	1.13631	0	4.13631	4.16647	0	15.1665	0	0	27122
1285	GS Caltex	0.546588	107	9	1.830618908816830E-01	GS Caltex(1.000000)	-10.8819	0	13.1181	-6.80117	0	8.19883	-22.6706	0	27.3294	0	0	38235
1286	Hanwha	0.199551	107	2	4.127152723379390E-02	Samsung Electronics(0.170261)	-45.6256	-3.80682	7.56759	-179.301	-3.20817	41.4913	-13.6076	0	3.39237	0	0	35574
1287	Hyundai Motor	0.73114	107	6	4.573003235689330E-01	Hyundai Motor(1.000000)	-8.33466	0	22.6653	-24.1974	0	65.8026	-3.49518	0	9.50482	0	0	84771
1288	KEPCO	1.12813	107	9	1.917649873014780E-01	KEPCO(1.000000)	0.89692	0	7.89692	9.73799	0	85.738	30.8797	0	271.88	0	0	54252
1289	KIA Motor	0.431067	107	10	-1.510468452066790E-01	KIA Motor(1.000000)	-18.2059	0	13.7941	-14.2233	0	10.7767	-22.1884	0	16.8116	0	0	44730
1290	KOGAS	1.32494	107	3	-6.148415561741920E-02	KEPCO(0.038975); LG Electronics(0.583760)	1.94965	0	7.94965	6.49884	0	26.4988	10.0732	-26.5399	14.5333	0	0	35411
1291	LG Electronics	0.39669	107	4	-1.608591299931990E-01	LG Electronics(1.000000)	-19.9092	0	13.0908	-60.331	0	39.669	-10.2563	0	6.74373	0	0	57038
1292	Lotte Shopping	0.196398	107	12	-6.156470869529900E-01	KIA Motor(0.323627); LG Electronics(0.214088)	-29.7333	0	7.26673	-49.0197	0	11.9803	-59.4665	-7.64903	6.88444	0	0	26687
1293	POSCO	1.30745	107	11	-5.378592334561390E-01	KEPCO(0.002520); Samsung Electronics(0.293710)	3.07445	0	13.0745	81.1656	-273.375	71.791	1.53723	0	6.53723	0	0	61504
1294	Samsung Electronics	1.53266	107	3	9.063387766158540E-03	Samsung Electronics(1.000000)	15.447	0	44.447	84.6923	0	243.692	6.92452	0	19.9245	0	0	208938
1295	SK Holdings	1.06554	107	7	4.645998441524970E-01	KEPCO(0.061891); Samsung Electronics(0.492444)	1.37642	0	22.3764	13.8297	-99.5185	125.311	1.6386	0	26.6386	0	0	106248
1296	S-Oil	1.93861	107	2	-4.433617578608360E-01	GS Caltex(0.709350)	8.44752	-8.14217	9.30534	2.81584	0	5.81584	10.3247	-1.93861	19.3861	0	0	27122
1297	GS Caltex	0.49928	108	10	-1.019651450265010E-01	GS Caltex(1.000000)	-12.0173	0	11.9827	-7.5108	0	7.4892	-25.036	0	24.964	0	0	38235
1298	Hanwha	0.224524	108	3	-5.440768217536380E-01	Hyundai Motor(0.419648)	-44.2021	-3.69601	9.10185	-173.707	-23.8686	26.4247	-13.1831	0	3.81691	0	0	35574
1299	Hyundai Motor	0.699653	108	10	2.775059509499880E-01	Hyundai Motor(1.000000)	-9.31075	0	21.6892	-27.0312	0	62.9688	-3.90451	0	9.09549	0	0	84771
1300	KEPCO	1.7341	108	7	5.757506196639660E-01	KOGAS(1.532066)	5.1387	0	12.1387	55.7916	-91.3293	40.4623	176.918	-355.201	62.7166	0	0	54252
1301	KIA Motor	0.485077	108	12	6.212868840890150E-01	KIA Motor(1.000000)	-16.4776	0	15.5224	-12.8731	0	12.1269	-20.082	0	18.918	0	0	44730
1302	KOGAS	1.32052	108	9	-4.758045608431490E-01	KOGAS(1.000000)	1.92309	0	7.92309	6.4103	0	26.4103	9.93597	0	40.936	0	0	35411
1303	LG Electronics	0.440325	108	8	-7.241790140559680E-02	Hyundai Motor(0.647041); KOGAS(0.032022); SK Holdings(0.009918)	-18.4693	0	14.5307	-55.9675	0	44.0325	-9.51447	0	7.48553	0	0	57038
1304	Lotte Shopping	0.187124	108	6	3.109376176340700E-01	Lotte Shopping(1.000000)	-30.0764	0	6.92358	-49.5854	0	11.4146	-60.1528	0	13.8472	0	0	26687
1305	POSCO	1.54452	108	5	-2.351968052377130E-01	Samsung Electronics(0.272042); SK Holdings(0.043898)	5.44524	0	15.4452	143.754	-318.158	89.596	2.72262	0	7.72262	0	0	61504
1306	Samsung Electronics	1.82133	108	1	5.549113910305660E-01	Samsung Electronics(1.000000)	23.8185	0	52.8185	130.591	0	289.591	10.6773	0	23.6773	0	0	208938
1307	SK Holdings	1.16761	108	3	-3.418373203958640E-01	SK Holdings(1.000000)	3.51986	0	24.5199	35.3662	0	246.366	4.19031	0	29.1903	0	0	106248
1308	S-Oil	1.77082	108	1	-5.822846144917950E-02	GS Caltex(0.709350)	6.9374	-7.43745	8.49995	2.31247	0	5.31247	8.47904	-1.77082	17.7082	0	0	27122
1309	GS Caltex	0.507387	109	4	1.713746080612920E-01	GS Caltex(1.000000)	-11.8227	0	12.1773	-7.38919	0	7.61081	-24.6306	0	25.3694	0	0	38235
1310	Hanwha	0.221471	109	2	4.803148578204300E-01	LG Electronics(0.481888); POSCO(0.131505)	-44.3762	-5.28087	7.34298	-174.39	0	49.6095	-13.235	0	3.76501	0	0	35574
1311	Hyundai Motor	0.744472	109	7	3.515218335278380E-01	LG Electronics(1.434212); POSCO(0.048231)	-7.92136	-4.27904	18.7996	-22.9975	0	67.0025	-3.32186	0	9.67814	0	0	84771
1312	KEPCO	1.21303	109	2	3.185208934197460E-02	POSCO(0.047220); SK Holdings(0.483282)	1.49121	0	8.49122	16.1903	0	92.1903	51.3404	-282.522	9.81834	0	0	54252
1313	KIA Motor	0.475839	109	11	1.611406897912840E-01	GS Caltex(0.151985); LG Electronics(0.181811); S-Oil(1.052604)	-16.7732	0	15.2268	-13.104	0	11.896	-20.4423	0	18.5577	0	0	44730
1314	KOGAS	1.01327	109	6	2.156854101237260E-02	KOGAS(1.000000)	0.07961	0	6.07961	0.265365	0	20.2654	0.411316	0	31.4113	0	0	35411
1315	LG Electronics	0.388139	109	6	-6.586927438663070E-02	LG Electronics(1.000000)	-20.1914	0	12.8086	-61.1861	0	38.8139	-10.4016	0	6.59837	0	0	57038
1316	Lotte Shopping	0.187635	109	11	5.272599239274760E-02	GS Caltex(0.336138); KOGAS(0.137541); LG Electronics(0.157163)	-30.0575	0	6.94249	-49.5543	0	11.4457	-60.115	0	13.885	0	0	26687
1317	POSCO	0.890206	109	6	1.459731265198270E-01	POSCO(1.000000)	-1.09794	0	8.90206	-28.9856	0	235.014	-0.548969	0	4.45103	0	0	61504
1318	Samsung Electronics	1.72	109	2	-4.082370099033970E-01	LG Electronics(2.930180); POSCO(0.679734)	20.8799	-6.2973	43.5826	114.479	0	273.479	9.35994	0	22.3599	0	0	208938
1319	SK Holdings	0.795243	109	6	-4.883075987071390E-01	SK Holdings(1.000000)	-4.29991	0	16.7001	-43.2038	0	167.796	-5.11894	0	19.8811	0	0	106248
1320	S-Oil	1.16614	109	12	5.949076749676050E-01	S-Oil(1.000000)	1.49524	0	10.4952	0.498412	0	3.49841	1.82751	0	12.8275	0	0	27122
1321	GS Caltex	0.546528	110	1	3.179078297026140E-01	SK Holdings(0.022968); S-Oil(1.319767)	-10.8833	0	13.1167	-6.80209	0	8.19791	-22.6736	-11.3074	16.019	0	0	38235
1322	Hanwha	0.225577	110	2	-1.311136463799310E-01	Hyundai Motor(0.332396); POSCO(0.120260)	-44.1421	-3.91439	8.94351	-173.471	0	50.5293	-13.1652	0	3.83481	0	0	35574
1323	Hyundai Motor	0.766486	110	10	-6.176639705850420E-01	Hyundai Motor(1.000000)	-7.23894	0	23.7611	-21.0163	0	68.9837	-3.03568	0	9.96431	0	0	84771
1324	KEPCO	1.24205	110	2	2.605313809028770E-01	POSCO(0.049512); SK Holdings(0.481956)	1.69434	0	8.69434	18.3957	0	94.3957	58.3337	-289.28	10.0532	0	0	54252
1325	KIA Motor	0.470794	110	2	6.529761100815810E-02	Hyundai Motor(0.001603); SK Holdings(0.039925); S-Oil(1.487803)	-16.9346	0	15.0654	-13.2301	0	11.7699	-20.639	0	18.361	0	0	44730
1326	KOGAS	1.5297	110	8	2.334763403883920E-01	SK Holdings(0.165306); S-Oil(0.658049)	3.17818	0	9.17818	10.5939	0	30.5939	16.4206	-36.2928	11.1278	0	0	35411
1327	LG Electronics	0.476289	110	8	7.400208217935260E-01	Hyundai Motor(0.581375); SK Holdings(0.041358); S-Oil(0.123884)	-17.2825	0	15.7175	-52.3711	0	47.6289	-8.90309	0	8.09691	0	0	57038
1328	Lotte Shopping	0.220472	110	11	-3.074818424345950E-01	SK Holdings(0.064416); S-Oil(0.731617)	-28.8425	0	8.15747	-47.5512	0	13.4488	-57.6851	-6.37976	9.93517	0	0	26687
1329	POSCO	0.869311	110	9	7.123454407843590E-01	POSCO(1.000000)	-1.30689	0	8.69311	-34.5018	0	229.498	-0.653444	0	4.34656	0	0	61504
1330	Samsung Electronics	1.80359	110	1	-2.199820331387110E-01	Hyundai Motor(1.918413); POSCO(0.611357); SK Holdings(0.081990)	23.304	0	52.304	127.77	0	286.77	10.4466	0	23.4466	0	0	208938
1331	SK Holdings	0.816507	110	9	7.241481017756920E-02	SK Holdings(1.000000)	-3.85335	0	17.1467	-38.717	0	172.283	-4.58732	0	20.4127	0	0	106248
1332	S-Oil	1.07114	110	10	2.382179841776570E-01	S-Oil(1.000000)	0.640218	0	9.64022	0.213406	0	3.21341	0.782489	0	11.7825	0	0	27122
1333	GS Caltex	0.503403	111	4	-1.136105191906100E-01	GS Caltex(1.000000)	-11.9183	0	12.0817	-7.44895	0	7.55105	-24.8298	0	25.1702	0	0	38235
1334	Hanwha	0.189737	111	11	-5.597806434417890E-02	Hanwha(1.000000)	-46.185	0	10.815	-181.499	0	42.5012	-13.7745	0	3.22553	0	0	35574
1335	Hyundai Motor	0.828176	111	8	4.266478552405260E-01	LG Electronics(1.146318); Samsung Electronics(0.092790)	-5.32656	-4.26307	21.4104	-15.4642	0	74.5358	-2.23372	0	10.7663	0	0	84771
1336	KEPCO	1.57395	111	2	-7.422621975997670E-02	Samsung Electronics(0.259656)	4.01765	0	11.0177	43.6202	-59.2131	60.4071	138.322	-374.383	4.93895	0	0	54252
1337	KIA Motor	0.613326	111	1	1.609991432573900E-01	GS Caltex(0.892265); LG Electronics(0.186091)	-12.3736	-6.00982	13.6166	-9.66685	0	15.3331	-15.0803	0	23.9197	0	0	44730
1338	KOGAS	1.42363	111	8	-1.329265289228230E-01	GS Caltex(0.312830); Samsung Electronics(0.112234)	2.54179	0	8.54179	8.47264	0	28.4726	13.1326	-34.1238	10.0088	0	0	35411
1339	LG Electronics	0.461904	111	11	7.954269807259510E-01	LG Electronics(1.000000)	-17.7572	0	15.2428	-53.8096	0	46.1904	-9.14763	0	7.85237	0	0	57038
1340	Lotte Shopping	0.204011	111	3	-6.785795465139850E-02	GS Caltex(0.493124); Samsung Electronics(0.037487)	-29.4516	0	7.54839	-48.5554	0	12.4446	-58.9032	-1.97174	13.125	0	0	26687
1341	POSCO	1.24904	111	5	-2.640567529497110E-01	Samsung Electronics(0.294365)	2.49041	0	12.4904	65.7468	-261.265	68.4819	1.2452	-0.646056	5.59915	0	0	61504
1342	Samsung Electronics	1.46316	111	3	2.603748090902260E-01	Samsung Electronics(1.000000)	13.4317	0	42.4317	73.6429	0	232.643	6.02112	0	19.0211	0	0	208938
1343	SK Holdings	1.02748	111	5	-1.390097606585760E-01	Samsung Electronics(0.508514)	0.577151	0	21.5772	5.79899	-98.4967	118.302	0.687084	-16.0146	9.67252	0	0	106248
1344	S-Oil	1.78545	111	2	-2.294748774109880E-01	GS Caltex(0.709350)	7.06901	-7.49887	8.57014	2.35634	0	5.35634	8.6399	-1.78544	17.8545	0	0	27122
1345	GS Caltex	0.518115	112	6	2.451951057720400E-01	GS Caltex(1.000000)	-11.5652	0	12.4348	-7.22827	0	7.77173	-24.0942	0	25.9058	0	0	38235
1346	Hanwha	0.276233	112	5	5.849675334429970E-01	Hanwha(1.000000)	-41.2547	0	15.7453	-162.124	0	61.8763	-12.304	0	4.69597	0	0	35574
1347	Hyundai Motor	0.910936	112	2	-1.097939290726800E-01	Hanwha(0.359807); LG Electronics(1.261812)	-2.76098	-2.86591	25.3731	-8.01573	0	81.9843	-1.15783	0	11.8422	0	0	84771
1348	KEPCO	1.71323	112	2	3.608359113880130E-01	SK Holdings(0.510617)	4.99264	0	11.9926	54.2058	-9.70833	120.497	171.889	-398.613	14.277	0	0	54252
1349	KIA Motor	0.421419	112	10	3.852833940402830E-02	KIA Motor(1.000000)	-18.5146	0	13.4854	-14.4645	0	10.5355	-22.5647	0	16.4353	0	0	44730
1350	KOGAS	1.41505	112	5	3.167460362978920E-01	Lotte Shopping(1.038220); SK Holdings(0.072510)	2.49033	0	8.49033	8.30109	0	28.3011	12.8667	-28.2647	15.602	0	0	35411
1351	LG Electronics	0.473294	112	10	8.311563017629730E-01	LG Electronics(1.000000)	-17.3813	0	15.6187	-52.6706	0	47.3294	-8.95401	0	8.04599	0	0	57038
1352	Lotte Shopping	0.176688	112	10	-5.694462245872560E-02	Lotte Shopping(1.000000)	-30.4625	0	6.53746	-50.222	0	10.778	-60.9251	0	13.0749	0	0	26687
1353	POSCO	1.73025	112	8	-1.525008745431490E-01	Hanwha(0.076761); LG Electronics(1.030423)	7.3025	0	17.3025	192.786	-403.267	53.519	3.65125	0	8.65125	0	0	61504
1354	Samsung Electronics	2.23573	112	2	1.986335604912750E-01	Hanwha(1.269588); LG Electronics(2.871308)	35.8361	0	64.8361	196.481	-141.026	214.455	16.0645	0	29.0645	0	0	208938
1355	SK Holdings	1.11841	112	11	-4.464628656951640E-01	SK Holdings(1.000000)	2.48658	0	23.4866	24.9842	0	235.984	2.96022	0	27.9602	0	0	106248
1356	S-Oil	1.52649	112	3	5.060606891481590E-02	S-Oil(1.000000)	4.73837	0	13.7384	1.57946	0	4.57946	5.79134	0	16.7913	0	0	27122
1357	GS Caltex	0.503652	113	5	-4.142183508288090E-01	KIA Motor(0.581531); S-Oil(0.450672)	-11.9123	0	12.0877	-7.44522	0	7.55478	-24.8174	-10.4361	14.7465	0	0	38235
1358	Hanwha	0.142765	113	3	2.570350931971150E-01	Samsung Electronics(0.170261)	-48.8624	-2.72352	5.41409	-192.021	-2.29522	29.6841	-14.573	0	2.42701	0	0	35574
1359	Hyundai Motor	0.694561	113	6	4.330915775264530E-01	LG Electronics(1.105836); Samsung Electronics(0.103841)	-9.46861	-3.57528	17.9561	-27.4895	0	62.5105	-3.97071	0	9.02929	0	0	84771
1360	KEPCO	1.16328	113	12	-6.039388589341250E-01	KEPCO(1.000000)	1.14294	0	8.14294	12.409	0	88.409	39.3497	0	280.35	0	0	54252
1361	KIA Motor	0.422969	113	4	8.646342143195620E-02	KIA Motor(1.000000)	-18.465	0	13.535	-14.4258	0	10.5742	-22.5042	0	16.4958	0	0	44730
1362	KOGAS	1.16234	113	11	-1.050179591690820E-02	KIA Motor(0.235565); Samsung Electronics(0.119051)	0.974034	0	6.97403	3.24678	0	23.2468	5.03251	-30.4497	5.58285	0	0	35411
1363	LG Electronics	0.401563	113	6	2.289712372607120E-01	LG Electronics(1.000000)	-19.7484	0	13.2516	-59.8437	0	40.1563	-10.1734	0	6.82658	0	0	57038
1364	Lotte Shopping	0.184596	113	10	-3.344987738515790E-01	KIA Motor(0.411521); Samsung Electronics(0.039627)	-30.17	0	6.83005	-49.7397	0	11.2603	-60.3399	-6.30685	7.35325	0	0	26687
1365	POSCO	0.936024	113	1	2.416053800324790E-01	KEPCO(0.001750); Samsung Electronics(0.293911)	-0.639762	0	9.36024	-16.8897	-195.714	51.3965	-0.319881	0	4.68012	0	0	61504
1366	Samsung Electronics	1.09651	113	12	-3.719654950132760E-01	Samsung Electronics(1.000000)	2.79876	0	31.7988	15.3449	0	174.345	1.25462	0	14.2546	0	0	208938
1367	SK Holdings	0.769771	113	9	-1.278553457443850E-01	KEPCO(0.043360); Samsung Electronics(0.497256)	-4.8348	0	16.1652	-48.5783	-71.8943	90.5275	-5.75572	0	19.2443	0	0	106248
1368	S-Oil	1.03959	113	12	-1.506793056315310E-01	S-Oil(1.000000)	0.356305	0	9.35631	0.118768	0	3.11877	0.435483	0	11.4355	0	0	27122
1369	GS Caltex	0.51604	114	10	-2.318277095375920E-01	GS Caltex(1.000000)	-11.615	0	12.385	-7.2594	0	7.7406	-24.198	0	25.802	0	0	38235
1370	Hanwha	0.133488	114	1	-1.487357961151780E-01	Samsung Electronics(0.170261)	-49.3912	-2.54653	5.06227	-194.099	-2.14607	27.7552	-14.7307	0	2.26929	0	0	35574
1371	Hyundai Motor	0.670972	114	8	-1.581807508356140E-01	Samsung Electronics(0.363963); S-Oil(0.321706)	-10.1999	-6.81095	13.9892	-29.6125	0	60.3875	-4.27736	0	8.72264	0	0	84771
1372	KEPCO	1.10288	114	1	1.957526787930870E-02	Samsung Electronics(0.259656)	0.72019	0	7.72019	7.81921	-41.4913	42.3279	24.7951	-262.334	3.46077	0	0	54252
1373	KIA Motor	0.446224	114	2	2.576093758951480E-01	GS Caltex(0.081346); Samsung Electronics(0.039855); S-Oil(1.227507)	-17.7208	0	14.2792	-13.8444	0	11.1556	-21.5973	0	17.4027	0	0	44730
1374	KOGAS	1.11694	114	1	3.401472997884390E-02	GS Caltex(0.239428); Samsung Electronics(0.125666)	0.701664	0	6.70166	2.33888	0	22.3389	3.62526	-26.7726	7.85264	0	0	35411
1375	LG Electronics	0.392404	114	6	2.433277977837840E-01	Samsung Electronics(0.234791); S-Oil(0.294275)	-20.0507	-3.07084	9.87847	-60.7596	0	39.2404	-10.3291	0	6.67086	0	0	57038
1376	Lotte Shopping	0.184116	114	3	2.993153930876850E-01	GS Caltex(0.434137); Samsung Electronics(0.048281)	-30.1877	0	6.81229	-49.7689	0	11.2311	-60.3754	-1.77946	11.8451	0	0	26687
1377	POSCO	0.875217	114	5	9.148704623171320E-01	Samsung Electronics(0.294365)	-1.24783	0	8.75217	-32.9428	-183.071	47.986	-0.623916	-0.452698	3.92339	0	0	61504
1378	Samsung Electronics	1.02525	114	12	6.232763592838150E-02	Samsung Electronics(1.000000)	0.732381	0	29.7324	4.01547	0	163.015	0.328309	0	13.3283	0	0	208938
1379	SK Holdings	0.719969	114	5	3.012354551987330E-01	Samsung Electronics(0.508514)	-5.88065	0	15.1193	-59.0866	-69.0177	82.8957	-7.00078	-11.2216	6.77764	0	0	106248
1380	S-Oil	1.09406	114	9	3.491986343930200E-01	S-Oil(1.000000)	0.84655	0	9.84655	0.282183	0	3.28218	1.03467	0	12.0347	0	0	27122
1381	GS Caltex	0.557402	115	2	6.355068219656690E-02	LG Electronics(0.109676); S-Oil(1.179090)	-10.6224	0	13.3776	-6.63898	0	8.36102	-22.1299	-12.5426	15.3275	0	0	38235
1382	Hanwha	0.238934	115	2	-5.570380160429280E-01	LG Electronics(0.504814); POSCO(0.110243)	-43.3807	-5.69728	7.92198	-170.479	0	53.5213	-12.9381	0	4.06188	0	0	35574
1383	Hyundai Motor	0.772096	115	11	6.675592089363930E-01	LG Electronics(1.444307); POSCO(0.038869)	-7.06503	-4.43781	19.4972	-20.5114	0	69.4886	-2.96276	0	10.0372	0	0	84771
1384	KEPCO	1.03977	115	6	-1.198699622207680E-01	KEPCO(1.000000)	0.278411	0	7.27841	3.02275	0	79.0227	9.58529	0	250.585	0	0	54252
1385	KIA Motor	0.473297	115	10	6.271669051941990E-01	LG Electronics(0.190690); S-Oil(1.248191)	-16.8545	0	15.1455	-13.1676	0	11.8324	-20.5414	-1.72597	16.7326	0	0	44730
1386	KOGAS	1.32769	115	8	3.469946077273890E-01	KEPCO(0.042375); LG Electronics(0.580526)	1.96615	0	7.96615	6.55384	0	26.5538	10.1584	-26.595	14.5635	0	0	35411
1387	LG Electronics	0.399728	115	10	1.781896625433950E-01	LG Electronics(1.000000)	-19.809	0	13.191	-60.0273	0	39.9727	-10.2046	0	6.79537	0	0	57038
1388	Lotte Shopping	0.207144	115	8	6.255426415946000E-02	LG Electronics(0.283367); S-Oil(0.388035)	-29.3357	0	7.66433	-48.3642	0	12.6358	-58.6713	-8.6041	6.72455	0	0	26687
1389	POSCO	1.14562	115	11	3.001349199354190E-01	POSCO(1.000000)	1.45622	0	11.4562	38.4443	0	302.444	0.728112	0	5.72811	0	0	61504
1390	Samsung Electronics	1.84509	115	2	2.974330032789050E-01	LG Electronics(3.052170); POSCO(0.566603)	24.5076	-6.75531	46.7523	134.369	0	293.369	10.9862	0	23.9862	0	0	208938
1391	SK Holdings	0.965786	115	3	5.327311329903160E-01	SK Holdings(1.000000)	-0.718493	0	20.2815	-7.21914	0	203.781	-0.855349	0	24.1447	0	0	106248
1392	S-Oil	1.1243	115	10	4.403188362751840E-01	S-Oil(1.000000)	1.11873	0	10.1187	0.372911	0	3.37291	1.36734	0	12.3673	0	0	27122
1393	GS Caltex	0.523324	116	11	-1.333344418524080E-02	KIA Motor(0.613091); S-Oil(0.398622)	-11.4402	0	12.5598	-7.15015	0	7.84985	-23.8338	-10.8438	15.3224	0	0	38235
1394	Hanwha	0.141232	116	1	-6.172500776627310E-01	Samsung Electronics(0.170261)	-48.9498	-2.69427	5.35595	-192.364	-2.27058	29.3654	-14.5991	0	2.40094	0	0	35574
1395	Hyundai Motor	0.701833	116	5	6.960464524284370E-02	KIA Motor(0.257009); Samsung Electronics(0.350702)	-9.24318	-7.29627	14.4606	-26.835	0	63.165	-3.87617	0	9.12383	0	0	84771
1396	KEPCO	1.16687	116	11	-1.452767638764620E-01	Samsung Electronics(0.259656)	1.16807	0	8.16807	12.6819	-43.8983	44.7836	40.215	-277.553	3.66155	0	0	54252
1397	KIA Motor	0.416866	116	4	-1.249242398084040E-02	KIA Motor(1.000000)	-18.6603	0	13.3397	-14.5784	0	10.4216	-22.7422	0	16.2578	0	0	44730
1398	KOGAS	1.14858	116	3	-9.354869232548630E-02	KIA Motor(0.236184); Samsung Electronics(0.118918)	0.891459	0	6.89146	2.97153	0	22.9715	4.60587	-30.0891	5.51675	0	0	35411
1399	LG Electronics	0.408783	116	1	5.152064898827270E-01	KIA Motor(0.234138); Samsung Electronics(0.222865)	-19.5102	-3.35576	10.1341	-59.1217	0	40.8783	-10.0507	0	6.9493	0	0	57038
1400	Lotte Shopping	0.182143	116	4	2.837156357867240E-01	KIA Motor(0.411998); Samsung Electronics(0.039525)	-30.2607	0	6.73929	-49.8893	0	11.1107	-60.5214	-6.22304	7.25553	0	0	26687
1401	POSCO	0.925992	116	9	-4.351640408291630E-01	Samsung Electronics(0.294365)	-0.740083	0	9.25992	-19.5382	-193.692	50.7699	-0.370042	-0.478961	4.151	0	0	61504
1402	Samsung Electronics	1.08473	116	6	-3.174787871679710E-01	Samsung Electronics(1.000000)	2.45728	0	31.4573	13.4727	0	172.473	1.10154	0	14.1015	0	0	208938
1403	SK Holdings	0.761737	116	11	-1.392458453601190E-01	Samsung Electronics(0.508514)	-5.00352	0	15.9965	-50.2734	-73.0217	87.7048	-5.95657	-11.8726	7.17084	0	0	106248
1404	S-Oil	1.22124	116	10	-7.741385046959620E-01	S-Oil(1.000000)	1.99115	0	10.9912	0.663718	0	3.66372	2.43363	0	13.4336	0	0	27122
1405	GS Caltex	0.509967	117	10	1.973191590807780E-01	GS Caltex(1.000000)	-11.7608	0	12.2392	-7.3505	0	7.6495	-24.5017	0	25.4983	0	0	38235
1406	Hanwha	0.132872	117	10	-5.725621476429100E-02	Hanwha(1.000000)	-49.4263	0	7.57371	-194.237	0	29.7634	-14.7412	0	2.25883	0	0	35574
1407	Hyundai Motor	0.716403	117	3	-2.351352713972800E-02	Hanwha(2.124939); S-Oil(0.338412)	-8.79151	-2.42205	19.7864	-25.5237	0	64.4763	-3.68676	0	9.31324	0	0	84771
1408	KEPCO	1.13084	117	7	6.236582080775420E-02	SK Holdings(0.510617)	0.915905	0	7.91591	9.94411	-6.40811	79.536	31.5333	-263.11	9.4237	0	0	54252
1409	KIA Motor	0.496438	117	11	7.510511114601660E-02	GS Caltex(0.154753); Hanwha(0.240950); S-Oil(1.115017)	-16.114	0	15.886	-12.5891	0	12.4109	-19.6389	0	19.3611	0	0	44730
1410	KOGAS	1.33734	117	5	8.585836322712680E-02	GS Caltex(0.118330); Hanwha(0.868236)	2.02404	0	8.02404	6.74681	0	26.7468	10.4576	-36.4791	4.97842	0	0	35411
1411	LG Electronics	0.419605	117	4	-4.689433738678040E-01	Hanwha(1.372857); S-Oil(0.302338)	-19.153	-0.150244	13.6967	-58.0395	0	41.9605	-9.86671	0	7.13329	0	0	57038
1412	Lotte Shopping	0.19973	117	1	2.572670155905630E-01	GS Caltex(0.416776); Hanwha(0.302231)	-29.61	0	7.39002	-48.8165	0	12.1835	-59.22	-3.47025	11.3098	0	0	26687
1413	POSCO	1.17172	117	9	-6.317397602883460E-01	POSCO(1.000000)	1.71722	0	11.7172	45.3345	0	309.335	0.858609	0	5.85861	0	0	61504
1414	Samsung Electronics	1.42351	117	8	4.748289222497320E-01	Hanwha(4.429270); POSCO(0.087586); SK Holdings(0.432801)	12.2819	0	41.2819	67.3384	0	226.338	5.50566	0	18.5057	0	0	208938
1415	SK Holdings	0.738221	117	10	-1.911111366188690E-01	SK Holdings(1.000000)	-5.49736	0	15.5026	-55.2354	0	155.765	-6.54448	0	18.4555	0	0	106248
1416	S-Oil	1.21245	117	4	7.446362529366420E-01	S-Oil(1.000000)	1.91201	0	10.912	0.637337	0	3.63734	2.3369	0	13.3369	0	0	27122
1417	GS Caltex	0.541891	118	10	-4.382800432047170E-01	GS Caltex(1.000000)	-10.9946	0	13.0054	-6.87163	0	8.12837	-22.9054	0	27.0946	0	0	38235
1418	Hanwha	0.152824	118	10	6.175653891598100E-01	Hanwha(1.000000)	-48.289	0	8.71096	-189.767	0	34.2325	-14.402	0	2.59801	0	0	35574
1419	Hyundai Motor	0.818639	118	9	-2.840177877424840E-01	Hyundai Motor(1.000000)	-5.62219	0	25.3778	-16.3225	0	73.6775	-2.35769	0	10.6423	0	0	84771
1420	KEPCO	1.11561	118	6	-4.207497621630730E-01	KEPCO(1.000000)	0.809273	0	7.80927	8.7864	0	84.7864	27.8621	0	268.862	0	0	54252
1421	KIA Motor	0.596765	118	11	-5.547296101448950E-01	Hanwha(0.192829); Lotte Shopping(0.268150); S-Oil(1.132446)	-12.9035	0	19.0965	-10.0809	0	14.9191	-15.7262	0	23.2738	0	0	44730
1422	KOGAS	1.40438	118	7	-3.621424377267600E-01	Hanwha(0.274850); KEPCO(0.121454); Lotte Shopping(0.713619)	2.42625	0	8.42625	8.08751	0	28.0875	12.5356	0	43.5356	0	0	35411
1423	LG Electronics	0.487763	118	3	-1.144597814643440E-01	Hanwha(1.254290); Hyundai Motor(0.063102); S-Oil(0.260624)	-16.9038	0	16.0962	-51.2237	0	48.7763	-8.70803	0	8.29197	0	0	57038
1424	Lotte Shopping	0.192531	118	6	-4.244094677495650E-01	Lotte Shopping(1.000000)	-29.8763	0	7.12365	-49.2556	0	11.7444	-59.7527	0	14.2473	0	0	26687
1425	POSCO	1.49982	118	7	3.442686505055740E-01	Hanwha(1.711589); KEPCO(0.011353)	4.99824	0	14.9982	131.954	-336.399	59.5546	2.49912	0	7.49912	0	0	61504
1426	Samsung Electronics	1.7588	118	8	-3.909175281132810E-01	Hanwha(5.829549); KEPCO(0.028711)	22.0052	0	51.0052	120.649	-77.6545	201.995	9.86439	0	22.8644	0	0	208938
1427	SK Holdings	1.2166	118	8	-1.614828951630770E-01	Hanwha(2.856246); KEPCO(0.085525)	4.54853	0	25.5485	45.7019	-151.674	105.028	5.41491	0	30.4149	0	0	106248
1428	S-Oil	1.52144	118	3	4.756557062073420E-02	S-Oil(1.000000)	4.69298	0	13.693	1.56433	0	4.56433	5.73587	0	16.7359	0	0	27122
1429	GS Caltex	0.509804	119	6	1.890577155513510E-01	GS Caltex(1.000000)	-11.7647	0	12.2353	-7.35294	0	7.64706	-24.5098	0	25.4902	0	0	38235
1430	Hanwha	0.131994	119	10	-2.144425517940050E-02	Hanwha(1.000000)	-49.4763	0	7.52366	-194.433	0	29.5667	-14.7561	0	2.2439	0	0	35574
1431	Hyundai Motor	0.680397	119	11	6.650019608691380E-01	LG Electronics(1.096462); Samsung Electronics(0.106400)	-9.90769	-3.50237	17.5899	-28.7643	0	61.2357	-4.15484	0	8.84516	0	0	84771
1432	KEPCO	1.11409	119	5	-3.167566481465110E-01	SK Holdings(0.510617)	0.798655	0	7.79866	8.67111	-6.3132	78.3579	27.4966	-259.212	9.28411	0	0	54252
1433	KIA Motor	0.435779	119	2	2.792678423523110E-03	GS Caltex(0.080414); Samsung Electronics(0.038066); S-Oil(1.242604)	-18.0551	0	13.9449	-14.1055	0	10.8945	-22.0046	0	16.9954	0	0	44730
1434	KOGAS	1.13183	119	2	-4.009798026552890E-01	GS Caltex(0.245585); Samsung Electronics(0.124540)	0.790952	0	6.79095	2.63651	0	22.6365	4.08658	-27.1293	7.95726	0	0	35411
1435	LG Electronics	0.396738	119	10	-1.573547427320270E-01	LG Electronics(1.000000)	-19.9077	0	13.0923	-60.3262	0	39.6738	-10.2555	0	6.74454	0	0	57038
1436	Lotte Shopping	0.184246	119	8	-3.841251795032270E-01	GS Caltex(0.439758); Samsung Electronics(0.047253)	-30.1829	0	6.8171	-49.761	0	11.239	-60.3658	-1.78072	11.8535	0	0	26687
1437	POSCO	0.894142	119	7	-1.887576597095580E-01	Samsung Electronics(0.273618); SK Holdings(0.040799)	-1.05858	0	8.94142	-27.9466	-184.185	51.8681	-0.529292	0	4.47071	0	0	61504
1438	Samsung Electronics	1.04831	119	10	1.654414217236400E-01	Samsung Electronics(1.000000)	1.40112	0	30.4011	7.682	0	166.682	0.628088	0	13.6281	0	0	208938
1439	SK Holdings	0.727286	119	10	1.209137906424300E-01	SK Holdings(1.000000)	-5.72699	0	15.273	-57.5426	0	153.457	-6.81784	0	18.1822	0	0	106248
1440	S-Oil	1.05547	119	6	1.941069468665110E-01	S-Oil(1.000000)	0.499243	0	9.49924	0.166414	0	3.16641	0.610186	0	11.6102	0	0	27122
1441	GS Caltex	0.754308	120	1	2.885058724808300E-01	KIA Motor(0.854795)	-5.89662	-3.62068	14.4827	-3.68539	0	11.3146	-12.2846	-20.0646	17.6508	0	0	38235
1442	Hanwha	0.136192	120	12	-1.602331042344550E-01	Hanwha(1.000000)	-49.2371	0	7.76295	-193.493	0	30.507	-14.6847	0	2.31527	0	0	35574
1443	Hyundai Motor	0.742636	120	2	-1.418025885696750E-01	Hanwha(2.089684); KIA Motor(0.233235)	-7.97828	-2.84795	20.1738	-23.1627	0	66.8373	-3.34573	0	9.65427	0	0	84771
1444	KEPCO	1.11198	120	4	4.115196012494130E-01	KEPCO(1.000000)	0.783852	0	7.78385	8.5104	0	84.5104	26.9869	0	267.987	0	0	54252
1445	KIA Motor	0.529465	120	9	-3.607294303698750E-01	KIA Motor(1.000000)	-15.0571	0	16.9429	-11.7634	0	13.2366	-18.3509	0	20.6491	0	0	44730
1446	KOGAS	1.29798	120	3	2.433890577044790E-01	Hanwha(0.285050); KEPCO(0.112620); Lotte Shopping(0.717983)	1.78789	0	7.78789	5.95964	0	25.9596	9.23744	0	40.2374	0	0	35411
1447	LG Electronics	0.436595	120	11	-3.818541076734980E-01	Hanwha(1.340381); KIA Motor(0.209150)	-18.5924	-0.458711	13.9489	-56.3405	0	43.6595	-9.57789	0	7.42211	0	0	57038
1448	Lotte Shopping	0.176864	120	6	7.658525408610070E-02	Lotte Shopping(1.000000)	-30.456	0	6.54396	-50.2113	0	10.7887	-60.9121	0	13.0879	0	0	26687
1449	POSCO	0.939145	120	12	3.691044211182940E-01	POSCO(1.000000)	-0.608547	0	9.39145	-16.0656	0	247.934	-0.304274	0	4.69573	0	0	61504
1450	Samsung Electronics	1.47666	120	11	-1.500481188957510E-01	Samsung Electronics(1.000000)	13.8231	0	42.8231	75.7889	0	234.789	6.19658	0	19.1966	0	0	208938
1451	SK Holdings	0.957321	120	11	1.984174474006730E-01	SK Holdings(1.000000)	-0.896267	0	20.1037	-9.00535	0	201.995	-1.06699	0	23.933	0	0	106248
1452	S-Oil	2.67534	120	2	-1.215284817064700E-01	KIA Motor(0.606349)	15.0781	-13.8048	10.2733	5.02602	0	8.02602	18.4287	-16.9082	12.5206	0	0	27122
1453	GS Caltex	0.504576	121	9	6.013621311086840E-01	GS Caltex(1.000000)	-11.8902	0	12.1098	-7.43136	0	7.56864	-24.7712	0	25.2288	0	0	38235
1454	Hanwha	0.169199	121	11	4.770680781796680E-01	Hanwha(1.000000)	-47.3557	0	9.64434	-186.099	0	37.9006	-14.1236	0	2.87638	0	0	35574
1455	Hyundai Motor	0.918771	121	8	-9.968054379835570E-02	GS Caltex(0.229918); Hanwha(2.135832)	-2.51809	-5.09895	23.383	-7.31057	0	82.6894	-1.05597	0	11.944	0	0	84771
1456	KEPCO	1.6414	121	5	2.505795031022150E-01	KOGAS(1.532066)	4.48983	0	11.4898	48.7467	-86.4473	38.2994	154.578	-336.214	59.3641	0	0	54252
1457	KIA Motor	0.63614	121	8	8.871873297334220E-01	GS Caltex(0.957335); Hanwha(0.228434)	-11.6435	-6.56023	13.7962	-9.0965	0	15.9035	-14.1905	0	24.8095	0	0	44730
1458	KOGAS	1.24993	121	11	6.701241115141540E-01	KOGAS(1.000000)	1.49956	0	7.49956	4.99854	0	24.9985	7.74774	0	38.7477	0	0	35411
1459	LG Electronics	0.539396	121	7	-3.053705977327630E-01	GS Caltex(0.205890); Hanwha(1.382071)	-15.1999	-1.9776	15.8225	-46.0604	0	53.9396	-7.83027	0	9.16973	0	0	57038
1460	Lotte Shopping	0.209762	121	3	-3.905367249254470E-01	GS Caltex(0.430437); Hanwha(0.181143); KOGAS(0.106895)	-29.2388	0	7.76119	-48.2045	0	12.7955	-58.4776	0	15.5224	0	0	26687
1461	POSCO	1.64828	121	8	2.161126467292340E-01	Hanwha(1.638239); KOGAS(0.091082)	6.48281	0	16.4828	171.146	-370.779	64.3671	3.24141	0	8.24141	0	0	61504
1462	Samsung Electronics	1.93654	121	2	1.109314902880810E-01	Hanwha(5.643622); KOGAS(0.230770)	27.1597	0	56.1597	148.91	-88.2447	219.665	12.175	0	25.175	0	0	208938
1463	SK Holdings	1.30467	121	7	1.587659292408250E-01	Hanwha(2.320208); KOGAS(0.669535)	6.39811	0	27.3981	64.2858	-170.611	104.675	7.6168	0	32.6168	0	0	106248
1464	S-Oil	1.7896	121	5	7.079451184093550E-02	GS Caltex(0.709350)	7.10644	-7.51634	8.5901	2.36881	0	5.36881	8.68564	-1.7896	17.896	0	0	27122
1465	GS Caltex	0.51078	122	4	2.035234707439960E-01	LG Electronics(0.103601); S-Oil(1.191867)	-11.7413	0	12.2587	-7.33829	0	7.66171	-24.461	-11.4935	14.0455	0	0	38235
1466	Hanwha	0.169188	122	5	-7.763379451779640E-02	Samsung Electronics(0.170261)	-47.3563	-3.22759	6.41615	-186.102	-2.72003	35.1782	-14.1238	0	2.8762	0	0	35574
1467	Hyundai Motor	0.704075	122	8	-3.089794816850470E-03	LG Electronics(1.160847); Samsung Electronics(0.088824)	-9.17367	-3.62426	18.2021	-26.6332	0	63.3668	-3.84702	0	9.15298	0	0	84771
1468	KEPCO	1.17381	122	11	-4.269371658770610E-01	SK Holdings(0.510617)	1.21669	0	8.21669	13.2098	-6.65161	82.5582	41.8889	-273.107	9.78177	0	0	54252
1469	KIA Motor	0.436007	122	8	1.323319902742410E-01	LG Electronics(0.181081); S-Oil(1.268399)	-18.0478	0	13.9522	-14.0998	0	10.9002	-21.9957	-1.58998	15.4143	0	0	44730
1470	KOGAS	1.28535	122	3	8.842926703411930E-02	LG Electronics(0.528202); Samsung Electronics(0.025287)	1.71208	0	7.71208	5.70694	0	25.7069	8.84575	-35.9366	3.90916	0	0	35411
1471	LG Electronics	0.387774	122	6	5.399181360033110E-02	LG Electronics(1.000000)	-20.2035	0	12.7965	-61.2226	0	38.7774	-10.4078	0	6.59216	0	0	57038
1472	Lotte Shopping	0.195543	122	2	2.944734268811800E-02	LG Electronics(0.275743); S-Oil(0.404069)	-29.7649	0	7.23509	-49.0719	0	11.9281	-59.5298	-8.12223	6.34794	0	0	26687
1473	POSCO	1.09473	122	5	4.557482027286390E-01	Samsung Electronics(0.270256); SK Holdings(0.047411)	0.947285	0	10.9473	25.0083	-225.504	63.5039	0.473642	0	5.47364	0	0	61504
1474	Samsung Electronics	1.29945	122	11	4.472704287267790E-01	Samsung Electronics(1.000000)	8.68417	0	37.6842	47.6132	0	206.613	3.8929	0	16.8929	0	0	208938
1475	SK Holdings	0.766272	122	4	3.327979567094260E-01	SK Holdings(1.000000)	-4.9083	0	16.0917	-49.3167	0	161.683	-5.84321	0	19.1568	0	0	106248
1476	S-Oil	1.01922	122	10	-3.931907355230080E-02	S-Oil(1.000000)	0.173001	0	9.173	0.057667	0	3.05767	0.211445	0	11.2114	0	0	27122
1477	GS Caltex	1.16314	123	5	-3.392365169849230E-01	Lotte Shopping(1.432720)	3.91529	-17.3327	10.5826	2.44706	0	17.4471	8.15686	-36.9916	21.1653	0	0	38235
1478	Hanwha	0.131694	123	12	2.960377469596210E-01	Samsung Electronics(0.170261)	-49.4934	-2.51233	4.99426	-194.5	-2.11724	27.3823	-14.7612	0	2.23881	0	0	35574
1479	Hyundai Motor	0.698428	123	5	2.173624520712790E-01	Lotte Shopping(0.285995); Samsung Electronics(0.369194)	-9.34873	-8.70925	12.942	-27.1415	0	62.8585	-3.92043	0	9.07957	0	0	84771
1480	KEPCO	1.08807	123	2	-6.596611135112160E-02	Samsung Electronics(0.259656)	0.616475	0	7.61648	6.69316	-40.9339	41.7593	21.2244	-258.81	3.41428	0	0	54252
1481	KIA Motor	0.816432	123	5	9.566057302383840E-02	Lotte Shopping(1.676097)	-5.87418	-13.7455	12.3803	-4.5892	0	20.4108	-7.15915	-7.08021	24.7606	0	0	44730
1482	KOGAS	1.14482	123	2	-3.401091350886510E-01	Lotte Shopping(0.521330); Samsung Electronics(0.102893)	0.868908	0	6.86891	2.89636	0	22.8964	4.48936	-26.4349	9.05447	0	0	35411
1483	LG Electronics	0.416714	123	9	9.696367933527810E-02	Lotte Shopping(0.266894); Samsung Electronics(0.238900)	-19.2484	-4.77252	8.97904	-58.3286	0	41.6714	-9.91586	0	7.08414	0	0	57038
1484	Lotte Shopping	0.199632	123	9	8.454619563854180E-02	Lotte Shopping(1.000000)	-29.6136	0	7.3864	-48.8224	0	12.1776	-59.2272	0	14.7728	0	0	26687
1485	POSCO	0.863459	123	6	3.675296554505070E-01	Samsung Electronics(0.294365)	-1.36541	0	8.63459	-36.0469	-180.612	47.3414	-0.682706	-0.446617	3.87068	0	0	61504
1486	Samsung Electronics	1.01148	123	4	6.286899975734340E-03	Samsung Electronics(1.000000)	0.332948	0	29.3329	1.82547	0	160.825	0.149253	0	13.1493	0	0	208938
1487	SK Holdings	0.710297	123	10	-2.047867683611870E-01	Samsung Electronics(0.508514)	-6.08377	0	14.9162	-61.1274	-68.0905	81.7821	-7.24258	-11.0708	6.68659	0	0	106248
1488	S-Oil	4.12536	123	8	-1.992667150545580E-01	Lotte Shopping(1.016300)	28.1282	-29.6214	7.5068	9.37607	0	12.3761	34.3789	-30.3653	15.0136	0	0	27122
1489	GS Caltex	0.600786	124	5	-3.441988696357230E-01	Samsung Electronics(0.026952); S-Oil(1.202115)	-9.58114	0	14.4189	-5.98821	0	9.01179	-19.9607	-13.0483	16.991	0	0	38235
1490	Hanwha	0.136045	124	3	4.097713310903870E-01	Samsung Electronics(0.170261)	-49.2454	-2.59532	5.15925	-193.526	-2.18719	28.2869	-14.6872	0	2.31277	0	0	35574
1491	Hyundai Motor	0.664228	124	4	-6.067916545694370E-02	Hyundai Motor(1.000000)	-10.4089	0	20.5911	-30.2195	0	59.7805	-4.36504	0	8.63496	0	0	84771
1492	KEPCO	1.0684	124	12	-2.491746864659950E-01	KEPCO(1.000000)	0.478811	0	7.47881	5.19852	0	81.1985	16.4848	0	257.485	0	0	54252
1493	KIA Motor	0.501327	124	2	2.855346184513470E-01	Samsung Electronics(0.046051); S-Oil(1.294456)	-15.9575	0	16.0425	-12.4668	0	12.5332	-19.4483	-1.02429	18.5275	0	0	44730
1494	KOGAS	1.17623	124	3	-3.579840718146290E-01	Samsung Electronics(0.135686); S-Oil(0.260343)	1.0574	0	7.05739	3.52465	0	23.5247	5.46321	-31.0196	5.44358	0	0	35411
1495	LG Electronics	0.395279	124	3	-1.384831044803630E-01	Hyundai Motor(0.458784); Samsung Electronics(0.069871); S-Oil(0.130810)	-19.9558	0	13.0442	-60.4721	0	39.5279	-10.2803	0	6.71974	0	0	57038
1496	Lotte Shopping	0.203408	124	8	-1.115615675547510E-01	Samsung Electronics(0.063441); S-Oil(0.495237)	-29.4739	0	7.52609	-48.5921	0	12.4079	-58.9478	-7.34144	7.71073	0	0	26687
1497	POSCO	0.891914	124	6	-5.310012653553900E-01	KEPCO(0.001815); Samsung Electronics(0.293893)	-1.08086	0	8.91914	-28.5346	-186.491	48.9745	-0.540428	0	4.45957	0	0	61504
1498	Samsung Electronics	1.0449	124	6	-1.558698187881110E-01	Samsung Electronics(1.000000)	1.30202	0	30.302	7.13868	0	166.139	0.583666	0	13.5837	0	0	208938
1499	SK Holdings	0.732929	124	9	-3.379231660847920E-01	KEPCO(0.044951); Samsung Electronics(0.496843)	-5.60848	0	15.3915	-56.3519	-68.4534	86.1948	-6.67676	0	18.3232	0	0	106248
1500	S-Oil	1.25724	124	9	-2.811448465975970E-01	S-Oil(1.000000)	2.3152	0	11.3152	0.771733	0	3.77173	2.82969	0	13.8297	0	0	27122
1501	GS Caltex	0.550362	125	5	-3.263584497933380E-01	Samsung Electronics(0.024720); S-Oil(1.219304)	-10.7913	0	13.2087	-6.74457	0	8.25543	-22.4819	-11.9532	15.5649	0	0	38235
1502	Hanwha	0.135876	125	5	-7.284736024151960E-02	Samsung Electronics(0.170261)	-49.2551	-2.5921	5.15283	-193.564	-2.18447	28.2518	-14.6901	0	2.30989	0	0	35574
1503	Hyundai Motor	0.684332	125	5	-1.903866786811430E-02	Samsung Electronics(0.364685); S-Oil(0.316141)	-9.78571	-6.94657	14.2677	-28.4101	0	61.5899	-4.10368	0	8.89632	0	0	84771
1504	KEPCO	1.06134	125	10	-2.157252346054830E-01	KEPCO(1.000000)	0.429381	0	7.42938	4.66186	0	80.6619	14.783	0	255.783	0	0	54252
1505	KIA Motor	0.462295	125	11	-3.106737454555860E-01	Samsung Electronics(0.042518); S-Oil(1.321669)	-17.2066	0	14.7934	-13.4426	0	11.5574	-20.9705	-0.94454	17.085	0	0	44730
1506	KOGAS	1.15049	125	5	1.724999933294570E-01	Samsung Electronics(0.132881); S-Oil(0.281949)	0.902916	0	6.90292	3.00972	0	23.0097	4.66507	-30.3406	5.32442	0	0	35411
1507	LG Electronics	0.400503	125	12	4.103947010825240E-01	Samsung Electronics(0.235425); S-Oil(0.289391)	-19.7834	-3.13423	10.0824	-59.9497	0	40.0503	-10.1915	0	6.80855	0	0	57038
1508	Lotte Shopping	0.192879	125	8	1.479381278604100E-01	Samsung Electronics(0.060232); S-Oil(0.519957)	-29.8635	0	7.13652	-49.2344	0	11.7656	-59.727	-6.96144	7.3116	0	0	26687
1509	POSCO	0.890797	125	12	-1.503855693970550E-01	KEPCO(0.001825); Samsung Electronics(0.293891)	-1.09203	0	8.90797	-28.8296	-186.257	48.9131	-0.546015	0	4.45399	0	0	61504
1510	Samsung Electronics	1.0436	125	4	-1.447342802491440E-01	Samsung Electronics(1.000000)	1.26432	0	30.2643	6.93197	0	165.932	0.566765	0	13.5668	0	0	208938
1511	SK Holdings	0.731927	125	7	-4.019086565034160E-02	KEPCO(0.045189); Samsung Electronics(0.496781)	-5.62954	0	15.3705	-56.5634	-68.3597	86.0768	-6.70183	0	18.2982	0	0	106248
1512	S-Oil	1.13549	125	9	1.685247838335350E-01	S-Oil(1.000000)	1.21939	0	10.2194	0.406465	0	3.40646	1.49037	0	12.4904	0	0	27122
1513	GS Caltex	0.492102	126	6	4.088354945144560E-02	GS Caltex(1.000000)	-12.1895	0	11.8105	-7.61847	0	7.38153	-25.3949	0	24.6051	0	0	38235
1514	Hanwha	0.136226	126	10	1.602735844033330E-01	Hanwha(1.000000)	-49.2351	0	7.76485	-193.485	0	30.5145	-14.6842	0	2.31583	0	0	35574
1515	Hyundai Motor	0.715754	126	4	-4.237124483925730E-01	Samsung Electronics(0.361265); S-Oil(0.342489)	-8.81163	-7.26553	14.9228	-25.5822	0	64.4178	-3.6952	0	9.3048	0	0	84771
1516	KEPCO	1.18528	126	8	-3.877852897818420E-01	Samsung Electronics(0.259656)	1.29695	0	8.29695	14.0812	-44.591	45.4902	44.6521	-281.933	3.71932	0	0	54252
1517	KIA Motor	0.45121	126	7	-7.497312292523940E-01	GS Caltex(0.086256); Samsung Electronics(0.037499); S-Oil(1.238736)	-17.5613	0	14.4387	-13.7197	0	11.2803	-21.4028	0	17.5972	0	0	44730
1518	KOGAS	1.11336	126	12	-4.154741341445160E-01	KOGAS(1.000000)	0.68018	0	6.68018	2.26727	0	22.2673	3.51426	0	34.5143	0	0	35411
1519	LG Electronics	0.417481	126	11	-2.085172139220100E-01	Samsung Electronics(0.232431); S-Oil(0.312453)	-19.2231	-3.26709	10.5098	-58.2519	0	41.7481	-9.90283	0	7.09717	0	0	57038
1520	Lotte Shopping	0.182709	126	7	2.307171739852570E-01	GS Caltex(0.435216); KOGAS(0.066170); Samsung Electronics(0.036869)	-30.2398	0	6.76023	-49.8548	0	11.1452	-60.4795	0	13.5205	0	0	26687
1521	POSCO	0.940602	126	1	2.495437807808290E-02	Samsung Electronics(0.294365)	-0.593978	0	9.40602	-15.681	-196.748	51.5709	-0.296989	-0.486518	4.21649	0	0	61504
1522	Samsung Electronics	1.10185	126	10	-3.738787731386980E-01	Samsung Electronics(1.000000)	2.95362	0	31.9536	16.194	0	175.194	1.32404	0	14.324	0	0	208938
1523	SK Holdings	0.773756	126	2	-1.414345107022520E-01	Samsung Electronics(0.508514)	-4.75112	0	16.2489	-47.7375	-74.1739	89.0887	-5.6561	-12.0599	7.28398	0	0	106248
1524	S-Oil	1.09626	126	10	-3.533657315760170E-01	S-Oil(1.000000)	0.866321	0	9.86632	0.288774	0	3.28877	1.05884	0	12.0588	0	0	27122
1525	GS Caltex	0.545024	127	2	-3.030272709855450E-01	KIA Motor(0.617540); S-Oil(0.391285)	-10.9194	0	13.0806	-6.82463	0	8.17536	-22.7488	-11.2934	15.9578	0	0	38235
1526	Hanwha	0.13555	127	7	-2.729188916517730E-01	Samsung Electronics(0.170261)	-49.2737	-2.58587	5.14046	-193.637	-2.17922	28.1839	-14.6957	0	2.30434	0	0	35574
1527	Hyundai Motor	0.680215	127	2	-3.347491679360900E-01	KIA Motor(0.240910); Samsung Electronics(0.354149)	-9.91333	-7.07153	14.0151	-28.7806	0	61.2194	-4.1572	0	8.8428	0	0	84771
1528	KEPCO	1.11084	127	5	1.881516506733210E-01	SK Holdings(0.510617)	0.775894	0	7.77589	8.42399	-6.29477	78.1292	26.7129	-258.456	9.25702	0	0	54252
1529	KIA Motor	0.431024	127	10	1.368274860778480E-01	KIA Motor(1.000000)	-18.2072	0	13.7928	-14.2244	0	10.7756	-22.1901	0	16.8099	0	0	44730
1530	KOGAS	1.115	127	7	-4.546146866221420E-01	Lotte Shopping(0.564625); Samsung Electronics(0.097363)	0.690008	0	6.69001	2.30003	0	22.3	3.56504	-25.7464	8.81865	0	0	35411
1531	LG Electronics	0.397574	127	2	-3.902689764286270E-03	KIA Motor(0.220238); Samsung Electronics(0.225841)	-19.8801	-3.26375	9.8562	-60.2426	0	39.7574	-10.2412	0	6.75876	0	0	57038
1532	Lotte Shopping	0.179524	127	6	1.267728427575690E-01	Lotte Shopping(1.000000)	-30.3576	0	6.64238	-50.049	0	10.951	-60.7152	0	13.2848	0	0	26687
1533	POSCO	0.888229	127	1	6.891229571500210E-01	Samsung Electronics(0.273695); SK Holdings(0.040648)	-1.1177	0	8.88229	-29.5074	-182.967	51.5252	-0.558853	0	4.44115	0	0	61504
1534	Samsung Electronics	1.04109	127	6	-1.263265165412130E-01	Samsung Electronics(1.000000)	1.19163	0	30.1916	6.5334	0	165.533	0.534177	0	13.5342	0	0	208938
1535	SK Holdings	0.725164	127	12	9.862746190531880E-02	SK Holdings(1.000000)	-5.77156	0	15.2284	-57.9905	0	153.01	-6.87091	0	18.1291	0	0	106248
1536	S-Oil	1.29573	127	9	-3.873573943090080E-01	S-Oil(1.000000)	2.66156	0	11.6616	0.887187	0	3.88719	3.25302	0	14.253	0	0	27122
1537	GS Caltex	0.651395	128	1	2.404849539081970E-01	KIA Motor(0.691413); S-Oil(0.269453)	-8.36653	0	15.6335	-5.22908	0	9.77092	-17.4303	-13.4975	19.0722	0	0	38235
1538	Hanwha	0.145718	128	10	4.278060839918900E-01	Hanwha(1.000000)	-48.6941	0	8.30592	-191.359	0	32.6408	-14.5228	0	2.4772	0	0	35574
1539	Hyundai Motor	0.772593	128	5	1.866456660328640E-01	Hanwha(2.031862); KIA Motor(0.279221)	-7.04962	-2.96283	20.9875	-20.4666	0	69.5334	-2.95629	0	10.0437	0	0	84771
1540	KEPCO	1.10684	128	3	3.207235332626880E-01	SK Holdings(0.510617)	0.747902	0	7.7479	8.12008	-6.27211	77.848	25.7492	-257.526	9.22369	0	0	54252
1541	KIA Motor	0.460105	128	10	4.096570269548060E-01	KIA Motor(1.000000)	-17.2766	0	14.7234	-13.4974	0	11.5026	-21.0559	0	17.9441	0	0	44730
1542	KOGAS	1.42908	128	5	1.536549863866530E-02	KIA Motor(0.421980); SK Holdings(0.155634)	2.57451	0	8.57451	8.58169	0	28.5817	13.3016	-33.9182	10.3834	0	0	35411
1543	LG Electronics	0.450062	128	7	-4.341941131432700E-02	Hanwha(1.291402); KIA Motor(0.248103)	-18.1479	-0.472861	14.3792	-54.9938	0	45.0062	-9.34894	0	7.65106	0	0	57038
1544	Lotte Shopping	0.211572	128	5	1.708676182095030E-01	KIA Motor(0.481914); SK Holdings(0.048293)	-29.1718	0	7.82817	-48.0941	0	12.9059	-58.3437	-6.13648	9.51987	0	0	26687
1545	POSCO	0.962192	128	6	4.561971393240300E-01	POSCO(1.000000)	-0.378075	0	9.62192	-9.98118	0	254.019	-0.189038	0	4.81096	0	0	61504
1546	Samsung Electronics	1.50811	128	2	-2.318734840217390E-01	Hanwha(4.278825); POSCO(0.112997); SK Holdings(0.468464)	14.7351	0	43.7351	80.789	0	239.789	6.60539	0	19.6054	0	0	208938
1547	SK Holdings	0.722553	128	12	-8.759078655001090E-02	SK Holdings(1.000000)	-5.82638	0	15.1736	-58.5413	0	152.459	-6.93617	0	18.0638	0	0	106248
1548	S-Oil	2.24881	128	1	-3.873678222726270E-01	S-Oil(1.000000)	11.2393	0	20.2393	3.74644	0	6.74644	13.7369	0	24.7369	0	0	27122
1549	GS Caltex	0.543893	129	2	8.992906430546450E-02	KOGAS(0.191995); S-Oil(1.159069)	-10.9466	0	13.0534	-6.8416	0	8.1584	-22.8053	-6.23463	20.96	0	0	38235
1550	Hanwha	0.180567	129	3	4.940225658286380E-01	Hanwha(1.000000)	-46.7077	0	10.2923	-183.553	0	40.4471	-13.9304	0	3.06965	0	0	35574
1551	Hyundai Motor	0.927513	129	3	9.150774448320400E-02	Hanwha(2.024435); S-Oil(0.470237)	-2.2471	-3.13579	25.6171	-6.52383	0	83.4762	-0.942331	0	12.0577	0	0	84771
1552	KEPCO	1.4467	129	5	4.055444800240890E-02	KOGAS(1.532066)	3.12692	0	10.1269	33.9494	-76.193	33.7564	107.655	-296.333	52.3224	0	0	54252
1553	KIA Motor	0.494266	129	11	-5.479797186218080E-02	KOGAS(0.034759); Samsung Electronics(0.025043); S-Oil(1.410908)	-16.1835	0	15.8165	-12.6434	0	12.3566	-19.7236	0	19.2764	0	0	44730
1554	KOGAS	1.10166	129	10	3.629629249211530E-01	KOGAS(1.000000)	0.609977	0	6.60998	2.03326	0	22.0333	3.15155	0	34.1515	0	0	35411
1555	LG Electronics	0.534961	129	5	-3.618842399182010E-01	Hanwha(1.287956); S-Oil(0.413696)	-15.3463	-0.191548	17.4622	-46.5039	0	53.4961	-7.90566	0	9.09434	0	0	57038
1556	Lotte Shopping	0.208491	129	11	-3.913502321221300E-01	KOGAS(0.259005); Samsung Electronics(0.019621); S-Oil(0.494647)	-29.2858	0	7.71416	-48.2821	0	12.7179	-58.5717	0	15.4283	0	0	26687
1557	POSCO	1.45546	129	1	-5.055398839263930E-01	KOGAS(0.024138); Samsung Electronics(0.290274)	4.55457	0	14.5546	120.241	-304.784	79.4562	2.27728	0	7.27728	0	0	61504
1558	Samsung Electronics	1.71004	129	3	-4.351657525261010E-01	Samsung Electronics(1.000000)	20.5911	0	49.5911	112.896	0	271.896	9.23052	0	22.2305	0	0	208938
1559	SK Holdings	1.15166	129	7	-9.253554172711450E-02	KOGAS(0.575534); Samsung Electronics(0.410972)	3.18486	0	24.1849	32.0003	-118.578	124.423	3.7915	0	28.7915	0	0	106248
1560	S-Oil	1.12968	129	10	4.627180506398180E-01	S-Oil(1.000000)	1.16709	0	10.1671	0.38903	0	3.38903	1.42644	0	12.4264	0	0	27122
1561	GS Caltex	0.595435	130	8	3.368663647950170E-01	KOGAS(0.203032); S-Oil(1.144658)	-9.70955	0	14.2904	-6.06847	0	8.93153	-20.2282	-6.82545	22.9463	0	0	38235
1562	Hanwha	0.147999	130	12	5.029674334805660E-01	Hanwha(1.000000)	-48.564	0	8.43596	-190.848	0	33.1518	-14.484	0	2.51599	0	0	35574
1563	Hyundai Motor	0.69756	130	4	2.724199373285680E-01	Hyundai Motor(1.000000)	-9.37564	0	21.6244	-27.2196	0	62.7804	-3.93172	0	9.06828	0	0	84771
1564	KEPCO	1.05759	130	4	2.113010064564710E-01	KEPCO(1.000000)	0.403131	0	7.40313	4.37685	0	80.3769	13.8792	0	254.879	0	0	54252
1565	KIA Motor	0.518045	130	11	-6.352072571478010E-02	Hyundai Motor(0.108599); KOGAS(0.067720); S-Oil(1.221367)	-15.4225	0	16.5775	-12.0489	0	12.9511	-18.7962	0	20.2038	0	0	44730
1566	KOGAS	1.1405	130	9	1.362719437471870E-01	KOGAS(1.000000)	0.842996	0	6.843	2.80999	0	22.81	4.35548	0	35.3555	0	0	35411
1567	LG Electronics	0.432857	130	5	-2.032473802909190E-01	Hyundai Motor(0.617070); KOGAS(0.041538); Samsung Electronics(0.015591)	-18.7157	0	14.2843	-56.7143	0	43.2857	-9.64143	0	7.35857	0	0	57038
1568	Lotte Shopping	0.210591	130	3	-1.000860773320710E-01	Hyundai Motor(0.081997); KOGAS(0.277266); S-Oil(0.365673)	-29.2082	0	7.79185	-48.154	0	12.846	-58.4163	0	15.5837	0	0	26687
1569	POSCO	1.21787	130	11	-6.280450530608170E-01	Samsung Electronics(0.269147); SK Holdings(0.049592)	2.17867	0	12.1787	57.5168	-250.87	70.647	1.08933	0	6.08933	0	0	61504
1570	Samsung Electronics	1.45158	130	3	2.502162849369860E-01	Samsung Electronics(1.000000)	13.0957	0	42.0957	71.8008	0	230.801	5.8705	0	18.8705	0	0	208938
1571	SK Holdings	0.814974	130	9	5.025643590189870E-02	SK Holdings(1.000000)	-3.88555	0	17.1145	-39.0405	0	171.96	-4.62565	0	20.3743	0	0	106248
1572	S-Oil	1.2523	130	9	-2.701462784076120E-01	S-Oil(1.000000)	2.2707	0	11.2707	0.7569	0	3.7569	2.7753	0	13.7753	0	0	27122
1573	GS Caltex	0.699902	131	1	-3.243238279755980E-01	KIA Motor(0.675992); S-Oil(0.294886)	-7.20236	0	16.7976	-4.50148	0	10.4985	-15.0049	-14.5026	20.4925	0	0	38235
1574	Hanwha	0.135311	131	6	1.352551851243830E-01	Hanwha(1.000000)	-49.2873	0	7.71273	-193.69	0	30.3097	-14.6997	0	2.30029	0	0	35574
1575	Hyundai Motor	0.734188	131	10	7.713937071674220E-01	Hanwha(2.079362); KIA Motor(0.241443)	-8.24018	-2.81555	19.9443	-23.9231	0	66.0769	-3.45556	0	9.54444	0	0	84771
1576	KEPCO	1.04106	131	6	1.426207366268490E-01	KEPCO(1.000000)	0.287395	0	7.2874	3.12029	0	79.1203	9.8946	0	250.895	0	0	54252
1577	KIA Motor	0.505646	131	6	7.799104974704200E-01	KIA Motor(1.000000)	-15.8193	0	16.1807	-12.3588	0	12.6412	-19.2798	0	19.7202	0	0	44730
1578	KOGAS	1.27323	131	6	9.188744716995270E-01	KOGAS(1.000000)	1.6394	0	7.6394	5.46468	0	25.4647	8.47025	0	39.4702	0	0	35411
1579	LG Electronics	0.43092	131	11	2.374984962335090E-01	Hanwha(1.331572); KIA Motor(0.216156)	-18.7797	-0.452748	13.7676	-56.908	0	43.092	-9.67436	0	7.32564	0	0	57038
1580	Lotte Shopping	0.214936	131	2	3.353599049945570E-01	Hanwha(0.099807); KIA Motor(0.335562); KOGAS(0.229498)	-29.0474	0	7.95264	-47.8889	0	13.1111	-58.0947	0	15.9053	0	0	26687
1581	POSCO	0.967339	131	6	4.891040873606690E-01	POSCO(1.000000)	-0.32661	0	9.67339	-8.62251	0	255.377	-0.163305	0	4.83669	0	0	61504
1582	Samsung Electronics	1.51929	131	5	-1.627591067516740E-01	Hanwha(5.301977); KEPCO(0.024151); POSCO(0.309171)	15.0594	0	44.0594	82.5672	0	241.567	6.75078	0	19.7508	0	0	208938
1583	SK Holdings	0.983551	131	1	7.086659005217720E-02	Hanwha(1.903342); KEPCO(0.069659); POSCO(0.565156)	-0.34543	0	20.6546	-3.47075	0	207.529	-0.411226	0	24.5888	0	0	106248
1584	S-Oil	2.20787	131	5	3.439040269051330E-01	S-Oil(1.000000)	10.8709	0	19.8709	3.62362	0	6.62362	13.2866	0	24.2866	0	0	27122
1585	GS Caltex	1.03917	132	2	-4.317795557457680E-01	LG Electronics(0.204573); S-Oil(0.979521)	0.940157	0	24.9402	0.587598	0	15.5876	1.95866	-23.3833	28.5753	0	0	38235
1586	Hanwha	0.20105	132	7	-5.756958512868940E-02	Samsung Electronics(0.170261)	-45.5401	-3.83542	7.62444	-178.965	-3.23227	41.803	-13.5821	0	3.41785	0	0	35574
1587	Hyundai Motor	0.747167	132	3	-4.663892844872400E-01	LG Electronics(1.195653); Samsung Electronics(0.079322)	-7.83781	-3.84607	19.3161	-22.7549	0	67.2451	-3.28682	0	9.71318	0	0	84771
1588	KEPCO	1.66109	132	8	-8.582516503439100E-02	Samsung Electronics(0.259656)	4.62763	0	11.6276	50.2428	-62.4914	63.7515	159.323	-395.11	5.21239	0	0	54252
1589	KIA Motor	0.815284	132	1	1.896818050687050E-01	LG Electronics(0.328638); S-Oil(0.958083)	-5.91092	0	26.0891	-4.61791	0	20.3821	-7.20394	-2.97309	28.823	0	0	44730
1590	KOGAS	1.35111	132	7	-5.206348283239140E-01	LG Electronics(0.538893); Samsung Electronics(0.022368)	2.10668	0	8.10668	7.02227	0	27.0223	10.8845	-37.7753	4.10918	0	0	35411
1591	LG Electronics	0.399528	132	10	-1.635255150757000E-01	LG Electronics(1.000000)	-19.8156	0	13.1844	-60.0472	0	39.9528	-10.208	0	6.79198	0	0	57038
1592	Lotte Shopping	0.265002	132	3	-2.386518545032100E-01	LG Electronics(0.362696); S-Oil(0.221205)	-27.1949	0	9.80508	-44.8349	0	16.1651	-54.3898	-11.0073	8.60281	0	0	26687
1593	POSCO	1.31819	132	2	3.468155885775460E-01	Samsung Electronics(0.294365)	3.18192	0	13.1819	84.0028	-275.729	72.2733	1.59096	-0.681824	5.90914	0	0	61504
1594	Samsung Electronics	1.54417	132	11	-2.980323828262420E-01	Samsung Electronics(1.000000)	15.7809	0	44.7809	86.5229	0	245.523	7.0742	0	20.0742	0	0	208938
1595	SK Holdings	1.08437	132	5	-1.419400428714890E-01	Samsung Electronics(0.508514)	1.77174	0	22.7717	17.8018	-103.95	124.852	2.10921	-16.9012	10.208	0	0	106248
1596	S-Oil	2.52311	132	7	1.774901481191430E-01	S-Oil(1.000000)	13.708	0	22.708	4.56934	0	7.56934	16.7542	0	27.7542	0	0	27122
1597	GS Caltex	0.793033	133	1	1.678694972003430E-01	Lotte Shopping(0.558134); S-Oil(0.860559)	-4.96722	0	19.0328	-3.10451	0	11.8955	-10.3484	-13.1068	26.5449	0	0	38235
1598	Hanwha	0.134819	133	6	1.031747715241810E-01	Hanwha(1.000000)	-49.3153	0	7.6847	-193.8	0	30.1995	-14.7081	0	2.29193	0	0	35574
1599	Hyundai Motor	0.751839	133	11	1.085494663245200E-01	Hanwha(2.137120); KIA Motor(0.195509)	-7.693	-2.88324	20.4238	-22.3345	0	67.6655	-3.2261	0	9.7739	0	0	84771
1600	KEPCO	1.67422	133	7	-1.700147286776780E-01	Hanwha(1.525046)	4.71952	0	11.7195	51.2405	-81.1849	46.0557	162.486	-399.991	3.4953	0	0	54252
1601	KIA Motor	0.63946	133	11	-3.284359707370750E-01	KIA Motor(1.000000)	-11.5373	0	20.4627	-9.01349	0	15.9865	-14.061	0	24.939	0	0	44730
1602	KOGAS	1.35938	133	2	6.298784582480120E-02	Hanwha(0.783834); Lotte Shopping(0.282043)	2.15626	0	8.15626	7.18753	0	27.1875	11.1407	-36.0787	6.06196	0	0	35411
1603	LG Electronics	0.445369	133	5	1.419721194341650E-01	Hanwha(1.381241); KIA Motor(0.176654)	-18.3028	-0.467929	14.2292	-55.4631	0	44.5369	-9.42873	0	7.57127	0	0	57038
1604	Lotte Shopping	0.204371	133	6	6.441512351680010E-01	Lotte Shopping(1.000000)	-29.4383	0	7.56172	-48.5334	0	12.4666	-58.8766	0	15.1234	0	0	26687
1605	POSCO	1.32861	133	1	-1.554974031303250E-01	Hanwha(1.728903)	3.2861	0	13.2861	86.753	-298.541	52.212	1.64305	-2.68053	3.96252	0	0	61504
1606	Samsung Electronics	1.55637	133	11	-6.986260517594600E-01	Hanwha(5.873334)	16.1348	0	45.1348	88.4632	-70.0914	177.372	7.23284	-6.77159	13.4613	0	0	208938
1607	SK Holdings	1.09294	133	5	-1.278700576634520E-01	Hanwha(2.986676)	1.9517	0	22.9517	19.6099	-140.414	90.1962	2.32345	-20.4782	6.84524	0	0	106248
1608	S-Oil	1.91249	133	1	3.386210412746380E-01	S-Oil(1.000000)	8.21245	0	17.2125	2.73748	0	5.73748	10.0374	0	21.0374	0	0	27122
1609	GS Caltex	0.625849	134	11	-8.717801933711970E-01	KIA Motor(0.854795)	-8.97963	-3.00407	12.0163	-5.61227	0	9.38773	-18.7076	-16.6476	14.6449	0	0	38235
1610	Hanwha	0.153397	134	11	-2.151324302408590E-01	Samsung Electronics(0.170261)	-48.2564	-2.92633	5.81727	-189.639	-2.46615	31.8947	-14.3923	0	2.60774	0	0	35574
1611	Hyundai Motor	0.759126	134	5	-6.364157774683840E-03	KIA Motor(0.263795); Samsung Electronics(0.349249)	-7.46709	-7.89189	15.641	-21.6787	0	68.3213	-3.13136	0	9.86864	0	0	84771
1612	KEPCO	1.0289	134	4	8.057036811580650E-02	KEPCO(1.000000)	0.202328	0	7.20233	2.1967	0	78.1967	6.96585	0	247.966	0	0	54252
1613	KIA Motor	0.439297	134	10	-2.214563747064980E-01	KIA Motor(1.000000)	-17.9425	0	14.0575	-14.0176	0	10.9824	-21.8674	0	17.1326	0	0	44730
1614	KOGAS	1.20162	134	7	-5.858355264239040E-02	Lotte Shopping(0.600987); Samsung Electronics(0.092719)	1.2097	0	7.2097	4.03233	0	24.0323	6.25011	-27.7464	9.50369	0	0	35411
1615	LG Electronics	0.441506	134	7	-5.712872103475680E-02	KIA Motor(0.239968); Samsung Electronics(0.221617)	-18.4303	-3.62439	10.9453	-55.8494	0	44.1506	-9.49441	0	7.50559	0	0	57038
1616	Lotte Shopping	0.181764	134	9	5.252647389556410E-01	Lotte Shopping(1.000000)	-30.2747	0	6.72527	-49.9124	0	11.0876	-60.5495	0	13.4505	0	0	26687
1617	POSCO	1.00539	134	2	2.066602674039370E-01	KEPCO(0.002125); Samsung Electronics(0.293813)	0.05395	0	10.054	1.42427	-210.219	55.2056	0.026975	0	5.02698	0	0	61504
1618	Samsung Electronics	1.17816	134	4	-6.262412286180330E-01	Samsung Electronics(1.000000)	5.16677	0	34.1668	28.3282	0	187.328	2.31614	0	15.3161	0	0	208938
1619	SK Holdings	0.82318	134	11	-7.258831614353640E-02	KEPCO(0.052425); Samsung Electronics(0.494902)	-3.71321	0	17.2868	-37.3089	-76.8825	96.8085	-4.42049	0	20.5795	0	0	106248
1620	S-Oil	2.21973	134	2	-2.246074142962270E-01	KIA Motor(0.606349)	10.9776	-11.4538	8.52376	3.65919	0	6.65919	13.417	-14.0287	10.3883	0	0	27122
1621	GS Caltex	0.493509	135	4	-5.144767470749930E-02	GS Caltex(1.000000)	-12.1558	0	11.8442	-7.59737	0	7.40263	-25.3246	0	24.6754	0	0	38235
1622	Hanwha	0.131856	135	10	-1.299149844756570E-01	Samsung Electronics(0.170261)	-49.4842	-2.5154	5.00038	-194.464	-2.11984	27.4159	-14.7585	0	2.24155	0	0	35574
1623	Hyundai Motor	0.665316	135	1	-3.319911196582540E-01	KIA Motor(0.231819); Samsung Electronics(0.356095)	-10.3752	-6.91663	13.7082	-30.1216	0	59.8784	-4.3509	0	8.6491	0	0	84771
1624	KEPCO	1.0894	135	11	3.402602521084350E-01	Samsung Electronics(0.259656)	0.62581	0	7.62581	6.79451	-40.984	41.8105	21.5457	-259.127	3.41847	0	0	54252
1625	KIA Motor	0.438117	135	9	4.870056925338840E-01	KIA Motor(1.000000)	-17.9803	0	14.0197	-14.0471	0	10.9529	-21.9135	0	17.0865	0	0	44730
1626	KOGAS	1.09399	135	8	-8.034249426124520E-01	GS Caltex(0.245214); Samsung Electronics(0.124607)	0.563953	0	6.56395	1.87984	0	21.8798	2.91376	-26.2225	7.69127	0	0	35411
1627	LG Electronics	0.389634	135	8	-1.618804791159800E-01	KIA Motor(0.212345); Samsung Electronics(0.227531)	-20.1421	-3.19856	9.65935	-61.0366	0	38.9634	-10.3762	0	6.62377	0	0	57038
1628	Lotte Shopping	0.178221	135	5	2.652133148890390E-01	GS Caltex(0.439423); Samsung Electronics(0.047314)	-30.4058	0	6.59417	-50.1285	0	10.8715	-60.8117	-1.72249	11.4659	0	0	26687
1629	POSCO	0.864517	135	11	-4.326882315670950E-01	Samsung Electronics(0.294365)	-1.35483	0	8.64517	-35.7675	-180.833	47.3994	-0.677414	-0.447164	3.87542	0	0	61504
1630	Samsung Electronics	1.01272	135	12	-1.805901731371670E-02	Samsung Electronics(1.000000)	0.368899	0	29.3689	2.02258	0	161.023	0.165368	0	13.1654	0	0	208938
1631	SK Holdings	0.711167	135	9	1.083122503523350E+00	Samsung Electronics(0.508514)	-6.06549	0	14.9345	-60.9437	-68.174	81.8823	-7.22082	-11.0844	6.69478	0	0	106248
1632	S-Oil	1.55986	135	11	-3.743243474079100E-01	S-Oil(1.000000)	5.03877	0	14.0388	1.67959	0	4.67959	6.1585	0	17.1585	0	0	27122
1633	GS Caltex	0.608258	136	1	-7.673924374104590E-02	KIA Motor(0.854795)	-9.40181	-2.91964	11.6785	-5.87613	0	9.12387	-19.5871	-16.1797	14.2332	0	0	38235
1634	Hanwha	0.162115	136	7	3.233193319538280E-02	Samsung Electronics(0.170261)	-47.7595	-3.09265	6.14788	-187.686	-2.6063	33.7074	-14.2441	0	2.75595	0	0	35574
1635	Hyundai Motor	0.680687	136	6	-1.605410557279430E-01	Hyundai Motor(1.000000)	-9.89871	0	21.1013	-28.7382	0	61.2618	-4.15107	0	8.84893	0	0	84771
1636	KEPCO	1.19622	136	7	-4.085783827924210E-02	SK Holdings(0.510617)	1.37353	0	8.37353	14.9126	-6.77857	84.134	47.2887	-278.32	9.96849	0	0	54252
1637	KIA Motor	0.42695	136	12	1.053479575260140E-01	KIA Motor(1.000000)	-18.3376	0	13.6624	-14.3263	0	10.6737	-22.349	0	16.651	0	0	44730
1638	KOGAS	1.10896	136	9	2.768958901480270E-01	KOGAS(1.000000)	0.653763	0	6.65376	2.17921	0	22.1792	3.37777	0	34.3778	0	0	35411
1639	LG Electronics	0.412896	136	8	2.059985975401010E-01	Hyundai Motor(0.478989); KIA Motor(0.114333); Samsung Electronics(0.054176)	-19.3744	0	13.6256	-58.7104	0	41.2896	-9.98076	0	7.01924	0	0	57038
1640	Lotte Shopping	0.174253	136	6	7.070771750964030E-03	Lotte Shopping(1.000000)	-30.5526	0	6.44736	-50.3706	0	10.6294	-61.1053	0	12.8947	0	0	26687
1641	POSCO	1.05412	136	11	-2.598082710721970E-01	Samsung Electronics(0.271585); SK Holdings(0.044797)	0.541165	0	10.5412	14.2868	-217.139	61.1481	0.270582	0	5.27058	0	0	61504
1642	Samsung Electronics	1.24512	136	9	-2.350957144406870E-01	Samsung Electronics(1.000000)	7.10858	0	36.1086	38.9746	0	197.975	3.1866	0	16.1866	0	0	208938
1643	SK Holdings	0.780898	136	9	2.563091033831490E-01	SK Holdings(1.000000)	-4.60114	0	16.3989	-46.2305	0	164.769	-5.47755	0	19.5224	0	0	106248
1644	S-Oil	2.15734	136	8	7.362449919739420E-02	KIA Motor(0.606349)	10.416	-11.1319	8.28418	3.47201	0	6.47201	12.7307	-13.6344	10.0963	0	0	27122
1645	GS Caltex	0.520904	137	5	2.280811526071960E-01	KIA Motor(0.592217); S-Oil(0.433049)	-11.4983	0	12.5017	-7.18644	0	7.81356	-23.9548	-10.7936	15.2516	0	0	38235
1646	Hanwha	0.264265	137	1	4.951935019631160E-02	Hanwha(1.000000)	-41.9369	0	15.0631	-164.805	0	59.1954	-12.5075	0	4.49251	0	0	35574
1647	Hyundai Motor	0.876838	137	1	-9.516433032500060E-02	Hanwha(0.362024); LG Electronics(1.260429)	-3.81801	-2.75863	24.4234	-11.0845	0	78.9155	-1.6011	0	11.3989	0	0	84771
1648	KEPCO	1.12899	137	10	-4.636536771390570E-01	KEPCO(1.000000)	0.902921	0	7.90292	9.80315	0	85.8031	31.0863	0	272.086	0	0	54252
1649	KIA Motor	0.429564	137	12	1.283064340089080E-01	KIA Motor(1.000000)	-18.254	0	13.746	-14.2609	0	10.7391	-22.247	0	16.753	0	0	44730
1650	KOGAS	1.11893	137	4	4.283789476827420E-01	KOGAS(1.000000)	0.713601	0	6.7136	2.37867	0	22.3787	3.68694	0	34.6869	0	0	35411
1651	LG Electronics	0.456077	137	9	-8.473649812897860E-02	LG Electronics(1.000000)	-17.9494	0	15.0506	-54.3923	0	45.6077	-9.24668	0	7.75332	0	0	57038
1652	Lotte Shopping	0.186819	137	9	3.905346944235410E-01	Lotte Shopping(1.000000)	-30.0877	0	6.9123	-49.604	0	11.396	-60.1754	0	13.8246	0	0	26687
1653	POSCO	1.66677	137	2	-5.572088278350380E-02	Hanwha(0.077294); LG Electronics(1.030091)	6.66773	0	16.6677	176.028	-388.473	51.5556	3.33387	0	8.33387	0	0	61504
1654	Samsung Electronics	2.15102	137	2	-2.583246496936440E-01	Hanwha(1.276807); LG Electronics(2.866806)	33.3797	0	62.3797	183.013	-135.683	206.33	14.9633	0	27.9633	0	0	208938
1655	SK Holdings	1.26318	137	8	-3.045662836922800E-01	KOGAS(0.573648); LG Electronics(1.506619)	5.5267	0	26.5267	55.5301	-184.979	81.551	6.5794	0	31.5794	0	0	106248
1656	S-Oil	1.11895	137	12	-4.284530302358460E-01	S-Oil(1.000000)	1.07059	0	10.0706	0.356863	0	3.35686	1.3085	0	12.3085	0	0	27122
1657	GS Caltex	0.504054	138	6	-1.378033785332650E-01	GS Caltex(1.000000)	-11.9027	0	12.0973	-7.43919	0	7.56081	-24.7973	0	25.2027	0	0	38235
1658	Hanwha	0.136447	138	6	1.608101435856550E-01	Hanwha(1.000000)	-49.2225	0	7.77749	-193.436	0	30.5642	-14.6804	0	2.3196	0	0	35574
1659	Hyundai Motor	0.756036	138	4	7.220726087935810E-01	GS Caltex(0.189390); Hanwha(2.179391)	-7.56289	-4.19581	19.2413	-21.9568	0	68.0432	-3.17153	0	9.82846	0	0	84771
1660	KEPCO	1.35429	138	2	-2.035690372306020E-01	POSCO(0.246895); Samsung Electronics(0.186979)	2.48003	0	9.48004	26.9261	0	102.926	85.384	-322.008	4.37566	0	0	54252
1661	KIA Motor	0.609064	138	7	2.821682897181870E-01	GS Caltex(0.917536); Hanwha(0.271209)	-12.51	-6.28101	13.209	-9.7734	0	15.2266	-15.2465	0	23.7535	0	0	44730
1662	KOGAS	1.30009	138	5	-2.882791284794610E-02	Lotte Shopping(0.614617); Samsung Electronics(0.090978)	1.80056	0	7.80056	6.00187	0	26.0019	9.3029	-30.0203	10.2826	0	0	35411
1663	LG Electronics	0.446872	138	2	8.287205794321340E-02	GS Caltex(0.170750); Hanwha(1.419839)	-18.2532	-1.63838	13.1084	-55.3128	0	44.6872	-9.40317	0	7.59683	0	0	57038
1664	Lotte Shopping	0.192299	138	6	-4.160208231637980E-01	Lotte Shopping(1.000000)	-29.8849	0	7.11507	-49.2697	0	11.7303	-59.7699	0	14.2301	0	0	26687
1665	POSCO	0.986555	138	10	-5.553187358215620E-01	POSCO(1.000000)	-0.13445	0	9.86555	-3.54948	0	260.451	-0.067225	0	4.93278	0	0	61504
1666	Samsung Electronics	1.29911	138	11	4.454774268208050E-01	Samsung Electronics(1.000000)	8.67422	0	37.6742	47.5587	0	206.559	3.88844	0	16.8884	0	0	208938
1667	SK Holdings	0.888223	138	5	1.711483762173330E-01	POSCO(0.412613); Samsung Electronics(0.387056)	-2.34732	0	18.6527	-23.585	0	187.415	-2.79443	-13.6335	8.5721	0	0	106248
1668	S-Oil	1.78775	138	5	3.286135281366640E-01	GS Caltex(0.709350)	7.08979	-7.50857	8.58122	2.36326	0	5.36326	8.6653	-1.78775	17.8775	0	0	27122
1669	GS Caltex	0.549832	139	1	-1.107412127283340E-01	KIA Motor(0.592938); S-Oil(0.431859)	-10.804	0	13.196	-6.75251	0	8.24748	-22.5084	-11.393	16.0986	0	0	38235
1670	Hanwha	0.177075	139	5	-1.580741321623010E-01	POSCO(0.015472); Samsung Electronics(0.165707)	-46.9067	-3.39425	6.69905	-184.335	0	39.6649	-13.9897	0	3.01028	0	0	35574
1671	Hyundai Motor	0.77261	139	9	-4.233767569904170E-02	Hyundai Motor(1.000000)	-7.04908	0	23.9509	-20.4651	0	69.5349	-2.95606	0	10.0439	0	0	84771
1672	KEPCO	1.21504	139	1	3.618836935331570E-01	POSCO(0.046418); SK Holdings(0.483747)	1.50528	0	8.50529	16.3431	0	92.3431	51.8248	-282.99	9.83461	0	0	54252
1673	KIA Motor	0.452868	139	9	3.247341514004930E-01	KIA Motor(1.000000)	-17.5082	0	14.4918	-13.6783	0	11.3217	-21.3381	0	17.6619	0	0	44730
1674	KOGAS	1.07578	139	4	-2.770069848242560E-01	KOGAS(1.000000)	0.45469	0	6.45469	1.51563	0	21.5156	2.34923	0	33.3492	0	0	35411
1675	LG Electronics	0.462493	139	1	4.542880606124890E-01	Hyundai Motor(0.472689); KIA Motor(0.120737); Samsung Electronics(0.055361)	-17.7377	0	15.2623	-53.7507	0	46.2493	-9.13763	0	7.86237	0	0	57038
1676	Lotte Shopping	0.192501	139	7	-4.403163347149930E-01	KIA Motor(0.353291); KOGAS(0.233373); Samsung Electronics(0.012541)	-29.8775	0	7.12255	-49.2574	0	11.7426	-59.7549	0	14.2451	0	0	26687
1677	POSCO	0.907093	139	6	2.263663613519890E-01	POSCO(1.000000)	-0.92907	0	9.07093	-24.5275	0	239.473	-0.464535	0	4.53547	0	0	61504
1678	Samsung Electronics	1.36483	139	3	5.566792666299970E-01	Samsung Electronics(1.000000)	10.5802	0	39.5802	58.0087	0	217.009	4.74285	0	17.7429	0	0	208938
1679	SK Holdings	0.795795	139	9	1.639317607415130E-01	SK Holdings(1.000000)	-4.28829	0	16.7117	-43.0872	0	167.913	-5.10511	0	19.8949	0	0	106248
1680	S-Oil	1.18435	139	9	-2.624082786849890E-02	S-Oil(1.000000)	1.65915	0	10.6591	0.553048	0	3.55305	2.02784	0	13.0278	0	0	27122
1681	GS Caltex	0.511307	140	12	-4.487190341210820E-01	Lotte Shopping(0.392922); S-Oil(1.023121)	-11.7286	0	12.2714	-7.33039	0	7.66961	-24.4346	-8.45058	17.1148	0	0	38235
1682	Hanwha	0.157437	140	9	-1.239006225606680E-01	Hanwha(1.000000)	-48.0261	0	8.97392	-188.734	0	35.2659	-14.3236	0	2.67643	0	0	35574
1683	Hyundai Motor	0.683481	140	12	-1.886723147939340E-01	Hyundai Motor(1.000000)	-9.81209	0	21.1879	-28.4867	0	61.5133	-4.11475	0	8.88525	0	0	84771
1684	KEPCO	1.23243	140	8	8.543994040533450E-02	SK Holdings(0.510617)	1.627	0	8.627	17.6646	-6.98376	86.6808	56.0153	-286.745	10.2702	0	0	54252
1685	KIA Motor	0.445027	140	10	5.532396801075470E-01	Hyundai Motor(0.077655); Lotte Shopping(0.236067); S-Oil(1.174220)	-17.7591	0	14.2409	-13.8743	0	11.1257	-21.644	0	17.356	0	0	44730
1686	KOGAS	1.30659	140	11	3.985056190026040E-01	KOGAS(1.000000)	1.83957	0	7.83957	6.13189	0	26.1319	9.50442	0	40.5044	0	0	35411
1687	LG Electronics	0.426375	140	8	9.146456465055580E-02	Hyundai Motor(0.614922); Lotte Shopping(0.097179); SK Holdings(0.021808)	-18.9296	0	14.0704	-57.3625	0	42.6375	-9.75163	0	7.24837	0	0	57038
1688	Lotte Shopping	0.187172	140	10	-3.205753060575470E-01	Lotte Shopping(1.000000)	-30.0746	0	6.92538	-49.5825	0	11.4175	-60.1492	0	13.8508	0	0	26687
1689	POSCO	1.04438	140	9	-1.742783465855820E-01	POSCO(1.000000)	0.443764	0	10.4438	11.7154	0	275.715	0.221882	0	5.22188	0	0	61504
1690	Samsung Electronics	1.64125	140	7	-6.652201053655590E-03	Hanwha(4.309948); POSCO(0.113296); SK Holdings(0.457870)	18.5962	0	47.5962	101.958	0	260.958	8.33622	0	21.3362	0	0	208938
1691	SK Holdings	0.804536	140	9	1.066660131771050E-01	SK Holdings(1.000000)	-4.10474	0	16.8953	-41.2429	0	169.757	-4.8866	0	20.1134	0	0	106248
1692	S-Oil	1.03716	140	12	-1.300602569540860E-01	S-Oil(1.000000)	0.334419	0	9.33442	0.111473	0	3.11147	0.408734	0	11.4087	0	0	27122
1693	GS Caltex	0.526849	141	5	-3.347693675638120E-01	KOGAS(0.175125); S-Oil(1.181095)	-11.3556	0	12.6444	-7.09727	0	7.90273	-23.6576	-6.03925	20.3032	0	0	38235
1694	Hanwha	0.14161	141	12	3.100205938613010E-01	Hanwha(1.000000)	-48.9282	0	8.07179	-192.279	0	31.7207	-14.5926	0	2.40738	0	0	35574
1695	Hyundai Motor	0.747072	141	5	1.625422603490530E-01	Hanwha(2.079174); S-Oil(0.398440)	-7.84076	-2.52574	20.6335	-22.7635	0	67.2365	-3.28806	0	9.71194	0	0	84771
1696	KEPCO	1.53636	141	7	-2.174658303175070E-02	KOGAS(1.532066)	3.75455	0	10.7545	40.7637	-80.9152	35.8485	129.264	-314.699	55.5652	0	0	54252
1697	KIA Motor	0.461779	141	5	-1.615535054523930E-01	Hanwha(0.191855); KOGAS(0.049825); S-Oil(1.332520)	-17.2231	0	14.7769	-13.4555	0	11.5445	-20.9906	0	18.0094	0	0	44730
1698	KOGAS	1.16994	141	4	5.966450222243650E-01	KOGAS(1.000000)	1.01964	0	7.01964	3.39879	0	23.3988	5.26812	0	36.2681	0	0	35411
1699	LG Electronics	0.434501	141	3	-3.565253390097540E-01	Hanwha(1.333872); S-Oil(0.353471)	-18.6615	-0.155578	14.183	-56.5499	0	43.4501	-9.61348	0	7.38652	0	0	57038
1700	Lotte Shopping	0.200053	141	3	-4.785734835946030E-02	Hanwha(0.154377); KOGAS(0.249505); S-Oil(0.455717)	-29.598	0	7.40195	-48.7968	0	12.2032	-59.1961	0	14.8039	0	0	26687
1701	POSCO	1.38722	141	8	2.174692052174640E-01	Hanwha(1.647382); KOGAS(0.081897)	3.8722	0	13.8722	102.226	-312.054	54.1724	1.9361	0	6.9361	0	0	61504
1702	Samsung Electronics	1.62752	141	1	2.177211414645600E-01	Hanwha(5.667079); KOGAS(0.207205)	18.198	0	47.198	99.7751	-74.1629	184.612	8.15771	0	21.1577	0	0	208938
1703	SK Holdings	1.11835	141	1	1.662348274207380E-01	Hanwha(2.376328); KOGAS(0.613157)	2.48536	0	23.4854	24.972	-146.246	89.726	2.95876	0	27.9588	0	0	106248
1704	S-Oil	1.07387	141	12	-2.577641622368870E-01	S-Oil(1.000000)	0.664811	0	9.66481	0.221604	0	3.2216	0.812547	0	11.8125	0	0	27122
1705	GS Caltex	0.589052	142	8	-2.817642278804750E-01	KIA Motor(0.688767); S-Oil(0.273816)	-9.86274	0	14.1373	-6.16421	0	8.83579	-20.5474	-12.2057	17.2469	0	0	38235
1706	Hanwha	0.133137	142	9	-9.388344388655650E-02	Samsung Electronics(0.170261)	-49.4112	-2.53985	5.04898	-194.177	-2.14044	27.6823	-14.7367	0	2.26334	0	0	35574
1707	Hyundai Motor	0.666956	142	9	-3.376528404916620E-01	KIA Motor(0.243767); Samsung Electronics(0.353537)	-10.3244	-6.93369	13.742	-29.9739	0	60.0261	-4.32957	0	8.67043	0	0	84771
1708	KEPCO	1.09999	142	3	-1.502722232850670E-01	Samsung Electronics(0.259656)	0.699928	0	7.69993	7.59922	-41.3824	42.2168	24.0975	-261.646	3.45169	0	0	54252
1709	KIA Motor	0.417669	142	4	-1.114351066253310E-02	KIA Motor(1.000000)	-18.6346	0	13.3654	-14.5583	0	10.4417	-22.7109	0	16.2891	0	0	44730
1710	KOGAS	1.10219	142	2	3.593871738632160E-01	KIA Motor(0.226209); Samsung Electronics(0.121053)	0.613141	0	6.61314	2.0438	0	22.0438	3.1679	-28.8739	5.29395	0	0	35411
1711	LG Electronics	0.389583	142	11	1.048492162452020E-01	KIA Motor(0.222712); Samsung Electronics(0.225311)	-20.1438	-3.19815	9.6581	-61.0417	0	38.9583	-10.3771	0	6.62291	0	0	57038
1712	Lotte Shopping	0.179013	142	11	-8.673201515548360E-02	KIA Motor(0.404139); Samsung Electronics(0.041208)	-30.3765	0	6.62347	-50.0802	0	10.9198	-60.7531	-6.1161	7.13085	0	0	26687
1713	POSCO	0.87292	142	5	-2.115783708561830E-01	Samsung Electronics(0.294365)	-1.2708	0	8.7292	-33.5492	-182.591	47.8601	-0.635401	-0.45151	3.91309	0	0	61504
1714	Samsung Electronics	1.02256	142	12	5.929261843627420E-02	Samsung Electronics(1.000000)	0.654347	0	29.6543	3.58763	0	162.588	0.293328	0	13.2933	0	0	208938
1715	SK Holdings	0.718079	142	10	-1.645638582284100E-01	Samsung Electronics(0.508514)	-5.92033	0	15.0797	-59.4853	-68.8366	82.6782	-7.04802	-11.1921	6.75985	0	0	106248
1716	S-Oil	2.00118	142	1	1.052137468980940E-01	S-Oil(1.000000)	9.01062	0	18.0106	3.00354	0	6.00354	11.013	0	22.013	0	0	27122
1717	GS Caltex	0.505899	143	7	-1.858587174451670E-01	LG Electronics(0.103727); S-Oil(1.191602)	-11.8584	0	12.1416	-7.41152	0	7.58848	-24.7051	-11.3837	13.9113	0	0	38235
1718	Hanwha	0.135444	143	4	1.329756923323010E-01	Hanwha(1.000000)	-49.2797	0	7.72028	-193.661	0	30.3394	-14.6975	0	2.30254	0	0	35574
1719	Hyundai Motor	0.672047	143	6	2.012431593079880E-01	Hanwha(0.541376); LG Electronics(1.148569)	-10.1665	-2.11434	18.7191	-29.5157	0	60.4843	-4.26338	0	8.73662	0	0	84771
1720	KEPCO	1.25879	143	7	-1.537822886907630E-01	SK Holdings(0.510617)	1.8115	0	8.8115	19.6677	-7.13312	88.5346	62.3674	-292.878	10.4899	0	0	54252
1721	KIA Motor	0.431793	143	8	-4.730851643604400E-01	LG Electronics(0.181281); S-Oil(1.267978)	-18.1826	0	13.8174	-14.2052	0	10.7948	-22.1601	-1.57462	15.2653	0	0	44730
1722	KOGAS	1.28943	143	3	1.165233294427410E-01	LG Electronics(0.584768); SK Holdings(0.019360)	1.73658	0	7.73658	5.78861	0	25.7886	8.97235	-35.7612	4.21113	0	0	35411
1723	LG Electronics	0.383601	143	12	-1.250993645714630E-02	LG Electronics(1.000000)	-20.3412	0	12.6588	-61.6399	0	38.3601	-10.4788	0	6.52122	0	0	57038
1724	Lotte Shopping	0.193553	143	3	-1.717942548345510E-01	LG Electronics(0.275906); S-Oil(0.403727)	-29.8385	0	7.16146	-49.1933	0	11.8067	-59.6771	-8.03957	6.28334	0	0	26687
1725	POSCO	1.24046	143	7	-1.460644782052930E-01	Hanwha(1.243433); SK Holdings(0.162545)	2.40463	0	12.4046	63.4823	-261.574	65.9083	1.20232	0	6.20232	0	0	61504
1726	Samsung Electronics	1.47992	143	1	3.254962485862010E-01	Hanwha(4.624310); SK Holdings(0.418199)	13.9177	0	42.9177	76.3072	-22.4981	212.809	6.23895	0	19.239	0	0	208938
1727	SK Holdings	0.821742	143	9	2.352447080519480E-02	SK Holdings(1.000000)	-3.74341	0	17.2566	-37.6124	0	173.388	-4.45644	0	20.5436	0	0	106248
1728	S-Oil	1.00971	143	6	3.995739773035130E-03	S-Oil(1.000000)	0.087354	0	9.08735	0.029118	0	3.02912	0.106765	0	11.1068	0	0	27122
1729	GS Caltex	0.491175	144	12	-4.046765003252550E-02	GS Caltex(1.000000)	-12.2118	0	11.7882	-7.63237	0	7.36763	-25.4412	0	24.5588	0	0	38235
1730	Hanwha	0.209607	144	1	4.879455375904960E-01	Hyundai Motor(0.338123); POSCO(0.112367)	-45.0524	-3.63726	8.31032	-177.048	0	46.9519	-13.4367	0	3.56331	0	0	35574
1731	Hyundai Motor	0.700157	144	4	2.898005034571400E-01	Hyundai Motor(1.000000)	-9.29514	0	21.7049	-26.9859	0	63.0141	-3.89796	0	9.10204	0	0	84771
1732	KEPCO	1.11913	144	2	-2.998995703699770E-02	POSCO(0.044860); SK Holdings(0.484648)	0.833938	0	7.83394	9.05419	0	85.0542	28.7113	-260.653	9.05834	0	0	54252
1733	KIA Motor	0.43726	144	11	-4.925007656386310E-01	LG Electronics(0.116464); Lotte Shopping(0.210376); S-Oil(1.197288)	-18.0077	0	13.9923	-14.0685	0	10.9315	-21.9468	0	17.0532	0	0	44730
1734	KOGAS	1.29798	144	1	-7.719822062313080E-02	Lotte Shopping(0.922110); SK Holdings(0.101674)	1.7879	0	7.7879	5.95968	0	25.9597	9.2375	-25.9263	14.3112	0	0	35411
1735	LG Electronics	0.424411	144	9	2.200909667336710E-01	LG Electronics(1.000000)	-18.9944	0	14.0056	-57.5589	0	42.4411	-9.78501	0	7.21499	0	0	57038
1736	Lotte Shopping	0.182478	144	6	2.163030805895310E-01	Lotte Shopping(1.000000)	-30.2483	0	6.75168	-49.8689	0	11.1311	-60.4966	0	13.5034	0	0	26687
1737	POSCO	0.864505	144	12	-2.815239283876930E-02	POSCO(1.000000)	-1.35495	0	8.64505	-35.7707	0	228.229	-0.677476	0	4.32252	0	0	61504
1738	Samsung Electronics	1.67065	144	5	-4.961559335438730E-01	Hyundai Motor(1.945353); POSCO(0.569443); SK Holdings(0.084759)	19.4487	0	48.4487	106.633	0	265.633	8.71839	0	21.7184	0	0	208938
1739	SK Holdings	0.731617	144	12	1.570508092254670E-01	SK Holdings(1.000000)	-5.63604	0	15.364	-56.6287	0	154.371	-6.70957	0	18.2904	0	0	106248
1740	S-Oil	1.01533	144	10	3.896391906946640E-02	S-Oil(1.000000)	0.137986	0	9.13799	0.045995	0	3.046	0.16865	0	11.1686	0	0	27122
1741	GS Caltex	0.60259	145	3	-2.864316829267170E-01	KIA Motor(0.854795)	-9.53784	-2.89243	11.5697	-5.96115	0	9.03885	-19.8705	-16.0289	14.1006	0	0	38235
1742	Hanwha	0.24968	145	2	3.761296092625930E-02	LG Electronics(0.623689)	-42.7683	-5.99231	8.23943	-168.072	-30.9603	24.968	-12.7554	0	4.24456	0	0	35574
1743	Hyundai Motor	0.778043	145	9	-5.839010965732170E-02	LG Electronics(1.486220)	-6.88068	-4.48519	19.6341	-19.9762	-10.5265	59.4974	-2.88544	0	10.1146	0	0	84771
1744	KEPCO	1.15254	145	5	-4.135934803719960E-01	SK Holdings(0.510617)	1.06776	0	8.06776	11.5929	-6.53105	81.0618	36.7616	-268.157	9.60448	0	0	54252
1745	KIA Motor	0.422971	145	6	-5.600262804242530E-02	KIA Motor(1.000000)	-18.4649	0	13.5351	-14.4257	0	10.5743	-22.5041	0	16.4959	0	0	44730
1746	KOGAS	1.32082	145	2	3.214372197255950E-01	Lotte Shopping(0.926356); SK Holdings(0.100607)	1.92493	0	7.92493	6.41643	0	26.4164	9.94547	-26.3824	14.563	0	0	35411
1747	LG Electronics	0.400327	145	6	1.855647225455420E-01	LG Electronics(1.000000)	-19.7892	0	13.2108	-59.9673	0	40.0327	-10.1944	0	6.80556	0	0	57038
1748	Lotte Shopping	0.184837	145	4	-2.491417462236470E-01	Lotte Shopping(1.000000)	-30.161	0	6.83898	-49.7249	0	11.2751	-60.322	0	13.678	0	0	26687
1749	POSCO	1.46769	145	8	1.049389185065920E-01	LG Electronics(1.078299)	4.67685	-0.431672	14.2452	123.469	-344.302	43.1672	2.33842	0	7.33842	0	0	61504
1750	Samsung Electronics	1.91767	145	8	2.175739526810440E-01	LG Electronics(3.663137)	26.6124	-7.21946	48.3929	145.909	-158.264	146.645	11.9297	0	24.9297	0	0	208938
1751	SK Holdings	0.752383	145	4	2.536445250179370E-01	SK Holdings(1.000000)	-5.19996	0	15.8	-52.2472	0	158.753	-6.19043	0	18.8096	0	0	106248
1752	S-Oil	2.13724	145	7	2.784552027122040E-01	KIA Motor(0.606349)	10.2351	-11.0281	8.20699	3.41171	0	6.41171	12.5096	-13.5073	10.0023	0	0	27122
1753	GS Caltex	0.909291	146	8	4.228563134485370E-01	Lotte Shopping(0.743102); S-Oil(0.678558)	-2.177	0	21.823	-1.36063	0	13.6394	-4.53543	-15.0282	30.4364	0	0	38235
1754	Hanwha	0.146487	146	8	-7.686126619982420E-02	Samsung Electronics(0.170261)	-48.6503	-2.79451	5.55522	-191.187	-2.35505	30.4579	-14.5097	0	2.49027	0	0	35574
1755	Hyundai Motor	0.697389	146	6	2.579542782869380E-01	Hyundai Motor(1.000000)	-9.38094	0	21.6191	-27.235	0	62.765	-3.93394	0	9.06606	0	0	84771
1756	KEPCO	1.21028	146	1	-1.064786159393340E-01	Samsung Electronics(0.259656)	1.47197	0	8.47197	15.9814	-45.5316	46.4498	50.6779	-287.88	3.79778	0	0	54252
1757	KIA Motor	0.689779	146	5	7.773398198637010E-02	Lotte Shopping(1.379112); S-Oil(0.292222)	-9.92708	-5.77786	16.2951	-7.75553	0	17.2445	-12.0986	0	26.9014	0	0	44730
1758	KOGAS	1.06098	146	10	2.112427960864700E-01	KOGAS(1.000000)	0.36589	0	6.36589	1.21963	0	21.2196	1.89043	0	32.8904	0	0	35411
1759	LG Electronics	0.418977	146	5	-1.199109293012500E-01	Hyundai Motor(0.551779); Lotte Shopping(0.125644); Samsung Electronics(0.033072)	-19.1738	0	13.8262	-58.1023	0	41.8977	-9.8774	0	7.1226	0	0	57038
1760	Lotte Shopping	0.176003	146	6	-4.674945623736170E-02	Lotte Shopping(1.000000)	-30.4879	0	6.51213	-50.2638	0	10.7362	-60.9757	0	13.0243	0	0	26687
1761	POSCO	0.960444	146	11	1.869541735728960E-01	Samsung Electronics(0.294365)	-0.395557	0	9.60444	-10.4427	-200.898	52.6588	-0.197778	-0.496782	4.30544	0	0	61504
1762	Samsung Electronics	1.12509	146	6	-4.492566130091300E-01	Samsung Electronics(1.000000)	3.62769	0	32.6277	19.8897	0	178.89	1.6262	0	14.6262	0	0	208938
1763	SK Holdings	0.790079	146	11	-5.727515325165030E-01	Samsung Electronics(0.508514)	-4.40835	0	16.5917	-44.2934	-75.7386	90.968	-5.24803	-12.3143	7.43764	0	0	106248
1764	S-Oil	2.78103	146	7	-3.015435329894490E-01	S-Oil(1.000000)	16.0293	0	25.0293	5.3431	0	8.3431	19.5914	0	30.5914	0	0	27122
1765	GS Caltex	0.664291	147	1	1.875761834551150E-02	KIA Motor(0.854795)	-8.05701	-3.1886	12.7544	-5.03563	0	9.96437	-16.7854	-17.6701	15.5444	0	0	38235
1766	Hanwha	0.131053	147	6	8.818103422868080E-04	Hanwha(1.000000)	-49.53	0	7.47002	-194.644	0	29.3559	-14.7721	0	2.2279	0	0	35574
1767	Hyundai Motor	0.69852	147	1	3.487296693134690E-01	KIA Motor(0.228687); Samsung Electronics(0.356765)	-9.34589	-7.26182	14.3923	-27.1332	0	62.8668	-3.91925	0	9.08075	0	0	84771
1768	KEPCO	1.06176	147	10	2.298035962128930E-01	KEPCO(1.000000)	0.432324	0	7.43232	4.69381	0	80.6938	14.8843	0	255.884	0	0	54252
1769	KIA Motor	0.466281	147	10	4.785055741647580E-01	KIA Motor(1.000000)	-17.079	0	14.921	-13.343	0	11.657	-20.815	0	18.185	0	0	44730
1770	KOGAS	1.01295	147	6	-2.867260056791100E-02	KOGAS(1.000000)	0.077691	0	6.07769	0.258972	0	20.259	0.401406	0	31.4014	0	0	35411
1771	LG Electronics	0.409358	147	1	2.922337510337460E-01	KIA Motor(0.209619); Samsung Electronics(0.228114)	-19.4912	-3.36048	10.1483	-59.0642	0	40.9358	-10.0409	0	6.95908	0	0	57038
1772	Lotte Shopping	0.186847	147	9	-5.969104322266560E-01	KIA Motor(0.333050); KOGAS(0.240569); Samsung Electronics(0.015655)	-30.0867	0	6.91334	-49.6023	0	11.3977	-60.1733	0	13.8267	0	0	26687
1773	POSCO	0.905853	147	4	-4.022381485891250E-01	KEPCO(0.001855); Samsung Electronics(0.293883)	-0.941467	0	9.05853	-24.8547	-189.405	49.7399	-0.470734	0	4.52927	0	0	61504
1774	Samsung Electronics	1.06126	147	6	-2.278526207092550E-01	Samsung Electronics(1.000000)	1.77667	0	30.7767	9.74106	0	168.741	0.796439	0	13.7964	0	0	208938
1775	SK Holdings	0.744034	147	7	-1.327133535469550E-01	KEPCO(0.045918); Samsung Electronics(0.496592)	-5.37529	0	15.6247	-54.0088	-69.4905	87.5007	-6.39915	0	18.6009	0	0	106248
1776	S-Oil	2.35608	147	7	2.952368452683500E-01	KIA Motor(0.606349)	12.2047	-12.1573	9.04733	4.06823	0	7.06823	14.9168	-14.8904	11.0264	0	0	27122
1777	GS Caltex	0.519831	148	6	3.442850719917150E-01	KIA Motor(0.582714); S-Oil(0.448721)	-11.5241	0	12.4759	-7.20253	0	7.79747	-24.0084	-10.7714	15.2202	0	0	38235
1778	Hanwha	0.212653	148	7	-7.004056582243020E-02	Hyundai Motor(0.345296); POSCO(0.102479)	-44.8788	-3.69012	8.43109	-176.366	0	47.6342	-13.3849	0	3.6151	0	0	35574
1779	Hyundai Motor	0.695575	148	4	2.531445664325950E-01	Hyundai Motor(1.000000)	-9.43719	0	21.5628	-27.3983	0	62.6017	-3.95753	0	9.04247	0	0	84771
1780	KEPCO	1.62634	148	8	8.584918480766540E-02	Hyundai Motor(0.349243); POSCO(0.400727)	4.38441	0	11.3844	47.6021	0	123.602	150.949	-386.864	5.08489	0	0	54252
1781	KIA Motor	0.43567	148	4	-1.931840759468020E-01	KIA Motor(1.000000)	-18.0586	0	13.9414	-14.1082	0	10.8918	-22.0089	0	16.9911	0	0	44730
1782	KOGAS	1.48419	148	1	-6.191571955146590E-02	Hyundai Motor(0.405427); POSCO(0.016950)	2.90516	0	8.90516	9.68388	0	29.6839	15.01	-42.2624	3.74757	0	0	35411
1783	LG Electronics	0.438166	148	6	-6.627187378112350E-01	Hyundai Motor(0.666948); POSCO(0.008132)	-18.5405	0	14.4595	-56.1834	0	43.8166	-9.55118	-1.37886	6.06996	0	0	57038
1784	Lotte Shopping	0.205846	148	1	4.066226266074230E-01	Hyundai Motor(0.144383); KIA Motor(0.322993)	-29.3837	0	7.6163	-48.4434	0	12.5566	-58.7674	-8.439	6.7936	0	0	26687
1785	POSCO	0.961689	148	10	-4.607713680467220E-01	POSCO(1.000000)	-0.383114	0	9.61689	-10.1142	0	253.886	-0.191557	0	4.80844	0	0	61504
1786	Samsung Electronics	1.71466	148	2	-6.516843873699440E-01	Hyundai Motor(2.052893); POSCO(0.567641)	20.7251	0	49.7251	113.631	0	272.631	9.29055	-0.997863	21.2927	0	0	208938
1787	SK Holdings	1.08094	148	5	2.778490737070860E-01	Hyundai Motor(0.732638); POSCO(0.717703)	1.69979	0	22.6998	17.0788	0	228.079	2.02356	-16.9477	10.0759	0	0	106248
1788	S-Oil	1.07765	148	10	2.818146400072810E-01	S-Oil(1.000000)	0.698852	0	9.69885	0.232951	0	3.23295	0.854153	0	11.8542	0	0	27122
1789	GS Caltex	0.565386	149	2	-2.406839963119590E-01	KIA Motor(0.647713); S-Oil(0.341523)	-10.4307	0	13.5693	-6.51921	0	8.4808	-21.7307	-11.7153	16.554	0	0	38235
1790	Hanwha	0.159264	149	7	2.496010970745560E-01	POSCO(0.014385); Samsung Electronics(0.166026)	-47.9219	-3.05284	6.02523	-188.325	0	35.6752	-14.2925	0	2.70749	0	0	35574
1791	Hyundai Motor	0.778611	149	9	-6.938793993047020E-02	Hyundai Motor(1.000000)	-6.86306	0	24.1369	-19.925	0	70.075	-2.87806	0	10.1219	0	0	84771
1792	KEPCO	1.13087	149	8	2.386987134135880E-02	POSCO(0.044661); SK Holdings(0.484764)	0.916089	0	7.91609	9.94611	0	85.9461	31.5397	-263.386	9.15333	0	0	54252
1793	KIA Motor	0.426298	149	4	-9.752237909084350E-02	KIA Motor(1.000000)	-18.3585	0	13.6415	-14.3425	0	10.6575	-22.3744	0	16.6256	0	0	44730
1794	KOGAS	1.15107	149	9	1.071032211805550E-01	KOGAS(1.000000)	0.906434	0	6.90643	3.02145	0	23.0214	4.68325	0	35.6832	0	0	35411
1795	LG Electronics	0.451829	149	3	-6.597851285555590E-01	Hyundai Motor(0.458231); KIA Motor(0.125305); Samsung Electronics(0.060249)	-18.0897	0	14.9103	-54.8171	0	45.1829	-9.31892	0	7.68109	0	0	57038
1796	Lotte Shopping	0.187286	149	8	2.772082066255230E-01	KIA Motor(0.365143); KOGAS(0.212200); Samsung Electronics(0.013592)	-30.0704	0	6.9296	-49.5755	0	11.4245	-60.1408	0	13.8592	0	0	26687
1797	POSCO	0.877473	149	6	-7.995585837689450E-02	POSCO(1.000000)	-1.22527	0	8.77473	-32.3472	0	231.653	-0.612637	0	4.38736	0	0	61504
1798	Samsung Electronics	1.22519	149	9	-1.657575337874010E-01	Samsung Electronics(1.000000)	6.53048	0	35.5305	35.805	0	194.805	2.92746	0	15.9275	0	0	208938
1799	SK Holdings	0.739113	149	4	-1.872597168221400E-01	SK Holdings(1.000000)	-5.47862	0	15.5214	-55.0471	0	155.953	-6.52217	0	18.4778	0	0	106248
1800	S-Oil	1.53999	149	3	-2.837557757395180E-03	S-Oil(1.000000)	4.85987	0	13.8599	1.61996	0	4.61996	5.93984	0	16.9398	0	0	27122
1801	GS Caltex	0.514916	150	8	3.255757266936070E-01	KIA Motor(0.600228); S-Oil(0.419836)	-11.642	0	12.358	-7.27626	0	7.72374	-24.2542	-10.6695	15.0763	0	0	38235
1802	Hanwha	0.132442	150	2	3.281503144940360E-01	Samsung Electronics(0.170261)	-49.4508	-2.52659	5.02262	-194.333	-2.12927	27.5378	-14.7485	0	2.25152	0	0	35574
1803	Hyundai Motor	0.664182	150	2	2.524246243736630E-01	KIA Motor(0.242006); Samsung Electronics(0.353914)	-10.4104	-6.90485	13.6848	-30.2236	0	59.7764	-4.36564	0	8.63437	0	0	84771
1804	KEPCO	1.09425	150	2	-7.947492016980130E-01	Samsung Electronics(0.259656)	0.65973	0	7.65973	7.16278	-41.1663	41.9964	22.7135	-260.28	3.43367	0	0	54252
1805	KIA Motor	0.418958	150	12	-5.087274613665340E-03	KIA Motor(1.000000)	-18.5933	0	13.4067	-14.526	0	10.474	-22.6606	0	16.3394	0	0	44730
1806	KOGAS	1.09904	150	5	-2.829613260865160E-01	KIA Motor(0.224868); Samsung Electronics(0.121341)	0.594221	0	6.59422	1.98074	0	21.9807	3.07014	-28.7913	5.2788	0	0	35411
1807	LG Electronics	0.388111	150	7	8.892310037829520E-02	KIA Motor(0.221188); Samsung Electronics(0.225638)	-20.1923	-3.18606	9.62159	-61.1889	0	38.8111	-10.4021	0	6.59788	0	0	57038
1808	Lotte Shopping	0.179083	150	8	3.072706263949720E-01	KIA Motor(0.403053); Samsung Electronics(0.041440)	-30.3739	0	6.62607	-50.0759	0	10.9241	-60.7479	-6.11849	7.13364	0	0	26687
1809	POSCO	0.868362	150	7	2.664485611005910E-01	Samsung Electronics(0.294365)	-1.31638	0	8.68362	-34.7523	-181.637	47.6102	-0.658188	-0.449153	3.89266	0	0	61504
1810	Samsung Electronics	1.01723	150	6	1.700652360295990E-02	Samsung Electronics(1.000000)	0.499531	0	29.4995	2.73881	0	161.739	0.223928	0	13.2239	0	0	208938
1811	SK Holdings	0.71433	150	6	2.142757219906040E-01	Samsung Electronics(0.508514)	-5.99906	0	15.0009	-60.2763	-68.4772	82.2465	-7.14174	-11.1337	6.72456	0	0	106248
1812	S-Oil	1.1409	150	4	-4.892742721742800E-01	S-Oil(1.000000)	1.26812	0	10.2681	0.422705	0	3.42271	1.54992	0	12.5499	0	0	27122
1813	GS Caltex	0.539249	151	9	-4.348798648728410E-02	KIA Motor(0.595667); S-Oil(0.427358)	-11.058	0	12.942	-6.91126	0	8.08874	-23.0375	-11.1737	15.7887	0	0	38235
1814	Hanwha	0.138963	151	11	4.301261979981300E-01	Samsung Electronics(0.170261)	-49.0791	-2.65099	5.26992	-192.872	-2.2341	28.8937	-14.6376	0	2.36238	0	0	35574
1815	Hyundai Motor	0.693399	151	2	1.404927110198260E-01	LG Electronics(1.096084); Samsung Electronics(0.106503)	-9.50463	-3.5693	17.9261	-27.5941	0	62.4059	-3.98581	0	9.01419	0	0	84771
1816	KEPCO	1.13337	151	3	3.035705661868840E-01	POSCO(0.235065); Samsung Electronics(0.190461)	0.93357	0	7.93357	10.1359	0	86.1359	32.1415	-269.48	3.66186	0	0	54252
1817	KIA Motor	0.442117	151	6	2.653572812648810E-01	KIA Motor(1.000000)	-17.8523	0	14.1477	-13.9471	0	11.0529	-21.7575	0	17.2425	0	0	44730
1818	KOGAS	1.15503	151	11	2.038571439835890E-01	KIA Motor(0.223945); Samsung Electronics(0.121538)	0.930166	0	6.93017	3.10055	0	23.1006	4.80586	-30.2581	5.54773	0	0	35411
1819	LG Electronics	0.404459	151	12	2.504223774442330E-01	LG Electronics(1.000000)	-19.6529	0	13.3471	-59.5541	0	40.4459	-10.1242	0	6.8758	0	0	57038
1820	Lotte Shopping	0.18863	151	8	3.758688806884180E-01	KIA Motor(0.402302); Samsung Electronics(0.041601)	-30.0207	0	6.97929	-49.4936	0	11.5064	-60.0414	-6.44466	7.51392	0	0	26687
1821	POSCO	0.867171	151	12	-4.297058907986270E-02	POSCO(1.000000)	-1.32829	0	8.67171	-35.0668	0	228.933	-0.664144	0	4.33586	0	0	61504
1822	Samsung Electronics	1.06731	151	6	-2.528946964963090E-01	Samsung Electronics(1.000000)	1.95201	0	30.952	10.7024	0	169.702	0.875038	0	13.875	0	0	208938
1823	SK Holdings	0.741303	151	10	5.631726701236330E-01	POSCO(0.391772); Samsung Electronics(0.393191)	-5.43263	0	15.5674	-54.585	0	156.415	-6.46741	-11.3784	7.1542	0	0	106248
1824	S-Oil	1.17379	151	6	-6.295415874232950E-01	S-Oil(1.000000)	1.56407	0	10.5641	0.521357	0	3.52136	1.91164	0	12.9116	0	0	27122
1825	GS Caltex	0.502711	152	6	1.324047529489800E-01	GS Caltex(1.000000)	-11.9349	0	12.0651	-7.45933	0	7.54067	-24.8644	0	25.1356	0	0	38235
1826	Hanwha	0.131971	152	2	3.379096104184750E-01	Samsung Electronics(0.170261)	-49.4776	-2.51761	5.00476	-194.438	-2.12169	27.4399	-14.7565	0	2.24351	0	0	35574
1827	Hyundai Motor	0.671008	152	7	-6.330311286555920E-01	KIA Motor(0.219056); Samsung Electronics(0.358827)	-10.1988	-6.97581	13.8254	-29.6093	0	60.3907	-4.2769	0	8.7231	0	0	84771
1828	KEPCO	1.09036	152	8	1.102300356996460E-01	Samsung Electronics(0.259656)	0.632488	0	7.63249	6.86702	-41.0199	41.8471	21.7757	-259.354	3.42146	0	0	54252
1829	KIA Motor	0.46761	152	4	4.814974979193630E-01	KIA Motor(1.000000)	-17.0365	0	14.9635	-13.3097	0	11.6903	-20.7632	0	18.2368	0	0	44730
1830	KOGAS	1.10003	152	11	-5.252329602115110E-01	GS Caltex(0.242054); Samsung Electronics(0.125186)	0.600189	0	6.60019	2.00063	0	22.0006	3.10098	-26.3672	7.73373	0	0	35411
1831	LG Electronics	0.39406	152	8	-2.246453956013190E-01	KIA Motor(0.201212); Samsung Electronics(0.229914)	-19.996	-3.2349	9.76908	-60.594	0	39.406	-10.301	0	6.69902	0	0	57038
1832	Lotte Shopping	0.180358	152	12	-2.748304310595470E-01	GS Caltex(0.436552); Samsung Electronics(0.047839)	-30.3268	0	6.67325	-49.9982	0	11.0018	-60.6535	-1.74314	11.6034	0	0	26687
1833	POSCO	0.865274	152	6	-3.513905654517800E-02	Samsung Electronics(0.294365)	-1.34726	0	8.65274	-35.5676	-180.991	47.4409	-0.673629	-0.447556	3.87881	0	0	61504
1834	Samsung Electronics	1.01361	152	10	-2.334984725120510E-02	Samsung Electronics(1.000000)	0.394619	0	29.3946	2.1636	0	161.164	0.176898	0	13.1769	0	0	208938
1835	SK Holdings	0.71179	152	6	3.091931878789300E-01	Samsung Electronics(0.508514)	-6.05241	0	14.9476	-60.8123	-68.2337	81.954	-7.20525	-11.0941	6.70064	0	0	106248
1836	S-Oil	1.47258	152	3	1.926323293968880E-01	S-Oil(1.000000)	4.25325	0	13.2533	1.41775	0	4.41775	5.19842	0	16.1984	0	0	27122
1837	GS Caltex	0.954809	153	5	8.797712808557100E-02	Samsung Electronics(0.044012); S-Oil(1.070691)	-1.08459	0	22.9154	-0.677867	0	14.3221	-2.25956	-20.7373	27.0032	0	0	38235
1838	Hanwha	0.132403	153	2	1.186525957016200E-01	Samsung Electronics(0.170261)	-49.453	-2.52585	5.02114	-194.342	-2.12864	27.5297	-14.7491	0	2.25086	0	0	35574
1839	Hyundai Motor	0.702871	153	1	-2.917802258755580E-05	Samsung Electronics(0.384389); S-Oil(0.164351)	-9.21101	-7.13476	14.6542	-26.7416	0	63.2584	-3.86268	0	9.13732	0	0	84771
1840	KEPCO	1.09392	153	11	-1.016309856587130E-01	Samsung Electronics(0.259656)	0.65747	0	7.65747	7.13825	-41.1542	41.9841	22.6358	-260.203	3.43266	0	0	54252
1841	KIA Motor	0.75855	153	2	-4.279980423002810E-03	Samsung Electronics(0.071595); S-Oil(1.097669)	-7.72641	0	24.2736	-6.03626	0	18.9637	-9.41657	-1.54983	28.0336	0	0	44730
1842	KOGAS	1.25885	153	2	-5.950541582083170E-02	Samsung Electronics(0.149211); S-Oil(0.156152)	1.5531	0	7.5531	5.177	0	25.177	8.02435	-33.1984	5.82593	0	0	35411
1843	LG Electronics	0.419523	153	3	3.402142003390050E-01	Samsung Electronics(0.253073); S-Oil(0.153433)	-19.1557	-3.28307	10.5612	-58.0477	0	41.9523	-9.86811	0	7.13189	0	0	57038
1844	Lotte Shopping	0.256691	153	7	2.909654915924420E-01	Samsung Electronics(0.082261); S-Oil(0.350249)	-27.5024	0	9.49756	-45.3419	0	15.6581	-55.0049	-9.26455	9.73057	0	0	26687
1845	POSCO	0.868106	153	4	-7.445365202395570E-02	Samsung Electronics(0.294365)	-1.31894	0	8.68106	-34.8199	-181.584	47.5962	-0.659468	-0.449021	3.89151	0	0	61504
1846	Samsung Electronics	1.01693	153	4	-1.479491404946980E-02	Samsung Electronics(1.000000)	0.49083	0	29.4908	2.6911	0	161.691	0.220027	0	13.22	0	0	208938
1847	SK Holdings	0.71412	153	7	-8.438222989489870E-01	Samsung Electronics(0.508514)	-6.00349	0	14.9965	-60.3207	-68.457	82.2223	-7.14701	-11.1304	6.72257	0	0	106248
1848	S-Oil	2.24336	153	5	3.319519175221750E-01	S-Oil(1.000000)	11.1902	0	20.1902	3.73007	0	6.73007	13.6769	0	24.6769	0	0	27122
1849	GS Caltex	0.50006	154	10	-1.243875887788870E-01	GS Caltex(1.000000)	-11.9986	0	12.0014	-7.49911	0	7.50089	-24.997	0	25.003	0	0	38235
1850	Hanwha	0.13998	154	4	2.880739341868510E-01	Hanwha(1.000000)	-49.0212	0	7.97884	-192.645	0	31.3554	-14.6203	0	2.37965	0	0	35574
1851	Hyundai Motor	0.699408	154	6	5.938918455722540E-01	Hanwha(0.545159); LG Electronics(1.146210)	-9.31834	-2.20042	19.4812	-27.0532	0	62.9468	-3.90769	0	9.09231	0	0	84771
1852	KEPCO	1.30224	154	11	2.941189563678680E-01	POSCO(0.249624); Samsung Electronics(0.186176)	2.11567	0	9.11567	22.9701	0	98.9701	72.8394	-309.632	4.20748	0	0	54252
1853	KIA Motor	0.512931	154	3	1.403292294194800E-02	GS Caltex(0.166233); LG Electronics(0.190153); S-Oil(1.014975)	-15.5862	0	16.4138	-12.1767	0	12.8233	-18.9957	0	20.0043	0	0	44730
1854	KOGAS	1.25645	154	11	-1.896343183416340E-01	Lotte Shopping(0.614087); Samsung Electronics(0.091046)	1.5387	0	7.5387	5.12901	0	25.129	7.94996	-29.0126	9.93738	0	0	35411
1855	LG Electronics	0.400041	154	12	-2.095736710134630E-01	LG Electronics(1.000000)	-19.7987	0	13.2013	-59.9959	0	40.0041	-10.1993	0	6.80069	0	0	57038
1856	Lotte Shopping	0.186004	154	12	-3.020922722322340E-01	Lotte Shopping(1.000000)	-30.1178	0	6.88216	-49.6537	0	11.3463	-60.2357	0	13.7643	0	0	26687
1857	POSCO	0.938269	154	9	2.972153809546380E-01	POSCO(1.000000)	-0.617314	0	9.38269	-16.2971	0	247.703	-0.308657	0	4.69134	0	0	61504
1858	Samsung Electronics	1.25457	154	10	-8.776847177185670E-01	Samsung Electronics(1.000000)	7.38247	0	36.3825	40.4763	0	199.476	3.30938	0	16.3094	0	0	208938
1859	SK Holdings	0.854622	154	2	-1.679955282337870E-01	POSCO(0.417435); Samsung Electronics(0.385636)	-3.05294	0	17.9471	-30.6748	0	180.325	-3.63445	-13.1177	8.24782	0	0	106248
1860	S-Oil	1.30364	154	11	3.992507943488260E-01	S-Oil(1.000000)	2.73279	0	11.7328	0.910931	0	3.91093	3.34008	0	14.3401	0	0	27122
1861	GS Caltex	0.498633	155	10	-9.189938575569750E-02	GS Caltex(1.000000)	-12.0328	0	11.9672	-7.5205	0	7.4795	-25.0683	0	24.9317	0	0	38235
1862	Hanwha	0.143098	155	5	8.400029280862810E-01	Samsung Electronics(0.170261)	-48.8434	-2.72987	5.42671	-191.946	-2.30057	29.7534	-14.5673	0	2.43266	0	0	35574
1863	Hyundai Motor	0.699915	155	6	-9.491822361248110E-01	LG Electronics(1.103796); Samsung Electronics(0.104398)	-9.30263	-3.60284	18.0945	-27.0076	0	62.9924	-3.9011	0	9.0989	0	0	84771
1864	KEPCO	1.16793	155	5	-3.997031873076800E-01	POSCO(0.234599); Samsung Electronics(0.190598)	1.1755	0	8.1755	12.7625	0	88.7625	40.4707	-277.697	3.77353	0	0	54252
1865	KIA Motor	0.589529	155	8	-8.333170900367740E-01	GS Caltex(0.865850); LG Electronics(0.203798)	-13.1351	-5.77664	13.0883	-10.2618	0	14.7382	-16.0084	0	22.9916	0	0	44730
1866	KOGAS	1.16442	155	8	5.630669181550540E-02	GS Caltex(0.258318); Samsung Electronics(0.122210)	0.986513	0	6.98651	3.28838	0	23.2884	5.09698	-27.9106	8.18641	0	0	35411
1867	LG Electronics	0.405407	155	6	-2.449462281174030E-01	LG Electronics(1.000000)	-19.6216	0	13.3784	-59.4593	0	40.5407	-10.1081	0	6.89192	0	0	57038
1868	Lotte Shopping	0.184794	155	5	-3.906346349051640E-02	GS Caltex(0.450948); Samsung Electronics(0.045205)	-30.1626	0	6.8374	-49.7275	0	11.2725	-60.3252	-1.78602	11.8888	0	0	26687
1869	POSCO	0.895391	155	10	1.652534109356590E-01	POSCO(1.000000)	-1.04609	0	8.95391	-27.6168	0	236.383	-0.523046	0	4.47695	0	0	61504
1870	Samsung Electronics	1.09907	155	12	3.576657022401450E-01	Samsung Electronics(1.000000)	2.8729	0	31.8729	15.7514	0	174.751	1.28785	0	14.2878	0	0	208938
1871	SK Holdings	0.763827	155	3	-2.094065076727250E-01	POSCO(0.390953); Samsung Electronics(0.393432)	-4.95964	0	16.0404	-49.8325	0	161.167	-5.90433	-11.7241	7.37157	0	0	106248
1872	S-Oil	1.76853	155	7	1.558570575811560E-01	GS Caltex(0.709350)	6.91675	-7.42782	8.48893	2.30559	0	5.30558	8.45381	-1.76853	17.6853	0	0	27122
1873	GS Caltex	0.527745	156	5	-2.732435455631590E-01	Lotte Shopping(0.410226); S-Oil(1.006095)	-11.3341	0	12.6659	-7.08383	0	7.91617	-23.6128	-8.72224	17.665	0	0	38235
1874	Hanwha	0.157799	156	9	-1.024001902568600E-01	Hanwha(1.000000)	-48.0054	0	8.99455	-188.653	0	35.347	-14.3174	0	2.68258	0	0	35574
1875	Hyundai Motor	0.721371	156	11	-1.097539390240070E-01	Hanwha(0.498783); LG Electronics(1.175134)	-8.63749	-2.26951	20.093	-25.0766	0	64.9234	-3.62217	0	9.37783	0	0	84771
1876	KEPCO	1.80458	156	7	-3.344140882586320E-01	LG Electronics(0.951155)	5.63206	0	12.6321	61.1481	-98.8691	38.279	193.904	-428.397	6.50743	0	0	54252
1877	KIA Motor	0.456671	156	2	-7.640861010270950E-02	LG Electronics(0.128272); Lotte Shopping(0.216672); S-Oil(1.166260)	-17.3865	0	14.6135	-13.5832	0	11.4168	-21.1898	0	17.8102	0	0	44730
1878	KOGAS	1.37419	156	8	-1.014353608083100E-01	LG Electronics(0.620832)	2.24512	0	8.24512	7.48372	-2.49852	24.9852	11.5998	-38.3523	4.24748	0	0	35411
1879	LG Electronics	0.402447	156	12	-2.007776195276640E-01	LG Electronics(1.000000)	-19.7192	0	13.2808	-59.7553	0	40.2447	-10.1584	0	6.8416	0	0	57038
1880	Lotte Shopping	0.185041	156	10	-2.467848396795170E-01	Lotte Shopping(1.000000)	-30.1535	0	6.8465	-49.7125	0	11.2875	-60.307	0	13.693	0	0	26687
1881	POSCO	1.44002	156	2	5.505688207371040E-01	Hanwha(0.111834); LG Electronics(1.008549)	4.40019	0	14.4002	116.165	-335.623	44.5418	2.2001	0	7.2001	0	0	61504
1882	Samsung Electronics	1.7195	156	5	3.867217261833120E-03	Hanwha(1.709292); LG Electronics(2.597070)	20.8654	0	49.8654	114.4	-108.463	164.937	9.35344	0	22.3534	0	0	208938
1883	SK Holdings	1.17804	156	2	8.954165515365640E-02	LG Electronics(1.862758)	3.73884	0	24.7388	37.5665	-173.6	74.9662	4.451	-16.7067	12.7443	0	0	106248
1884	S-Oil	1.08862	156	9	3.830513351932440E-01	S-Oil(1.000000)	0.797544	0	9.79754	0.265848	0	3.26585	0.974776	0	11.9748	0	0	27122
1885	GS Caltex	0.648133	157	2	1.547453676814620E-01	KIA Motor(0.854795)	-8.44481	-3.11104	12.4442	-5.27801	0	9.72199	-17.5934	-17.2403	15.1663	0	0	38235
1886	Hanwha	0.13399	157	12	-2.391589867084550E-01	Samsung Electronics(0.170261)	-49.3626	-2.55611	5.0813	-193.986	-2.15414	27.8595	-14.7222	0	2.27782	0	0	35574
1887	Hyundai Motor	0.677856	157	7	2.506140085391390E-02	KIA Motor(0.227455); Samsung Electronics(0.357029)	-9.98645	-7.04701	13.9665	-28.9929	0	61.0071	-4.18787	0	8.81213	0	0	84771
1888	KEPCO	1.10703	157	7	-2.454108642480040E-01	Samsung Electronics(0.259656)	0.74922	0	7.74922	8.13439	-41.6473	42.4871	25.7946	-263.321	3.47379	0	0	54252
1889	KIA Motor	0.454939	157	4	-3.671721226275790E-01	KIA Motor(1.000000)	-17.442	0	14.558	-13.6265	0	11.3735	-21.2574	0	17.7426	0	0	44730
1890	KOGAS	1.13388	157	3	-1.509331740560030E-01	KIA Motor(0.213650); Samsung Electronics(0.123742)	0.803306	0	6.80331	2.67769	0	22.6777	4.15041	-29.7042	5.44618	0	0	35411
1891	LG Electronics	0.397355	157	3	-4.183696274502520E-01	KIA Motor(0.208546); Samsung Electronics(0.228344)	-19.8873	-3.26195	9.85076	-60.2645	0	39.7355	-10.245	0	6.75503	0	0	57038
1892	Lotte Shopping	0.189943	157	7	3.169180550287010E-01	KIA Motor(0.393685); Samsung Electronics(0.043446)	-29.9721	0	7.02789	-49.4135	0	11.5865	-59.9442	-6.48954	7.56624	0	0	26687
1893	POSCO	0.878508	157	4	8.024548998575250E-01	Samsung Electronics(0.294365)	-1.21492	0	8.78508	-32.074	-183.76	48.1665	-0.607461	-0.454401	3.93814	0	0	61504
1894	Samsung Electronics	1.02911	157	6	-8.390187369800390E-02	Samsung Electronics(1.000000)	0.844181	0	29.8442	4.62844	0	163.628	0.378426	0	13.3784	0	0	208938
1895	SK Holdings	0.722676	157	11	2.841003281807600E-01	Samsung Electronics(0.508514)	-5.8238	0	15.1762	-58.5153	-69.2772	83.2074	-6.9331	-11.2638	6.80312	0	0	106248
1896	S-Oil	2.29877	157	7	-1.680528094288510E-02	KIA Motor(0.606349)	11.6889	-11.8616	8.82726	3.8963	0	6.8963	14.2864	-14.5282	10.7582	0	0	27122
1897	GS Caltex	0.512914	158	6	2.073731021429420E-01	GS Caltex(1.000000)	-11.6901	0	12.3099	-7.30629	0	7.69371	-24.3543	0	25.6457	0	0	38235
1898	Hanwha	0.189748	158	11	-7.736847630802330E-02	Hanwha(1.000000)	-46.1843	0	10.8157	-181.496	0	42.5036	-13.7743	0	3.22572	0	0	35574
1899	Hyundai Motor	0.975992	158	3	-2.850730628197500E-01	Hanwha(1.971172); KIA Motor(0.327488)	-0.74425	-3.74285	26.5129	-2.16073	0	87.8393	-0.312105	0	12.6879	0	0	84771
1900	KEPCO	1.0256	158	10	-6.465227266682390E-02	KEPCO(1.000000)	0.179219	0	7.17922	1.94581	0	77.9458	6.17026	0	247.17	0	0	54252
1901	KIA Motor	0.495571	158	6	-6.924986850330500E-01	KIA Motor(1.000000)	-16.1417	0	15.8583	-12.6107	0	12.3893	-19.6727	0	19.3273	0	0	44730
1902	KOGAS	1.44245	158	2	-3.863586809715430E-01	GS Caltex(0.507038); KEPCO(0.120859); SK Holdings(0.089108)	2.65467	0	8.65467	8.8489	0	28.8489	13.7158	0	44.7158	0	0	35411
1903	LG Electronics	0.563157	158	5	-3.695091114412580E-01	Hanwha(1.240946); KIA Motor(0.288231)	-14.4158	-0.591684	17.9925	-43.6843	0	56.3157	-7.42633	0	9.57367	0	0	57038
1904	Lotte Shopping	0.21	158	11	-5.732597066173170E-01	GS Caltex(0.562647); KEPCO(0.000444); SK Holdings(0.048472)	-29.23	0	7.76999	-48.19	0	12.81	-58.46	0	15.54	0	0	26687
1905	POSCO	1.56472	158	7	-3.320813533360120E-01	Hanwha(1.119578); SK Holdings(0.204015)	5.64716	0	15.6472	149.085	-329.948	83.1365	2.82358	0	7.82358	0	0	61504
1906	Samsung Electronics	1.913	158	8	9.114341951129430E-02	Hanwha(4.266826); SK Holdings(0.537892)	26.4771	0	55.4771	145.167	-29.0819	275.085	11.869	0	24.869	0	0	208938
1907	SK Holdings	0.82585	158	9	1.013346763418470E-02	SK Holdings(1.000000)	-3.65716	0	17.3428	-36.7457	0	174.254	-4.35376	0	20.6462	0	0	106248
1908	S-Oil	1.81918	158	8	-1.877925383164560E-01	GS Caltex(0.709350)	7.3726	-7.64055	8.73206	2.45754	0	5.45754	9.01096	-1.81918	18.1918	0	0	27122
1909	GS Caltex	0.638635	159	7	1.541978299794720E-01	KIA Motor(0.854795)	-8.67275	-3.06545	12.2618	-5.42047	0	9.57953	-18.0682	-16.9877	14.9441	0	0	38235
1910	Hanwha	0.136408	159	2	3.147226279440770E-01	Samsung Electronics(0.170261)	-49.2247	-2.60225	5.17302	-193.445	-2.19302	28.3624	-14.6811	0	2.31894	0	0	35574
1911	Hyundai Motor	0.687354	159	9	1.621597149681610E-01	KIA Motor(0.234072); Samsung Electronics(0.355613)	-9.69204	-7.14574	14.1622	-28.1382	0	61.8618	-4.0644	0	8.9356	0	0	84771
1912	KEPCO	1.12701	159	8	-3.006369341261650E-01	Samsung Electronics(0.259656)	0.889093	0	7.88909	9.65301	-42.399	43.254	30.6102	-268.074	3.53649	0	0	54252
1913	KIA Motor	0.448272	159	9	3.872537393925580E-01	KIA Motor(1.000000)	-17.6553	0	14.3447	-13.7932	0	11.2068	-21.5174	0	17.4826	0	0	44730
1914	KOGAS	1.12084	159	7	-5.293618965978860E-01	Lotte Shopping(0.565454); Samsung Electronics(0.097257)	0.725068	0	6.72507	2.41689	0	22.4169	3.74619	-25.8813	8.86486	0	0	35411
1915	LG Electronics	0.402343	159	4	5.568738366737030E-01	KIA Motor(0.214304); Samsung Electronics(0.227111)	-19.7227	-3.3029	9.97442	-59.7657	0	40.2343	-10.1602	0	6.83983	0	0	57038
1916	Lotte Shopping	0.1802	159	6	-1.442319300442810E-01	Lotte Shopping(1.000000)	-30.3326	0	6.66741	-50.0078	0	10.9922	-60.6652	0	13.3348	0	0	26687
1917	POSCO	0.894365	159	11	-2.563219455479800E-01	Samsung Electronics(0.294365)	-1.05635	0	8.94365	-27.8877	-187.076	49.0359	-0.528176	-0.462602	4.00922	0	0	61504
1918	Samsung Electronics	1.04769	159	12	-1.546013284596660E-01	Samsung Electronics(1.000000)	1.38287	0	30.3829	7.58194	0	166.582	0.619907	0	13.6199	0	0	208938
1919	SK Holdings	0.73572	159	8	-5.182232542712610E-01	Samsung Electronics(0.508514)	-5.54987	0	15.4501	-55.763	-70.5277	84.7093	-6.60699	-11.4671	6.92592	0	0	106248
1920	S-Oil	2.26508	159	5	-6.326736677718950E-02	KIA Motor(0.606349)	11.3857	-11.6878	8.69791	3.79524	0	6.79524	13.9159	-14.3153	10.6006	0	0	27122
1921	GS Caltex	0.703782	160	5	2.604986571031850E-01	KIA Motor(0.854795)	-7.10922	-3.37816	13.5126	-4.44327	0	10.5567	-14.8109	-18.7206	16.4685	0	0	38235
1922	Hanwha	0.139371	160	5	-5.242323996357530E-01	Samsung Electronics(0.170261)	-49.0558	-2.65878	5.28539	-192.781	-2.24066	28.9785	-14.6307	0	2.36931	0	0	35574
1923	Hyundai Motor	0.676268	160	12	1.278014044292560E-01	Hyundai Motor(1.000000)	-10.0357	0	20.9643	-29.1359	0	60.8641	-4.20852	0	8.79148	0	0	84771
1924	KEPCO	1.15149	160	11	1.861485046381540E-01	Samsung Electronics(0.259656)	1.06046	0	8.06046	11.5136	-43.32	44.1936	36.5102	-273.897	3.61331	0	0	54252
1925	KIA Motor	0.494001	160	12	-6.821034525682480E-01	KIA Motor(1.000000)	-16.192	0	15.808	-12.65	0	12.35	-19.734	0	19.266	0	0	44730
1926	KOGAS	1.19298	160	3	-4.835391322780730E-03	KIA Motor(0.207010); Samsung Electronics(0.125164)	1.15785	0	7.15785	3.8595	0	23.8595	5.98223	-31.2522	5.73	0	0	35411
1927	LG Electronics	0.402878	160	3	4.732685254074410E-01	Hyundai Motor(0.470421); KIA Motor(0.096417); Samsung Electronics(0.061488)	-19.705	0	13.295	-59.7122	0	40.2878	-10.1511	0	6.84893	0	0	57038
1928	Lotte Shopping	0.203215	160	11	5.643345630717520E-02	KIA Motor(0.387889); Samsung Electronics(0.044687)	-29.481	0	7.51896	-48.6039	0	12.3961	-58.9621	-6.94299	8.09492	0	0	26687
1929	POSCO	0.913793	160	2	4.604706961509440E-01	Samsung Electronics(0.294365)	-0.862075	0	9.13792	-22.7588	-191.14	50.101	-0.431037	-0.472651	4.09631	0	0	61504
1930	Samsung Electronics	1.07044	160	10	-2.470056749958950E-01	Samsung Electronics(1.000000)	2.04286	0	31.0429	11.2005	0	170.2	0.915763	0	13.9158	0	0	208938
1931	SK Holdings	0.751702	160	1	6.462860152335230E-01	Samsung Electronics(0.508514)	-5.21426	0	15.7857	-52.3909	-72.0597	86.5494	-6.20745	-11.7162	7.07637	0	0	106248
1932	S-Oil	2.49614	160	8	3.758903696223100E-01	KIA Motor(0.606349)	13.4653	-12.8801	9.58518	4.48842	0	7.48842	16.4575	-15.7756	11.6819	0	0	27122
1933	GS Caltex	0.622682	161	8	2.664523296706030E-01	KOGAS(0.236032); S-Oil(1.101574)	-9.05562	0	14.9444	-5.65976	0	9.34024	-18.8659	-7.13779	23.9963	0	0	38235
1934	Hanwha	0.181943	161	11	8.829931104240620E-02	Hanwha(1.000000)	-46.6293	0	10.3707	-183.245	0	40.7552	-13.907	0	3.09303	0	0	35574
1935	Hyundai Motor	0.672952	161	10	-1.197766053200430E-01	Hyundai Motor(1.000000)	-10.1385	0	20.8615	-29.4344	0	60.5656	-4.25163	0	8.74837	0	0	84771
1936	KEPCO	1.09275	161	1	1.274999946127360E-01	POSCO(0.043986); SK Holdings(0.485154)	0.649243	0	7.64924	7.04893	0	83.0489	22.3525	-254.508	8.84478	0	0	54252
1937	KIA Motor	0.534508	161	11	8.277408230281690E-02	KOGAS(0.066931); LG Electronics(0.187080); S-Oil(1.168396)	-14.8957	0	17.1043	-11.6373	0	13.3627	-18.1542	0	20.8458	0	0	44730
1938	KOGAS	1.02594	161	12	-8.038412662579190E-02	KOGAS(1.000000)	0.155641	0	6.15564	0.518804	0	20.5188	0.804146	0	31.8041	0	0	35411
1939	LG Electronics	0.385899	161	10	4.552815322322980E-02	LG Electronics(1.000000)	-20.2653	0	12.7347	-61.4101	0	38.5899	-10.4397	0	6.56028	0	0	57038
1940	Lotte Shopping	0.202562	161	1	-2.658486066828780E-02	KOGAS(0.288914); LG Electronics(0.131684); S-Oil(0.329817)	-29.5052	0	7.49481	-48.6437	0	12.3563	-59.0104	0	14.9896	0	0	26687
1941	POSCO	0.860893	161	10	6.083175936742360E-03	POSCO(1.000000)	-1.39107	0	8.60893	-36.7242	0	227.276	-0.695535	0	4.30447	0	0	61504
1942	Samsung Electronics	1.60618	161	1	-3.486825895243100E-01	Hyundai Motor(1.520342); LG Electronics(0.769719); POSCO(0.587829)	17.5793	0	46.5793	96.3831	0	255.383	7.88038	0	20.8804	0	0	208938
1943	SK Holdings	0.713624	161	12	4.626182166881690E-02	SK Holdings(1.000000)	-6.0139	0	14.9861	-60.4254	0	150.575	-7.15941	0	17.8406	0	0	106248
1944	S-Oil	1.36083	161	3	5.660004047457040E-01	S-Oil(1.000000)	3.24743	0	12.2474	1.08248	0	4.08248	3.96909	0	14.9691	0	0	27122
1945	GS Caltex	0.497552	162	10	-8.888256747526360E-02	GS Caltex(1.000000)	-12.0587	0	11.9413	-7.53672	0	7.46328	-25.1224	0	24.8776	0	0	38235
1946	Hanwha	0.154712	162	1	1.599087159647640E-01	Samsung Electronics(0.170261)	-48.1814	-2.95142	5.86714	-189.345	-2.48729	32.1681	-14.3699	0	2.6301	0	0	35574
1947	Hyundai Motor	0.762471	162	2	-1.937760951533640E-01	KIA Motor(0.270534); Samsung Electronics(0.347807)	-7.36339	-7.92666	15.7099	-21.3776	0	68.6224	-3.08788	0	9.91212	0	0	84771
1948	KEPCO	1.03045	162	4	-9.550541013849130E-02	KEPCO(1.000000)	0.213173	0	7.21317	2.31445	0	78.3144	7.33924	0	248.339	0	0	54252
1949	KIA Motor	0.430241	162	10	-1.422164912598690E-01	KIA Motor(1.000000)	-18.2323	0	13.7677	-14.244	0	10.756	-22.2206	0	16.7794	0	0	44730
1950	KOGAS	1.23027	162	3	2.510092383911530E-01	GS Caltex(0.273519); Samsung Electronics(0.119428)	1.3816	0	7.3816	4.60534	0	24.6053	7.13828	-29.4889	8.64935	0	0	35411
1951	LG Electronics	0.442807	162	7	-4.967635574433690E-01	KIA Motor(0.245742); Samsung Electronics(0.220381)	-18.3874	-3.63507	10.9776	-55.7193	0	44.2807	-9.47228	0	7.52772	0	0	57038
1952	Lotte Shopping	0.189565	162	10	-6.107005101255870E-01	GS Caltex(0.463594); Samsung Electronics(0.042891)	-29.9861	0	7.01389	-49.4366	0	11.5634	-59.9722	-1.83212	12.1957	0	0	26687
1953	POSCO	1.00582	162	3	-4.032983601263090E-01	Samsung Electronics(0.271542); SK Holdings(0.044882)	0.058204	0	10.0582	1.53659	-207.19	58.3465	0.029102	0	5.0291	0	0	61504
1954	Samsung Electronics	1.18827	162	9	-4.034651745908550E-02	Samsung Electronics(1.000000)	5.45969	0	34.4597	29.9342	0	188.934	2.44745	0	15.4474	0	0	208938
1955	SK Holdings	0.743709	162	10	-2.185867192156100E-01	SK Holdings(1.000000)	-5.38211	0	15.6179	-54.0774	0	156.923	-6.40727	0	18.5927	0	0	106248
1956	S-Oil	1.76469	162	2	2.509334904337390E-01	GS Caltex(0.709350)	6.88225	-7.41172	8.47053	2.29408	0	5.29408	8.41163	-1.76469	17.6469	0	0	27122
1957	GS Caltex	0.526391	163	2	1.622230977799540E-01	Samsung Electronics(0.023825); S-Oil(1.226200)	-11.3666	0	12.6334	-7.10413	0	7.89587	-23.6804	-11.4326	14.887	0	0	38235
1958	Hanwha	0.134841	163	1	3.400943071527010E-02	Samsung Electronics(0.170261)	-49.314	-2.57236	5.1136	-193.796	-2.16783	28.0366	-14.7077	0	2.2923	0	0	35574
1959	Hyundai Motor	0.67615	163	9	8.172334287659130E-02	Samsung Electronics(0.363090); S-Oil(0.328432)	-10.0394	-6.86351	14.0971	-29.1465	0	60.8535	-4.21006	0	8.78994	0	0	84771
1960	KEPCO	1.11407	163	7	1.039464012831950E-01	Samsung Electronics(0.259656)	0.798471	0	7.79847	8.66911	-41.912	42.7571	27.4902	-264.994	3.49587	0	0	54252
1961	KIA Motor	0.443339	163	11	2.693313776335050E-01	Samsung Electronics(0.041088); S-Oil(1.332689)	-17.8132	0	14.1868	-13.9165	0	11.0835	-21.7098	-0.90581	16.3844	0	0	44730
1962	KOGAS	1.13111	163	8	-2.013628450069900E-01	Samsung Electronics(0.131646); S-Oil(0.291464)	0.786677	0	6.78668	2.62226	0	22.6223	4.0645	-29.8297	5.23476	0	0	35411
1963	LG Electronics	0.395091	163	2	3.405476919371840E-01	Samsung Electronics(0.234026); S-Oil(0.300169)	-19.962	-3.09187	9.94612	-60.4909	0	39.5091	-10.2835	0	6.71654	0	0	57038
1964	Lotte Shopping	0.187114	163	4	-4.109477848245520E-01	Samsung Electronics(0.058880); S-Oil(0.530370)	-30.0768	0	6.92323	-49.586	0	11.414	-60.1535	-6.75338	7.09308	0	0	26687
1965	POSCO	0.884091	163	7	-1.540391737294890E-01	Samsung Electronics(0.294365)	-1.15909	0	8.84091	-30.5999	-184.927	48.4726	-0.579544	-0.457289	3.96317	0	0	61504
1966	Samsung Electronics	1.03565	163	6	9.922949670312600E-02	Samsung Electronics(1.000000)	1.03386	0	30.0339	5.6684	0	164.668	0.463454	0	13.4635	0	0	208938
2305	GS Caltex	0.512506	192	7	1.389166569425060E-02	Lotte Shopping(0.420927); S-Oil(0.995565)	-11.6999	0	12.3001	-7.31241	0	7.68759	-24.3747	-8.47039	17.1549	0	0	38235
2306	Hanwha	0.186745	192	11	8.785179063751520E-03	Hanwha(1.000000)	-46.3556	0	10.6444	-182.169	0	41.8308	-13.8253	0	3.17466	0	0	35574
2307	Hyundai Motor	0.945927	192	8	3.556944530125410E-02	Hanwha(1.996333); S-Oil(0.507095)	-1.67625	-3.19804	26.1257	-4.86653	0	85.1335	-0.702944	0	12.2971	0	0	84771
2308	KEPCO	1.38371	192	8	-2.906694412745680E-01	KOGAS(1.532066)	2.68598	0	9.68598	29.1621	-72.8755	32.2866	92.4745	-283.43	50.0442	0	0	54252
2309	KIA Motor	0.466499	192	5	-1.385015516230410E-01	Hanwha(0.123356); Lotte Shopping(0.230445); S-Oil(1.260668)	-17.072	0	14.928	-13.3375	0	11.6625	-20.8066	0	18.1934	0	0	44730
2310	KOGAS	1.05369	192	6	-1.683636887258620E-01	KOGAS(1.000000)	0.322168	0	6.32217	1.07389	0	21.0739	1.66453	0	32.6645	0	0	35411
2311	LG Electronics	0.543263	192	5	3.624530714693110E-01	Hanwha(1.264679); S-Oil(0.444226)	-15.0723	-0.194521	17.7332	-45.6737	0	54.3263	-7.76453	0	9.23547	0	0	57038
2312	Lotte Shopping	0.175129	192	12	1.108542781823730E-02	Lotte Shopping(1.000000)	-30.5202	0	6.47978	-50.3171	0	10.6829	-61.0404	0	12.9596	0	0	26687
2313	POSCO	1.79017	192	8	1.071585471322630E-01	Hanwha(1.612096); KOGAS(0.117345)	7.90173	0	17.9017	208.606	-402.698	69.9081	3.95087	0	8.95087	0	0	61504
2314	Samsung Electronics	2.11181	192	5	2.379986433505140E-02	Hanwha(5.576179); KOGAS(0.298523)	32.2426	0	61.2426	176.778	-96.2315	239.547	14.4536	0	27.4536	0	0	208938
2315	SK Holdings	1.34701	192	2	1.784445088505650E-02	Hanwha(2.170434); KOGAS(0.819999)	7.28722	0	28.2872	73.2192	-176.148	108.072	8.67527	0	33.6753	0	0	106248
2316	S-Oil	1.06836	192	6	-2.261097464462970E-01	S-Oil(1.000000)	0.615269	0	9.61527	0.20509	0	3.20509	0.751996	0	11.752	0	0	27122
2317	GS Caltex	0.518862	193	4	-2.725646936086530E-01	GS Caltex(1.000000)	-11.5473	0	12.4527	-7.21707	0	7.78293	-24.0569	0	25.9431	0	0	38235
2318	Hanwha	0.203277	193	11	-3.907101897517640E-01	Hanwha(1.000000)	-45.4132	0	11.5868	-178.466	0	45.5341	-13.5443	0	3.45571	0	0	35574
2319	Hyundai Motor	0.799674	193	11	3.353225242092680E-02	Hanwha(0.429221); LG Electronics(1.218519)	-6.21012	-2.51586	22.274	-18.0294	0	71.9706	-2.60424	0	10.3958	0	0	84771
2320	KEPCO	1.3062	193	5	3.148829919366060E-01	KOGAS(0.971238); POSCO(0.322898)	2.14339	0	9.14339	23.2711	0	99.2711	73.7938	-281.471	33.3232	0	0	54252
2321	KIA Motor	0.615744	193	8	-1.611520974945250E-02	GS Caltex(0.192322); LG Electronics(0.212241); S-Oil(0.931744)	-12.2962	0	19.7038	-9.6064	0	15.3936	-14.986	0	24.014	0	0	44730
2322	KOGAS	1.05725	193	12	-2.112769672906230E-01	KOGAS(1.000000)	0.34348	0	6.34348	1.14493	0	21.1449	1.77465	0	32.7746	0	0	35411
2323	LG Electronics	0.430247	193	4	4.973523963694760E-01	LG Electronics(1.000000)	-18.8018	0	14.1982	-56.9753	0	43.0247	-9.6858	0	7.3142	0	0	57038
2324	Lotte Shopping	0.176616	193	4	-7.659048691410420E-02	Lotte Shopping(1.000000)	-30.4652	0	6.53478	-50.2264	0	10.7736	-60.9304	0	13.0696	0	0	26687
2325	POSCO	0.923624	193	10	-3.074926039136640E-01	POSCO(1.000000)	-0.763762	0	9.23624	-20.1633	0	243.837	-0.381881	0	4.61812	0	0	61504
2326	Samsung Electronics	1.81115	193	3	-7.032735605536730E-01	Hanwha(1.368059); LG Electronics(2.237630); POSCO(0.530709)	23.5234	0	52.5234	128.973	0	287.973	10.545	0	23.545	0	0	208938
2327	SK Holdings	1.005	193	11	-2.816230000543690E-01	KOGAS(0.486267); LG Electronics(0.825680); POSCO(0.681804)	0.105058	0	21.1051	1.05559	0	212.056	0.125069	0	25.1251	0	0	106248
2328	S-Oil	1.70474	193	3	-4.494134258104820E-01	S-Oil(1.000000)	6.34269	0	15.3427	2.11423	0	5.11423	7.75217	0	18.7522	0	0	27122
2329	GS Caltex	0.498521	194	10	9.878814046477550E-02	GS Caltex(1.000000)	-12.0355	0	11.9645	-7.52219	0	7.47781	-25.074	0	24.926	0	0	38235
2330	Hanwha	0.247165	194	1	2.343625675917480E-01	LG Electronics(0.623689)	-42.9116	-5.93196	8.15644	-168.635	-30.6485	24.7165	-12.7982	0	4.2018	0	0	35574
2331	Hyundai Motor	0.770206	194	11	1.515057407793590E-01	LG Electronics(1.486220)	-7.1236	-4.44001	19.4364	-20.6814	-10.4204	58.8981	-2.98732	0	10.0127	0	0	84771
2332	KEPCO	1.02456	194	6	7.230555907808690E-02	KEPCO(1.000000)	0.171916	0	7.17192	1.86651	0	77.8665	5.91882	0	246.919	0	0	54252
2333	KIA Motor	0.421146	194	12	-5.188630531729270E-02	KIA Motor(1.000000)	-18.5233	0	13.4767	-14.4714	0	10.5286	-22.5753	0	16.4247	0	0	44730
2334	KOGAS	1.29643	194	1	1.980998172297760E-01	KEPCO(0.127542); LG Electronics(0.259077); Lotte Shopping(0.513897)	1.77856	0	7.77855	5.92852	0	25.9285	9.1892	0	40.1892	0	0	35411
2335	LG Electronics	0.396295	194	4	-1.575010070226830E-01	LG Electronics(1.000000)	-19.9223	0	13.0777	-60.3705	0	39.6295	-10.263	0	6.73701	0	0	57038
2336	Lotte Shopping	0.182795	194	12	2.175961713160570E-01	Lotte Shopping(1.000000)	-30.2366	0	6.76341	-49.8495	0	11.1505	-60.4732	0	13.5268	0	0	26687
2337	POSCO	1.4529	194	5	3.704109083701280E-01	LG Electronics(1.078299)	4.52903	-0.427324	14.1017	119.566	-340.834	42.7324	2.26451	0	7.26451	0	0	61504
[truncated: 22,013 more rows]
